# Supplementary material
Source: PubMed Central journal article supplement (PMC2888031)
Supplement: NIHMS208860-supplement-supplemental_material.pdf [file NIHMS208860-supplement-supplemental_material.pdf]

## Supporting Information

### Discovery and Structure Activity Relationship Analysis of *Staphylococcus aureus* Sortase A Inhibitors

Nuttee Suree<sup>a,b</sup>, Sung Wook Yi<sup>a</sup>, William Thieu<sup>a</sup>, Melanie Marohn<sup>a</sup>, Robert Damoiseaux<sup>c</sup>, Albert Chan<sup>a,b</sup>, Michael E. Jung<sup>a\*</sup>, Robert T. Clubb<sup>a,b,d,\*</sup>

<sup>a</sup>Department of Chemistry & Biochemistry, <sup>b</sup>Molecular Biology Institute, <sup>c</sup>Molecular Screening Shared Resource, University of California, Los Angeles, California 90095-1570, <sup>d</sup>UCLA-Department of Energy Institute for Genomics and Proteomics, University of California, Los Angeles, California 90095-1570

\* Corresponding authors. RTC (Tel.: +1 310 206 2334; fax: +1 310 206 4779; e-mail: rclubb@mbi.ucla.edu) and MEJ (Tel.: +1 310 825 7954; fax: +1 310 206 3722; e-mail: jung@chem.ucla.edu)

## Table of Contents

|                                   |           |
|-----------------------------------|-----------|
| <b>I. Observed Melting Points</b> | Page 4~5  |
| <b>II. 1D-NMR Spectra</b>         | Page 6~80 |
| 2-42                              | 6, 7      |
| 2-43                              | 8, 9      |
| 2-44                              | 10, 11    |
| 2-45                              | 12, 13    |
| 2-46                              | 14, 15    |
| 2-47                              | 16, 17    |
| 2-48                              | 18, 19    |
| 2-22                              | 20, 21    |
| 2-23                              | 22, 23    |
| 2-24                              | 24, 25    |
| 2-25                              | 26, 27    |
| 2-26                              | 28, 29    |
| 2-27                              | 30, 31    |
| 2-28                              | 32, 33    |
| 2-29                              | 34, 35    |
| 2-30                              | 36, 37    |
| 2-31                              | 38, 39    |
| 2-32                              | 40, 41    |
| 2-33                              | 42, 43    |
| 2-34                              | 44, 45    |
| 2-35                              | 46        |
| 2-36                              | 47        |
| 2-37                              | 48, 49    |
| 2-38                              | 50, 51    |

|             |        |
|-------------|--------|
| <b>2-39</b> | 52, 53 |
| <b>2-40</b> | 54     |
| <b>2-41</b> | 55, 56 |
| <b>2-10</b> | 57, 58 |
| <b>2-11</b> | 59     |
| <b>2-12</b> | 60, 61 |
| <b>2-13</b> | 62, 63 |
| <b>2-14</b> | 64, 65 |
| <b>2-15</b> | 66, 67 |
| <b>2-16</b> | 68, 69 |
| <b>2-18</b> | 70     |
| <b>2-19</b> | 71     |
| <b>2-20</b> | 72, 73 |
| <b>2-21</b> | 74     |
| <b>2-17</b> | 75, 76 |
| <b>2-49</b> | 77, 78 |
| <b>2-50</b> | 79, 80 |

### **III. 2D-NMR Spectra**

Page 81~82

|                |    |
|----------------|----|
| NOESY for 2-10 | 81 |
| NOESY for 2-18 | 82 |

## 1. Observed Melting Points (mp)

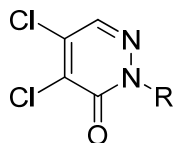

|                                            |           |
|--------------------------------------------|-----------|
| <b>2-42</b> , R = Ph                       | mp 158 °C |
| <b>2-43</b> , R = 4-nitrophenyl            | mp 221 °C |
| <b>2-44</b> , R = 3-bromophenyl            | mp 194 °C |
| <b>2-45</b> , R = 3-Fluorophenyl           | mp 192 °C |
| <b>2-46</b> , R = 3-methylphenyl (m-tolyl) | mp 117 °C |
| <b>2-47</b> , R = 3,5-dichlorophenyl       | mp 87 °C  |
| <b>2-48</b> , R = cyclohexyl               | mp 157 °C |

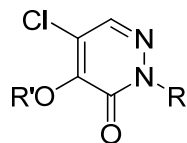

|                                                     |          |
|-----------------------------------------------------|----------|
| <b>2-22</b> , R = Ph, R' = Me                       |          |
| <b>2-23</b> , R = 3-bromophenyl, R' = Me            |          |
| <b>2-24</b> , R = 3-Fluorophenyl, R' = Me           |          |
| <b>2-25</b> , R = 3-methylphenyl (m-tolyl), R' = Me |          |
| <b>2-26</b> , R = 3,5-dichlorophenyl, R' = Me       |          |
| <b>2-27</b> , R = cyclohexyl, R' = Me               |          |
| <b>2-28</b> , R = Ph, R' = Et                       | mp 78°C  |
| <b>2-29</b> , R = 4-nitrophenyl, R' = Et            | mp 127°C |
| <b>2-30</b> , R = 3-bromophenyl, R' = Et            | mp 98°C  |
| <b>2-31</b> , R = 3-Fluorophenyl, R' = Et           | mp 101°C |
| <b>2-32</b> , R = 3-methylphenyl (m-tolyl), R' = Et | mp 84°C  |
| <b>2-33</b> , R = 3,5-dichlorophenyl, R' = Et       | mp 124°C |
| <b>2-34</b> , R = cyclohexyl, R' = Et               |          |

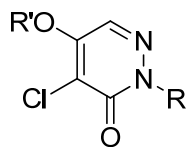

- 2-35**, R = Ph, R' = Et mp 110°C  
**2-36**, R = 4-nitrophenyl, R' = Et  
**2-37**, R = 3-bromophenyl, R' = Et mp 147°C  
**2-38**, R = 3-Fluorophenyl, R' = Et mp 138°C  
**2-39**, R = 3-methylphenyl (m-tolyl), R' = Et mp 122°C  
**2-40**, R = 3,5-dichlorophenyl, R' = Et  
**2-41**, R = cyclohexyl, R' = Et mp 141°C

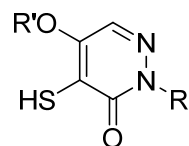

- 2-18**, R = Ph, R' = Et  
**2-19**, R = 3-Fluorophenyl, R' = Et  
**2-20**, R = 3-methylphenyl (m-tolyl), R' = Et  
**2-21**, R = 3,5-dichlorophenyl, R' = Et

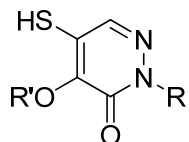

- 2-10**, R = Ph, R' = Et mp 101°C  
**2-11**, R = 4-nitrophenyl, R' = Et  
**2-12**, R = 3-bromophenyl, R' = Et  
**2-13**, R = 3-Fluorophenyl, R' = Et  
**2-14**, R = 3-methylphenyl (m-tolyl), R' = Et  
**2-15**, R = 3,5-dichlorophenyl, R' = Et  
**2-16**, R = cyclohexyl, R' = Et

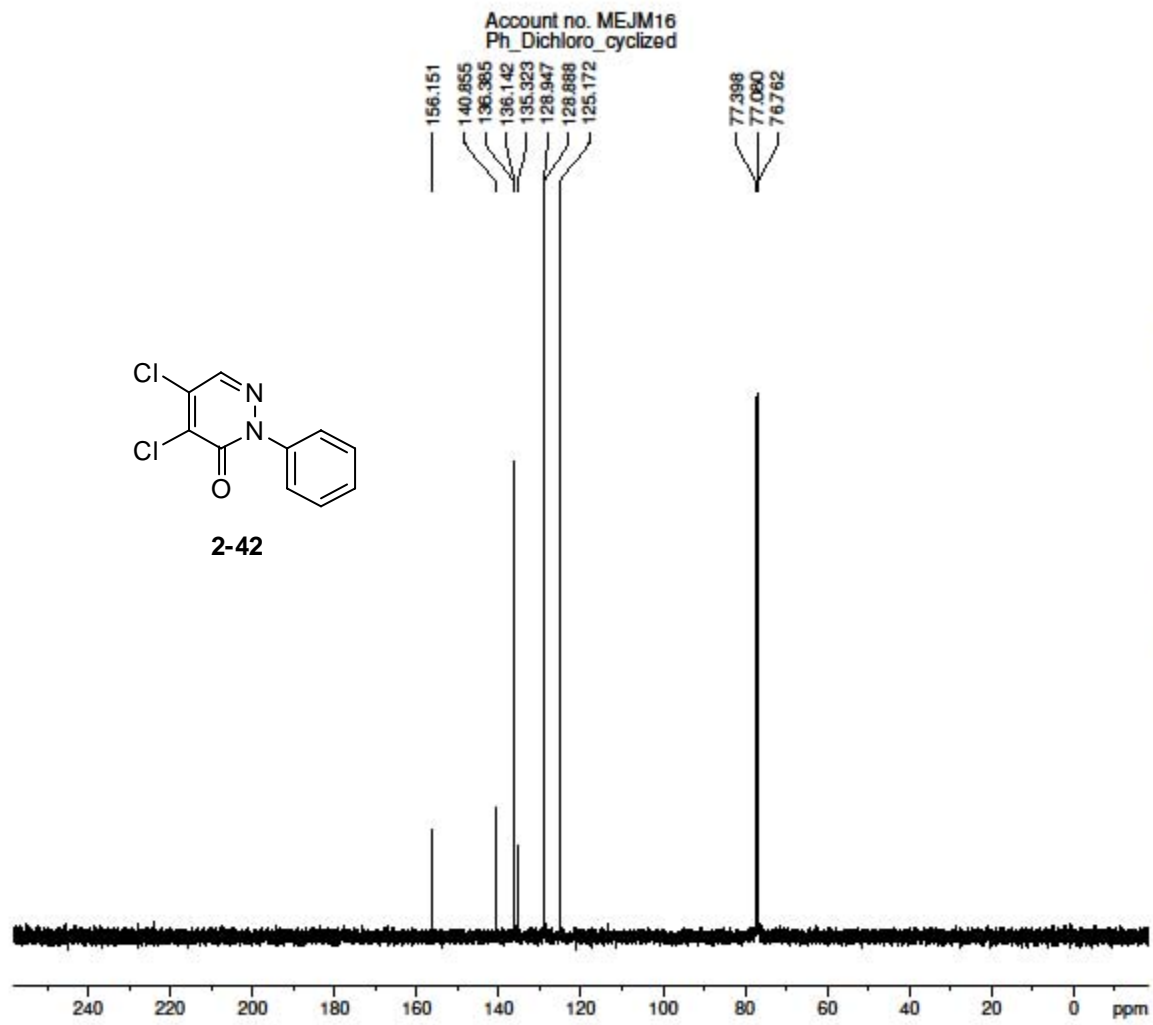

Current Data Parameters  
 NAME 100708  
 EXPNO 261  
 PROCNO 1

F2 - Acquisition Parameters  
 Date\_ 20081007  
 Time 16.56  
 INSTRUM arx400  
 PROBHD 5 mm QNP 1H  
 PULPROG zgpg30  
 TD 65536  
 SOLVENT CDCl3  
 NS 200  
 DS 0  
 SWH 27777.777 Hz  
 FIDRES 0.423855 Hz  
 AQ 1.1796980 sec  
 RG 32768  
 DW 18.000 usec  
 DE 25.71 usec  
 TE 300.0 K  
 D12 0.0000200 sec  
 DL5 23.50 dB  
 CPDPRG waltz16  
 P31 100.00 usec  
 D1 2.0000000 sec  
 P1 8.25 usec  
 SFO1 100.6248445 MHz  
 NUCLEUS 13C  
 D11 0.0300000 sec

F2 - Processing parameters  
 SI 65536  
 SF 100.6127710 MHz  
 WDW EM  
 SSB 0  
 LB 1.00 Hz  
 GB 0  
 PC 1.40

Account no. MEJM16  
Ph\_Dichloro\_cyclized

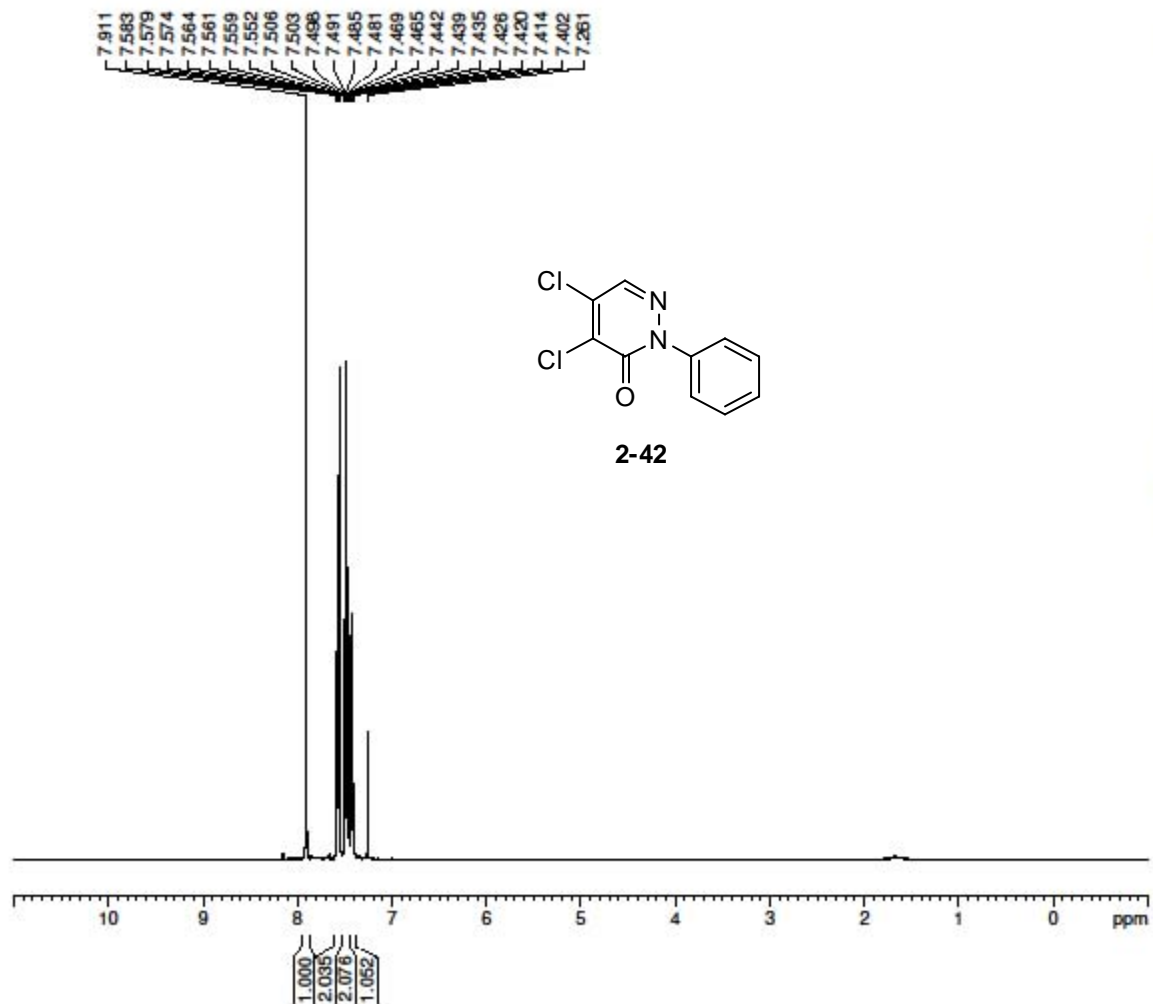

Current Data Parameters  
NAME 100708  
EXPNO 260  
PROCNO 1

F2 - Acquisition Parameters  
Date\_ 20081007  
Time 16.45  
INSTRUM ax400  
PROBHD 5 mm QNP 1H  
PULPROG zg30  
TD 65536  
SOLVENT CDCl3  
NS 8  
DS 0  
SWH 8064.516 Hz  
FIDRES 0.123055 Hz  
AQ 4.0632820 sec  
RG 715  
DW 62.000 usec  
DE 88.57 usec  
TE 300.0 K  
D1 2.0000000 sec  
P1 7.50 usec  
SFO1 400.1324008 MHz  
NUCLEUS 1H

F2 - Processing parameters  
SI 65536  
SF 400.1300173 MHz  
WDW EM  
SSB 0  
LB 0.30 Hz  
GB 0  
PC 1.00

default proton parameters

8.367  
8.361  
8.357  
8.347  
8.343  
8.338  
8.321  
7.982  
7.942  
7.912  
7.907  
7.903  
7.893  
7.889  
7.883  
7.867  
7.260

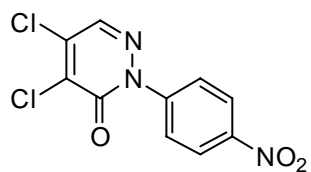

2-43

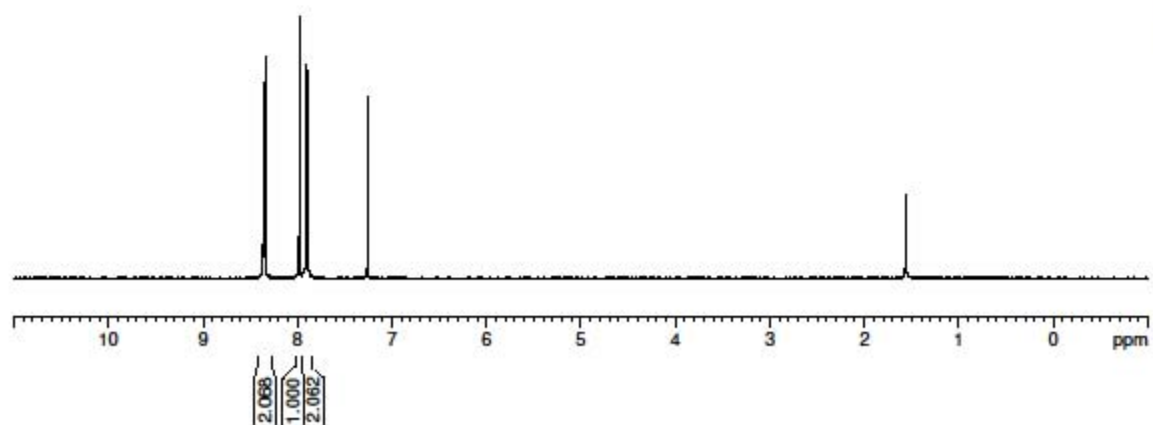

Current Data Parameters  
NAME W1-YJ43  
EXPNO 1  
PROCNO 1

F2 - Acquisition Parameters  
Date\_ 20090728  
Time 11.13  
INSTRUM avance500  
PROBHD 5 mm bb-Z 2800  
PULPROG zg30  
TD 65536  
SOLVENT CDCl3  
NS 2  
DS 0  
SWH 10000.000 Hz  
FIDRES 0.152588 Hz  
AQ 3.2769001 sec  
RG 322.5  
DW 50.000 usec  
DE 6.00 usec  
TE 296.1 K  
D1 2.00000000 sec  
MCREST 0.00000000 sec  
MCWRK 0.01500000 sec

----- CHANNEL f1 -----  
NUC1 1H  
P1 12.00 usec  
PL1 0.00 dB  
SFO1 500.3330020 MHz

F2 - Processing parameters  
SI 32768  
SF 500.3300220 MHz  
WDW EM  
SSB 0  
LB 0.30 Hz  
GB 0  
PC 1.00



default carbon parameters (proton decoupled)

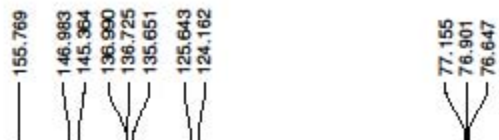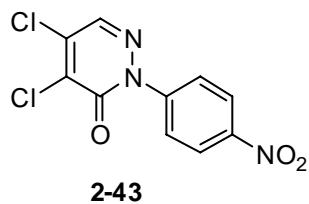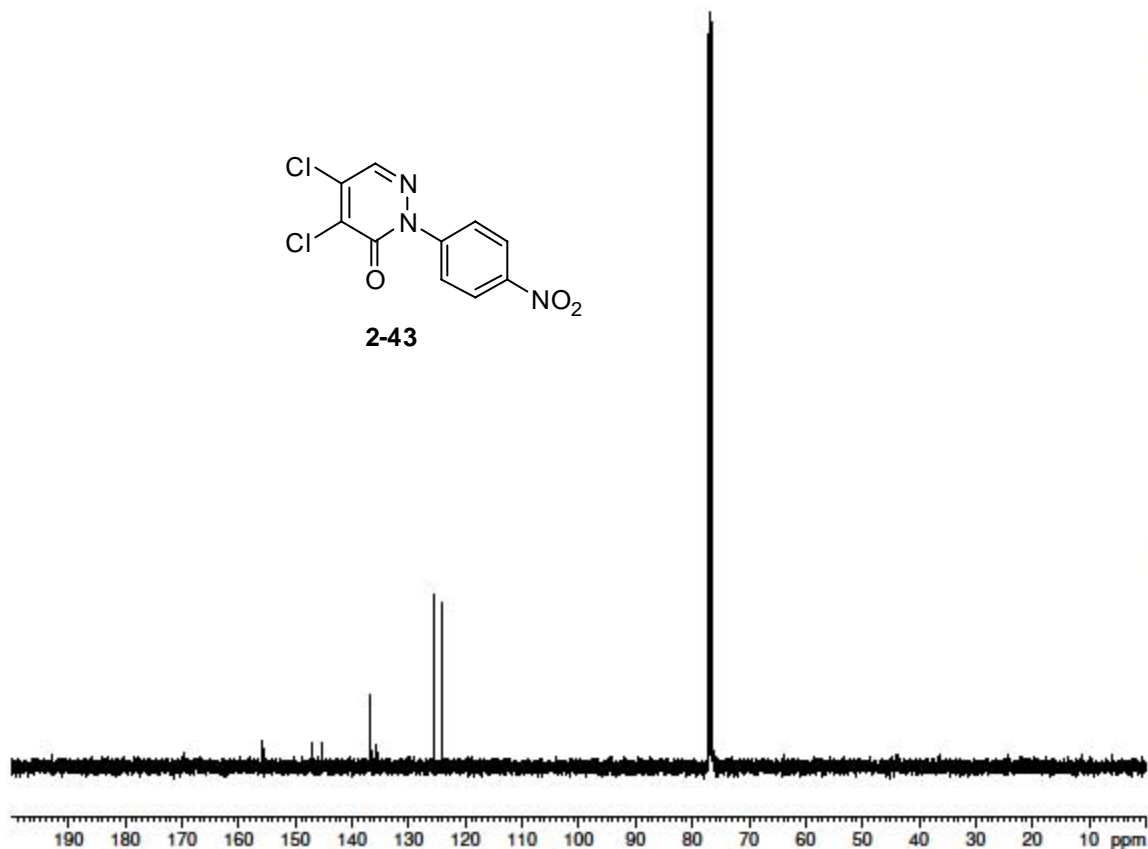

Current Data Parameters  
NAME W1-YJ43  
EXPNO 2  
PROCNO 1

F2 - Acquisition Parameters  
Date\_ 20090728  
Time 11.19  
INSTRUM avance500  
PROBHD 5 mm bb-Z 2800  
PULPROG zgpg30  
TD 65536  
SOLVENT CDCl3  
NS 203  
DS 0  
SWH 32679.738 Hz  
FIDRES 0.498653 Hz  
AQ 1.0027661 sec  
RG 2298.8  
DW 15.300 usec  
DE 6.00 usec  
TE 296.6 K  
D1 2.00000000 sec  
d11 0.03000000 sec  
MCREST 0.00000000 sec  
MCWRK 0.01500000 sec

----- CHANNEL f1 -----  
NUC1 13C  
P1 5.25 usec  
PL1 0.00 dB  
SFO1 125.8231939 MHz

----- CHANNEL f2 -----  
CPDPRG2 waltz16  
NUC2 1H  
PCPD2 100.00 usec  
PL2 120.00 dB  
PL12 16.10 dB  
SFO2 500.3320013 MHz

F2 - Processing parameters  
SI 65536  
SF 125.8080969 MHz  
WDW EM  
SSB 0  
LB 1.00 Hz  
GB 0  
PC 1.40

default carbon parameters (proton decoupled)

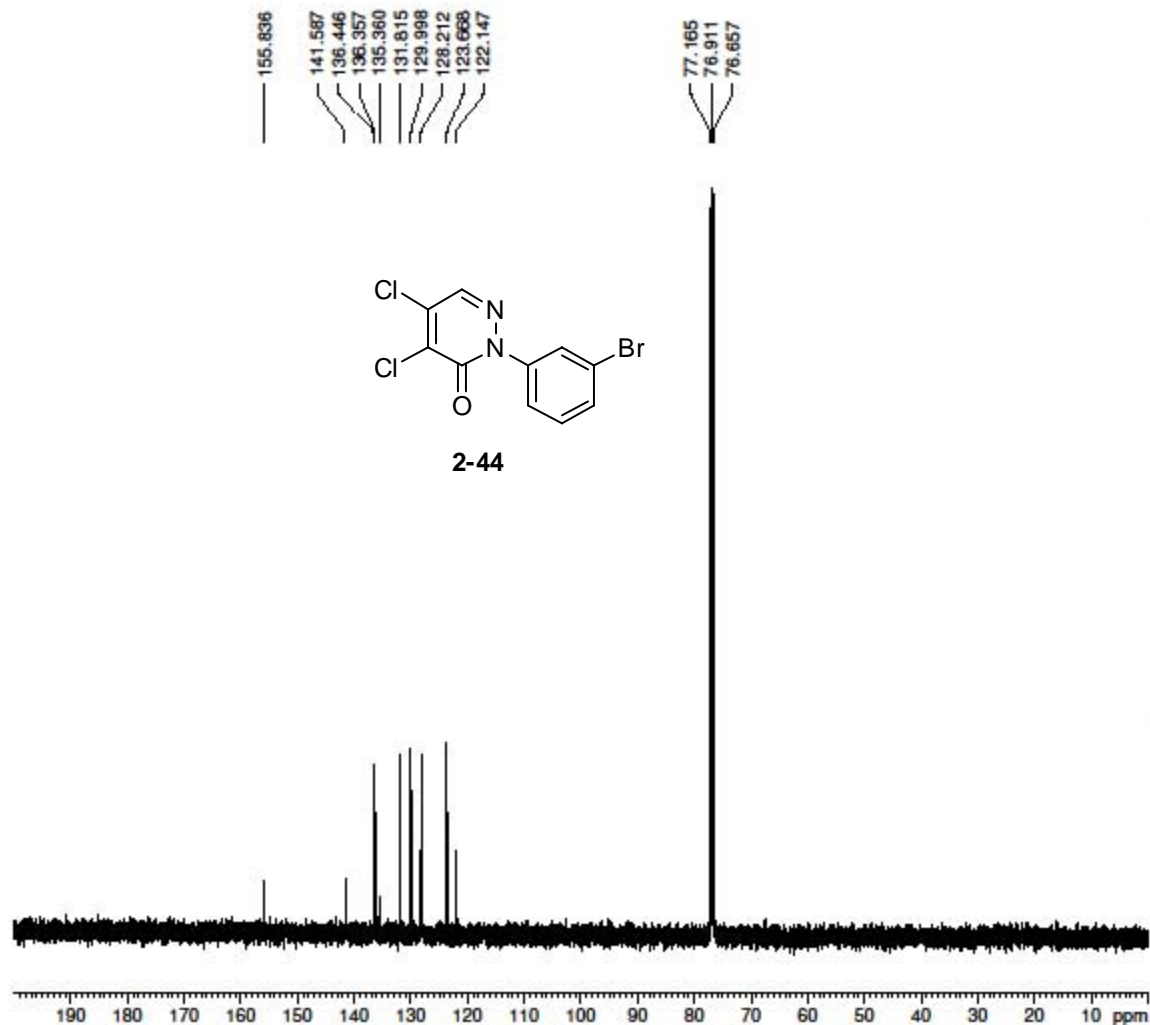

Current Data Parameters  
NAME W1-YJ2-44  
EXPNO 2  
PROCNO 1

F2 - Acquisition Parameters  
Date\_ 20090728  
Time 11.34  
INSTRUM avance500  
PROBHD 5 mm bb-Z 2800  
PULPROG zgpg30  
TD 65536  
SOLVENT CDCl3  
NS 95  
DS 0  
SWH 32679.738 Hz  
FIDRES 0.498653 Hz  
AQ 1.0027661 sec  
RG 1448.2  
DW 15.300 usec  
DE 6.00 usec  
TE 296.6 K  
D1 2.0000000 sec  
d11 0.0300000 sec  
MCREST 0.0000000 sec  
MCWRK 0.0150000 sec

----- CHANNEL f1 -----  
NUC1 13C  
P1 5.25 usec  
PL1 0.00 dB  
SFO1 125.8231939 MHz

----- CHANNEL f2 -----  
CPDPRG2 waltz16  
NUC2 1H  
PCPD2 100.00 usec  
PL2 120.00 dB  
PL12 16.10 dB  
SFO2 500.3320013 MHz

F2 - Processing parameters  
SI 65536  
SF 125.8080969 MHz  
WDW EM  
SSB 0  
LB 1.00 Hz  
GB 0  
PC 1.40

default proton parameters

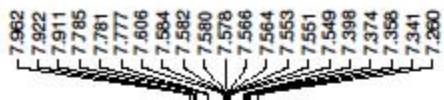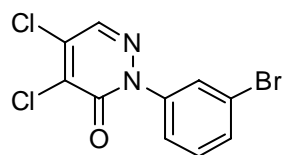

2-44

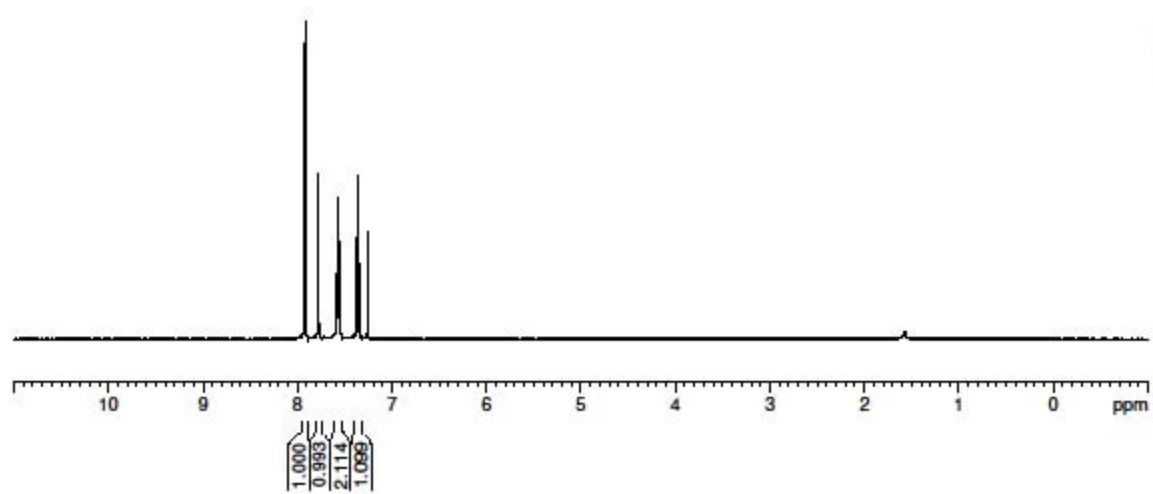

Current Data Parameters  
NAME W1-YJ2-44  
EXPNO 1  
PROCNO 1

F2 - Acquisition Parameters  
Date\_ 20090728  
Time 11.31  
INSTRUM avance500  
PROBHD 5 mm bb-Z 2800  
PULPROG zg30  
TD 65536  
SOLVENT CDCl3  
NS 2  
DS 0  
SWH 10000.000 Hz  
FIDRES 0.152588 Hz  
AQ 3.2769001 sec  
RG 256  
DW 50.000 usec  
DE 6.00 usec  
TE 296.2 K  
D1 2.00000000 sec  
MCREST 0.00000000 sec  
MCWRK 0.01500000 sec

----- CHANNEL f1 -----  
NUC1 1H  
P1 12.00 usec  
PL1 0.00 dB  
SFO1 500.3330020 MHz

F2 - Processing parameters  
SI 32768  
SF 500.3300220 MHz  
WDW EM  
SSB 0  
LB 0.30 Hz  
GB 0  
PC 1.00

default carbon parameters (proton decoupled)

163.280  
161.313  
155.835  
141.816  
141.749  
136.397  
136.303  
135.388  
129.994  
129.924  
120.688  
120.662  
115.858  
115.690  
112.909  
112.707  
77.167  
76.913  
76.659

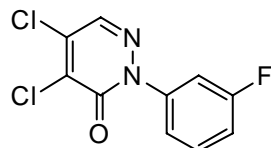

2-45

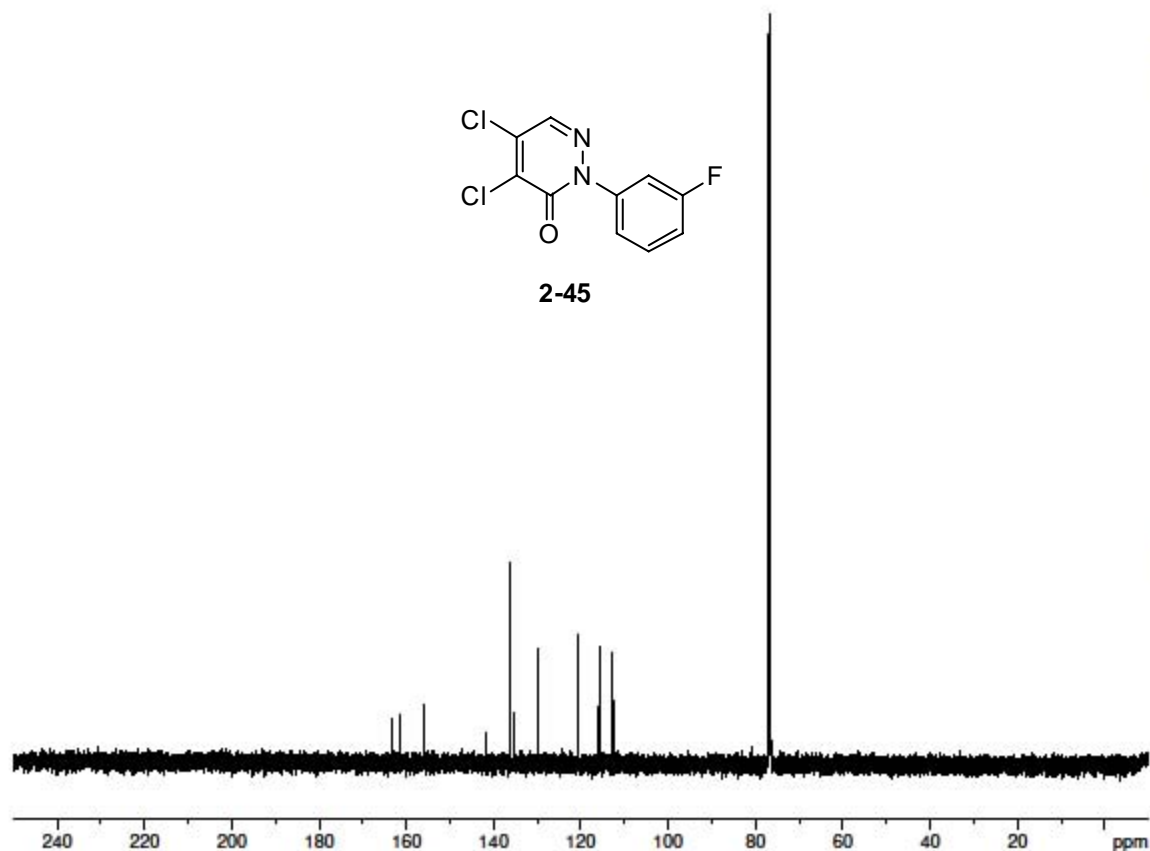

Current Data Parameters  
NAME W1-YJ2-45  
EXPNO 2  
PROCNO 1

F2 - Acquisition Parameters  
Date\_ 20090728  
Time 11.42  
INSTRUM avance500  
PROBHD 5 mm bb-Z 2800  
PULPROG zgdc30  
TD 65536  
SOLVENT CDCl3  
NS 128  
DS 0  
SWH 32679.738 Hz  
FIDRES 0.498653 Hz  
AQ 1.0027661 sec  
RG 3251  
DW 15.300 usec  
DE 6.00 usec  
TE 296.6 K  
D1 2.00000000 sec  
d11 0.03000000 sec  
MCREST 0.00000000 sec  
MCWRK 0.01500000 sec

----- CHANNEL f1 -----  
NUC1 13C  
P1 5.25 usec  
PL1 0.00 dB  
SFO1 125.8231939 MHz

----- CHANNEL f2 -----  
CPDPRG2 waltz16  
NUC2 1H  
PCPD2 100.00 usec  
PL2 120.00 dB  
PL12 16.10 dB  
SFO2 500.3320013 MHz

F2 - Processing parameters  
SI 65536  
SF 125.8080969 MHz  
WDW EM  
SSB 0  
LB 1.00 Hz  
GB 0  
PC 1.40

default proton parameters

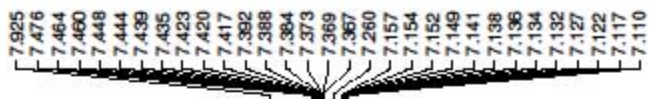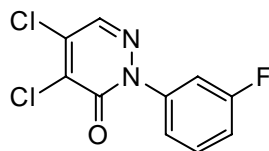

2-45

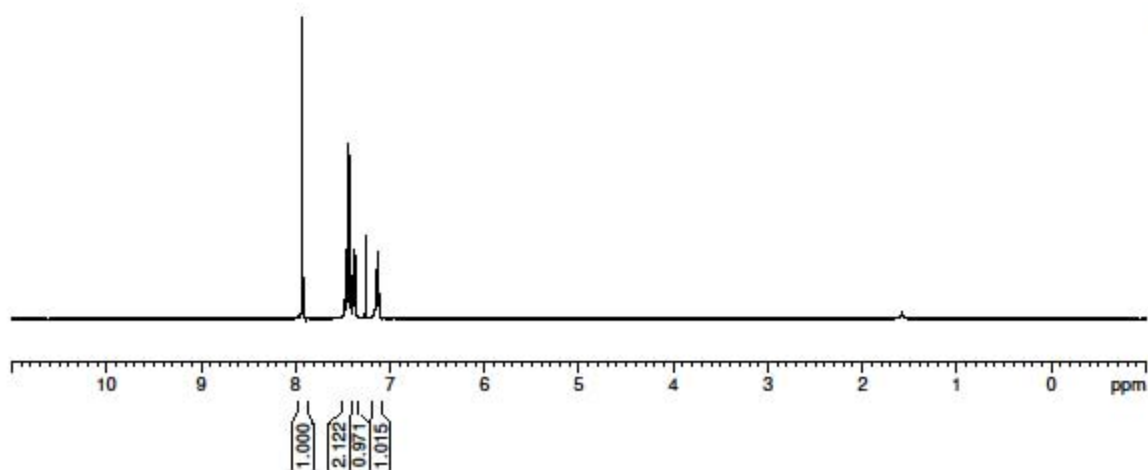

Current Data Parameters  
NAME W1-YJ2-45  
EXPNO 1  
PROCNO 1

F2 - Acquisition Parameters  
Date\_ 20090728  
Time 11.40  
INSTRUM avance500  
PROBHD 5 mm bb-Z 2800  
PULPROG zg30  
TD 65536  
SOLVENT CDCl3  
NS 2  
DS 0  
SWH 10000.000 Hz  
FIDRES 0.152588 Hz  
AQ 3.2769001 sec  
RG 256  
DW 50.000 usec  
DE 6.00 usec  
TE 296.2 K  
D1 2.00000000 sec  
MCREST 0.00000000 sec  
MCWRK 0.01500000 sec

----- CHANNEL f1 -----  
NUC1 1H  
P1 12.00 usec  
PL1 0.00 dB  
SFO1 500.3330020 MHz

F2 - Processing parameters  
SI 32768  
SF 500.3300220 MHz  
WDW EM  
SSB 0  
LB 0.30 Hz  
GB 0  
PC 1.00

default carbon parameters (proton decoupled)

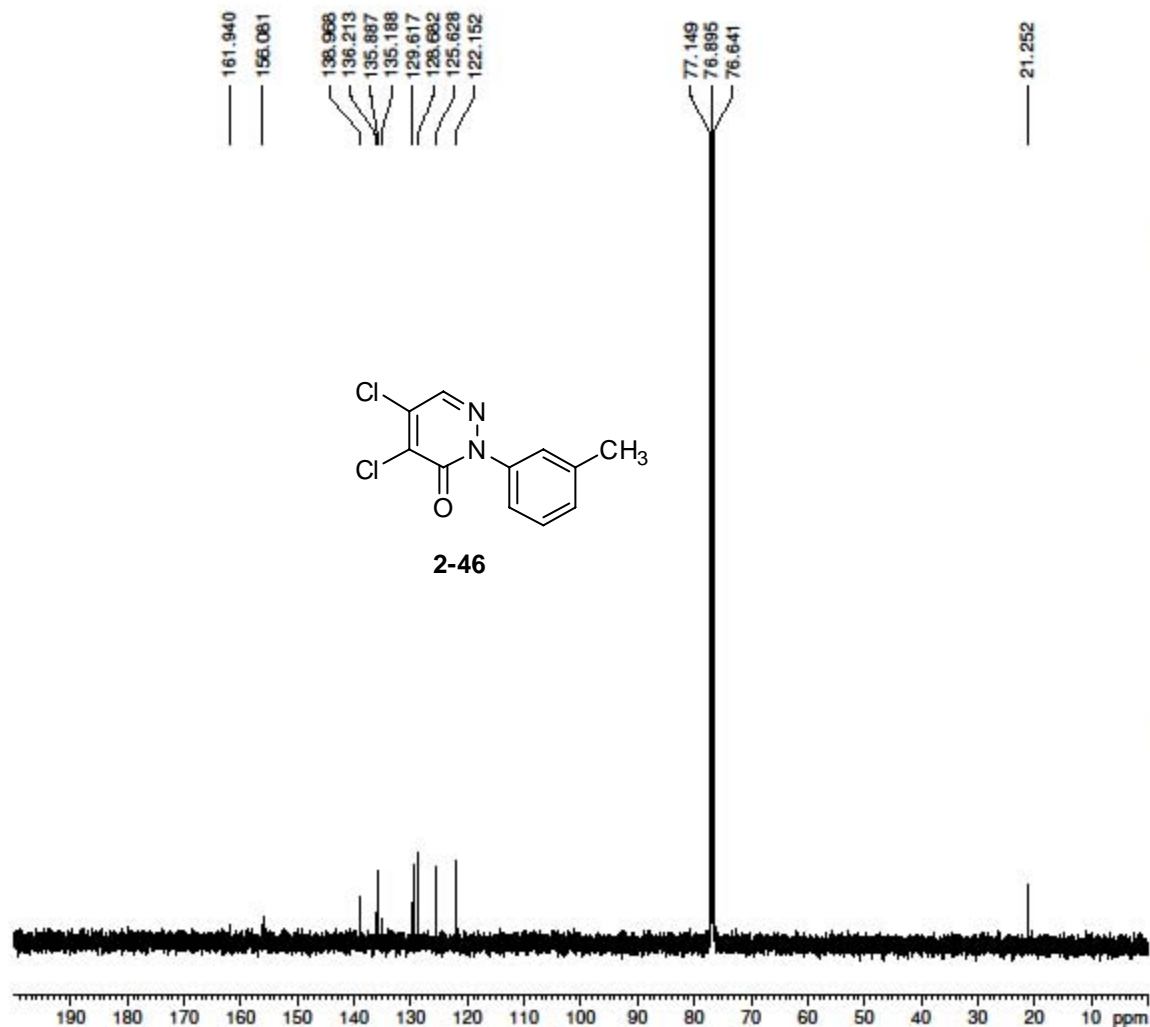

Current Data Parameters  
NAME W1-YJ2-46  
EXPNO 2  
PROCNO 1

F2 - Acquisition Parameters  
Date\_ 20090728  
Time 11.52  
INSTRUM avance500  
PROBHD 5 mm bb-Z 2800  
PULPROG zgdc30  
TD 65536  
SOLVENT CDCl3  
NS 256  
DS 0  
SWH 32679.738 Hz  
FIDRES 0.498653 Hz  
AQ 1.0027661 sec  
RG 7298.2  
DW 15.300 usec  
DE 6.00 usec  
TE 296.6 K  
D1 2.00000000 sec  
d11 0.03000000 sec  
MCREST 0.00000000 sec  
MCWRK 0.01500000 sec

----- CHANNEL f1 -----  
NUC1 13C  
P1 5.25 usec  
PL1 0.00 dB  
SFO1 125.8231939 MHz

----- CHANNEL f2 -----  
CPDPRG2 waltz16  
NUC2 1H  
PCPD2 100.00 usec  
PL2 120.00 dB  
PL12 16.10 dB  
SFO2 500.3320013 MHz

F2 - Processing parameters  
SI 65536  
SF 125.8080969 MHz  
WDW EM  
SSB 0  
LB 1.00 Hz  
GB 0  
PC 1.40

default proton parameters

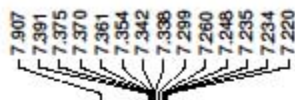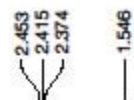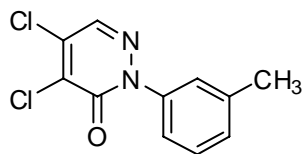

2-46

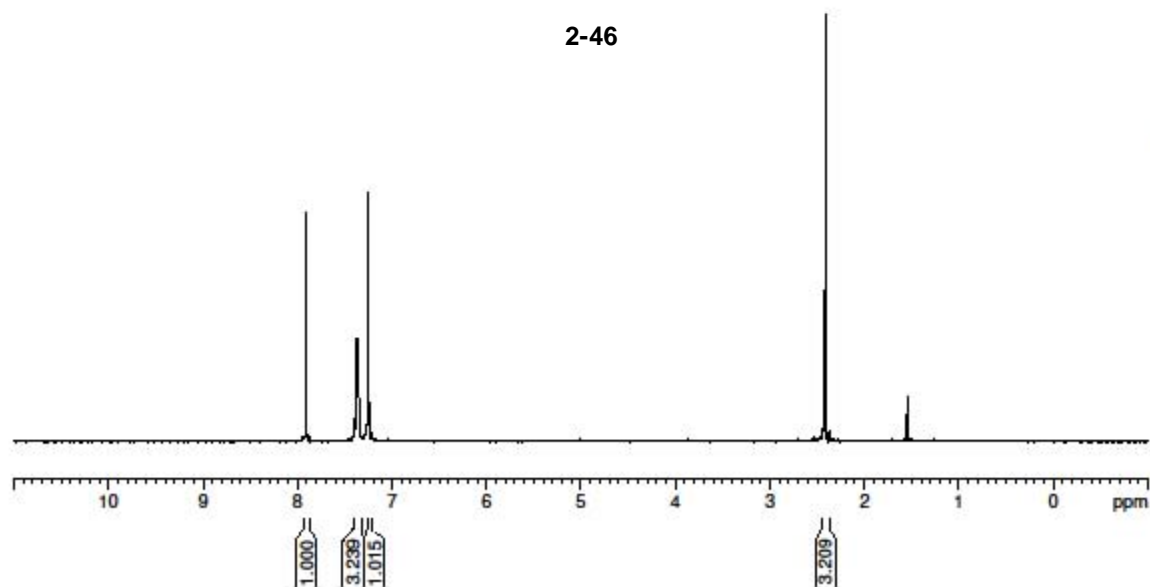

Current Data Parameters  
NAME W1-YJ2-46  
EXPNO 1  
PROCNO 1

F2 - Acquisition Parameters  
Date\_ 20090728  
Time 11.50  
INSTRUM avance500  
PROBHD 5 mm bb-Z 2800  
PULPROG zg30  
TD 65536  
SOLVENT CDCl3  
NS 2  
DS 0  
SWH 10000.000 Hz  
FIDRES 0.152588 Hz  
AQ 3.2769001 sec  
RG 181  
DW 50.000 usec  
DE 6.00 usec  
TE 296.3 K  
D1 2.00000000 sec  
MCREST 0.00000000 sec  
MCWRK 0.01500000 sec

CHANNEL f1  
NUC1 1H  
P1 12.00 usec  
PL1 0.00 dB  
SFO1 500.3330020 MHz

F2 - Processing parameters  
SI 32768  
SF 500.3300220 MHz  
WDW EM  
SSB 0  
LB 0.30 Hz  
GB 0  
PC 1.00

default carbon parameters (proton decoupled)

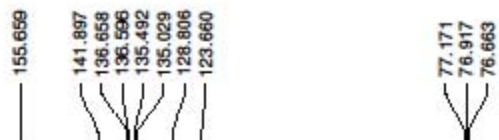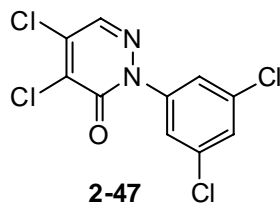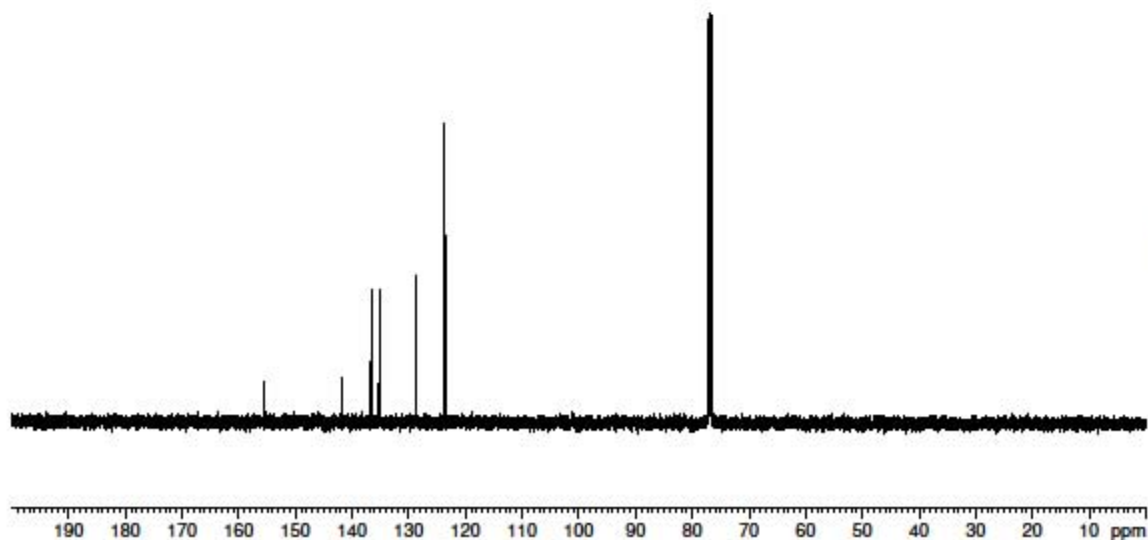

Current Data Parameters  
 NAME W1-YJ2-47  
 EXPNO 2  
 PROCNO 1

F2 - Acquisition Parameters  
 Date\_ 20090728  
 Time 12.08  
 INSTRUM avance500  
 PROBHD 5 mm bb-Z 2800  
 PULPROG zgpg30  
 TD 65536  
 SOLVENT CDCl3  
 NS 64  
 DS 0  
 SWH 32679.738 Hz  
 FIDRES 0.498653 Hz  
 AQ 1.0027661 sec  
 RG 4096  
 DW 15.300 usec  
 DE 6.00 usec  
 TE 296.7 K  
 D1 2.00000000 sec  
 d11 0.03000000 sec  
 MCREST 0.00000000 sec  
 MCWRK 0.01500000 sec

----- CHANNEL f1 -----  
 NUC1 13C  
 P1 5.25 usec  
 PL1 0.00 dB  
 SFO1 125.8231939 MHz

----- CHANNEL f2 -----  
 CPDPRG2 waitz16  
 NUC2 1H  
 PCPD2 100.00 usec  
 PL2 120.00 dB  
 PL12 16.10 dB  
 SFO2 500.3320013 MHz

F2 - Processing parameters  
 SI 65536  
 SF 125.8080969 MHz  
 WDW EM  
 SSB 0  
 LB 1.00 Hz  
 GB 0  
 PC 1.40



default proton parameters

7.926  
7.629  
7.593  
7.589  
7.416  
7.413  
7.409  
7.259

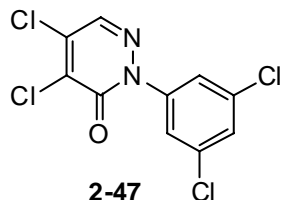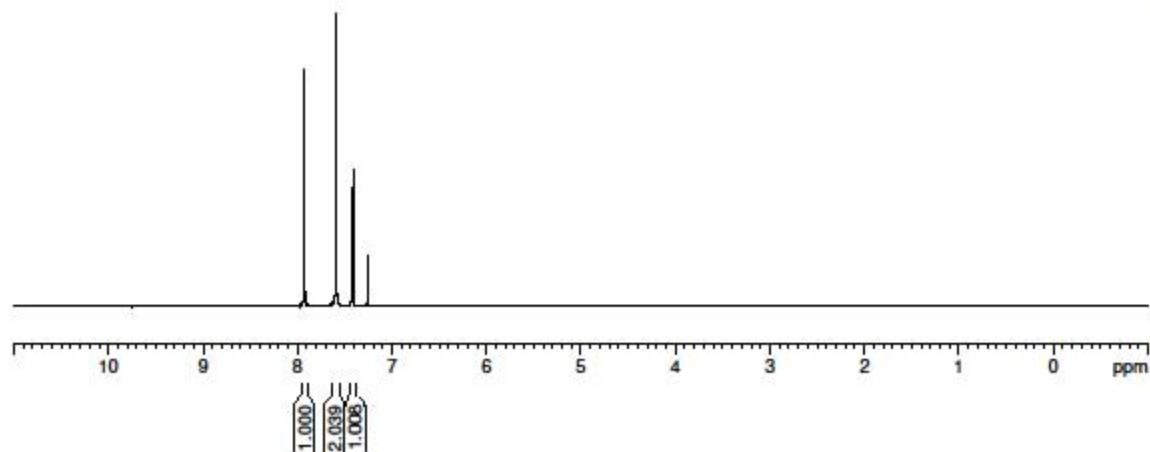

Current Data Parameters  
NAME W1-YJ2-47  
EXPNO 1  
PROCNO 1

F2 - Acquisition Parameters  
Date\_ 20090728  
Time 12.06  
INSTRUM avance500  
PROBHD 5 mm bb-Z 2800  
PULPROG zg30  
TD 65536  
SOLVENT CDCl3  
NS 2  
DS 0  
SWH 10000.000 Hz  
FIDRES 0.152588 Hz  
AQ 3.2769001 sec  
RG 1024  
DW 50.000 usec  
DE 6.00 usec  
TE 296.4 K  
D1 2.00000000 sec  
MCREST 0.00000000 sec  
MCWRK 0.01500000 sec

----- CHANNEL f1 -----  
NUC1 1H  
P1 12.00 usec  
PL1 0.00 dB  
SFO1 500.3330020 MHz

F2 - Processing parameters  
SI 32768  
SF 500.3300220 MHz  
WDW EM  
SSB 0  
LB 0.30 Hz  
GB 0  
PC 1.00

default carbon parameters (proton decoupled)

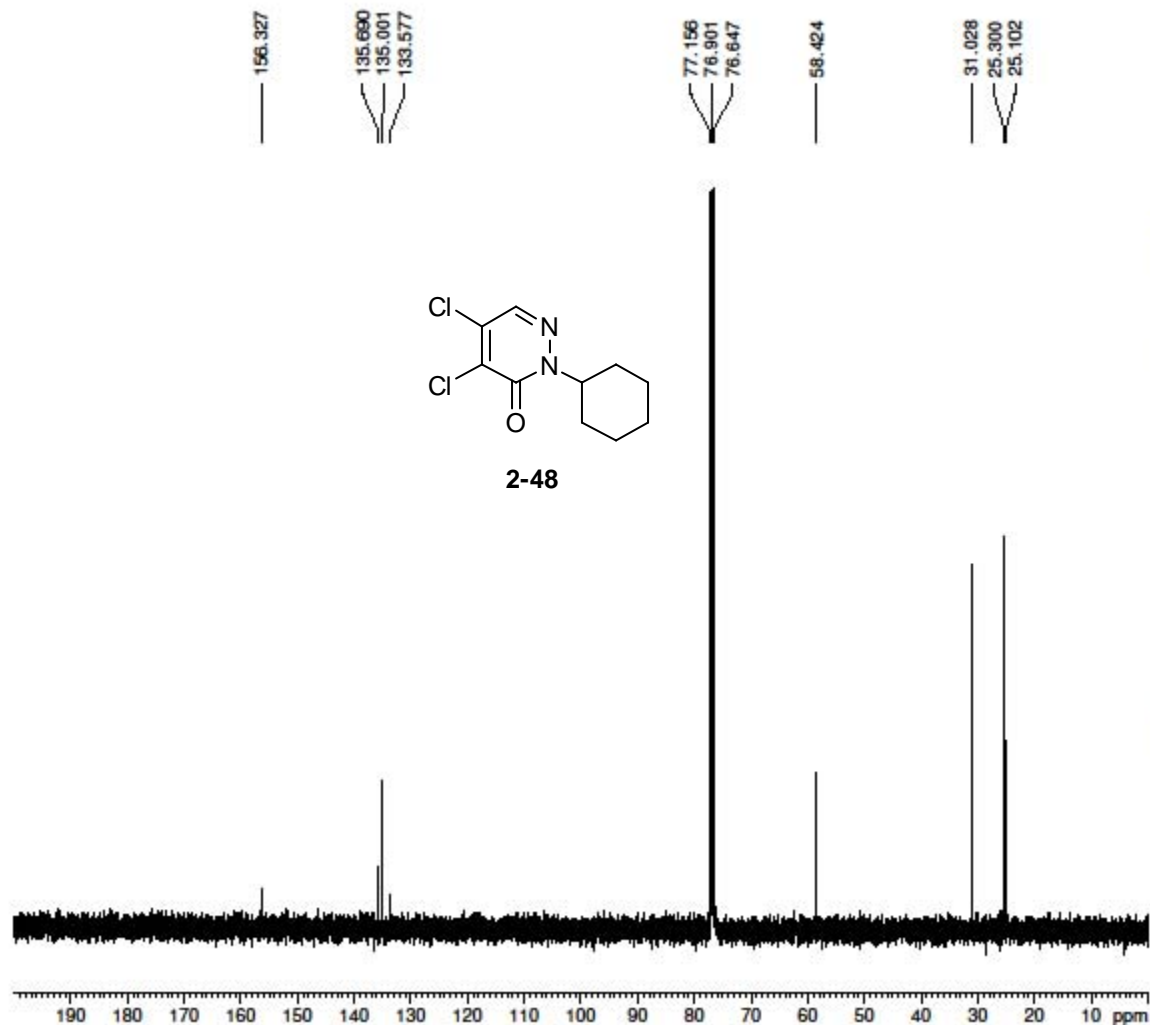

Current Data Parameters  
NAME W1-YJ2-48  
EXPNO 2  
PROCNO 1

F2 - Acquisition Parameters  
Date\_ 20090728  
Time 12.14  
INSTRUM avance500  
PROBHD 5 mm bb-Z 2800  
PULPROG zgpg30  
TD 65536  
SOLVENT CDCl3  
NS 64  
DS 0  
SWH 32679.738 Hz  
FIDRES 0.498653 Hz  
AQ 1.0027661 sec  
RG 4096  
DW 15.300 usec  
DE 6.00 usec  
TE 296.5 K  
D1 2.00000000 sec  
d11 0.03000000 sec  
MCREST 0.00000000 sec  
MCWRK 0.01500000 sec

----- CHANNEL f1 -----  
NUC1 13C  
P1 5.25 usec  
PL1 0.00 dB  
SFO1 125.8231939 MHz

----- CHANNEL f2 -----  
CPDPRG2 waltz16  
NUC2 1H  
PCPD2 100.00 usec  
PL2 120.00 dB  
PL12 16.10 dB  
SFO2 500.3320013 MHz

F2 - Processing parameters  
SI 65536  
SF 125.8080969 MHz  
WDW EM  
SSB 0  
LB 1.00 Hz  
GB 0  
PC 1.40

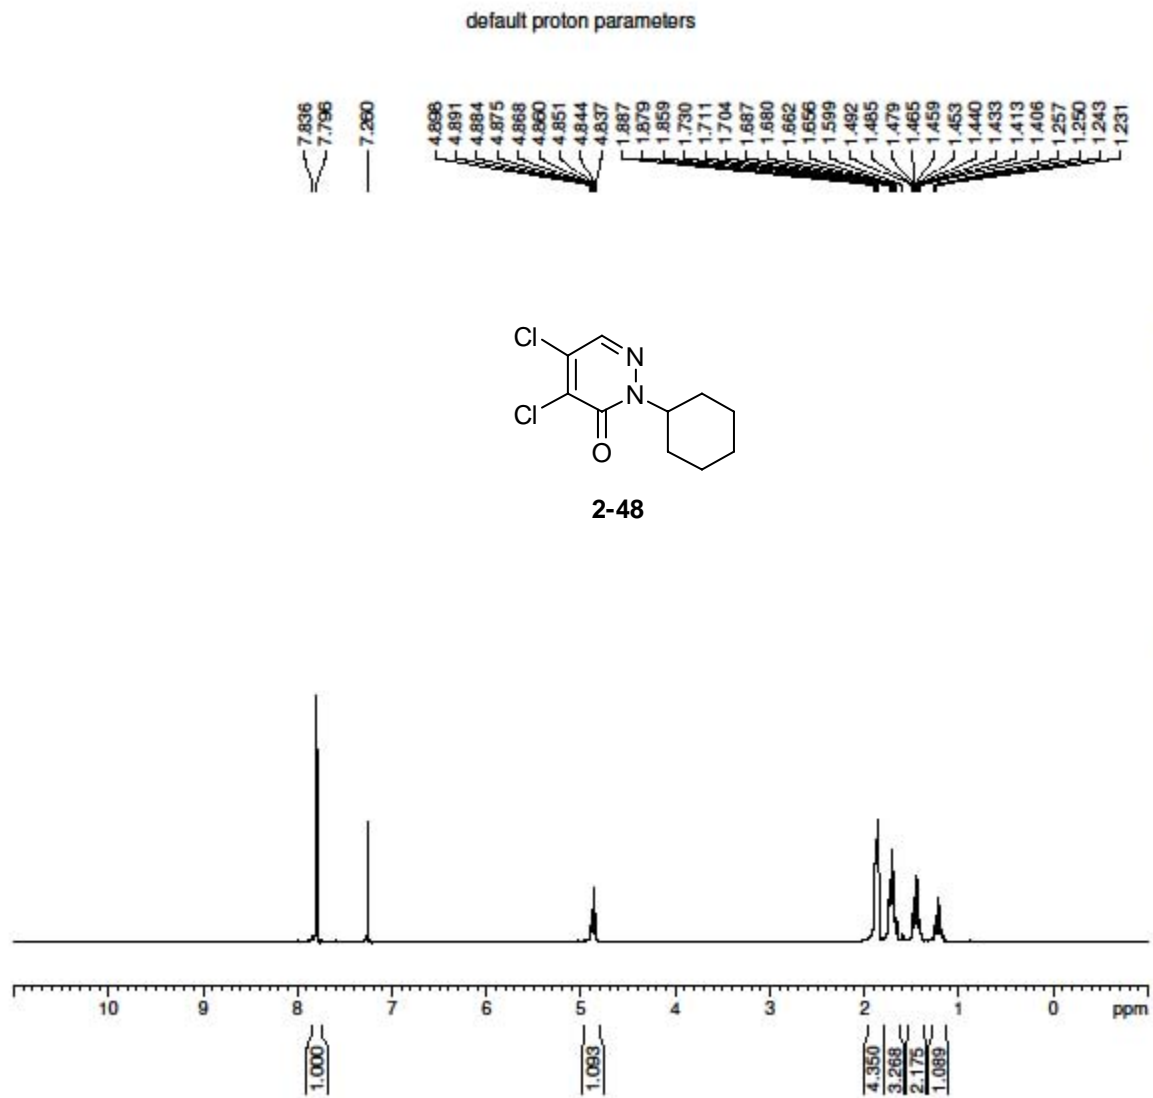

Current Data Parameters  
 NAME W1-YJ2-48  
 EXPNO 1  
 PROCNO 1

F2 - Acquisition Parameters  
 Date\_ 20090728  
 Time 12.13  
 INSTRUM avance500  
 PROBHD 5 mm bb-Z 2800  
 PULPROG zg30  
 TD 65536  
 SOLVENT CDCl3  
 NS 2  
 DS 0  
 SWH 10000.000 Hz  
 FIDRES 0.152588 Hz  
 AQ 3.2769001 sec  
 RG 128  
 DW 50.000 usec  
 DE 6.00 usec  
 TE 296.3 K  
 D1 2.00000000 sec  
 MCREST 0.00000000 sec  
 MCWRK 0.01500000 sec

----- CHANNEL f1 -----  
 NUC1 1H  
 P1 12.00 usec  
 PL1 0.00 dB  
 SFO1 500.3330020 MHz

F2 - Processing parameters  
 SI 32768  
 SF 500.3300220 MHz  
 WDW EM  
 SSB 0  
 LB 0.30 Hz  
 GB 0  
 PC 1.00

default carbon parameters (proton decoupled)

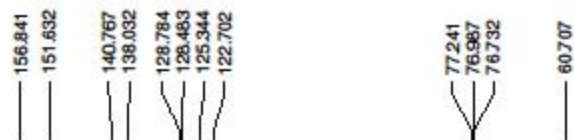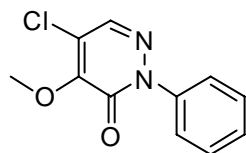

2-22

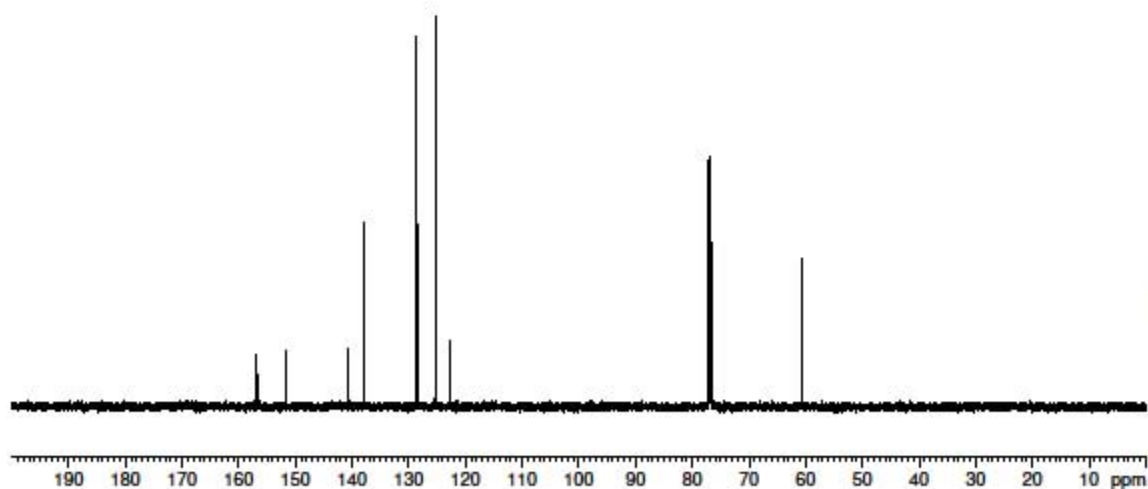

Current Data Parameters  
NAME Ph\_OMe\_A\_re  
EXPNO 2  
PROCNO 1

F2 - Acquisition Parameters  
Date\_ 20081030  
Time 11.14  
INSTRUM avance500  
PROBHD 5 mm bb-Z 2800  
PULPROG zgpg30  
TD 65536  
SOLVENT CDCl3  
NS 36  
DS 0  
SWH 32679.738 Hz  
FIDRES 0.498653 Hz  
AQ 1.0027661 sec  
RG 4096  
DW 15.300 usec  
DE 6.00 usec  
TE 295.4 K  
D1 2.00000000 sec  
d11 0.03000000 sec  
MCREST 0.00000000 sec  
MCWRK 0.01500000 sec

----- CHANNEL f1 -----  
NUC1 13C  
P1 5.25 usec  
PL1 0.00 dB  
SFO1 125.8231939 MHz

----- CHANNEL f2 -----  
CPDPRG2 waltz16  
NUC2 1H  
PCPD2 105.00 usec  
PL2 120.00 dB  
PL12 19.00 dB  
SFO2 500.3320013 MHz

F2 - Processing parameters  
SI 65536  
SF 125.8080969 MHz  
WDW EM  
SSB 0  
LB 1.00 Hz  
GB 0  
PC 1.40

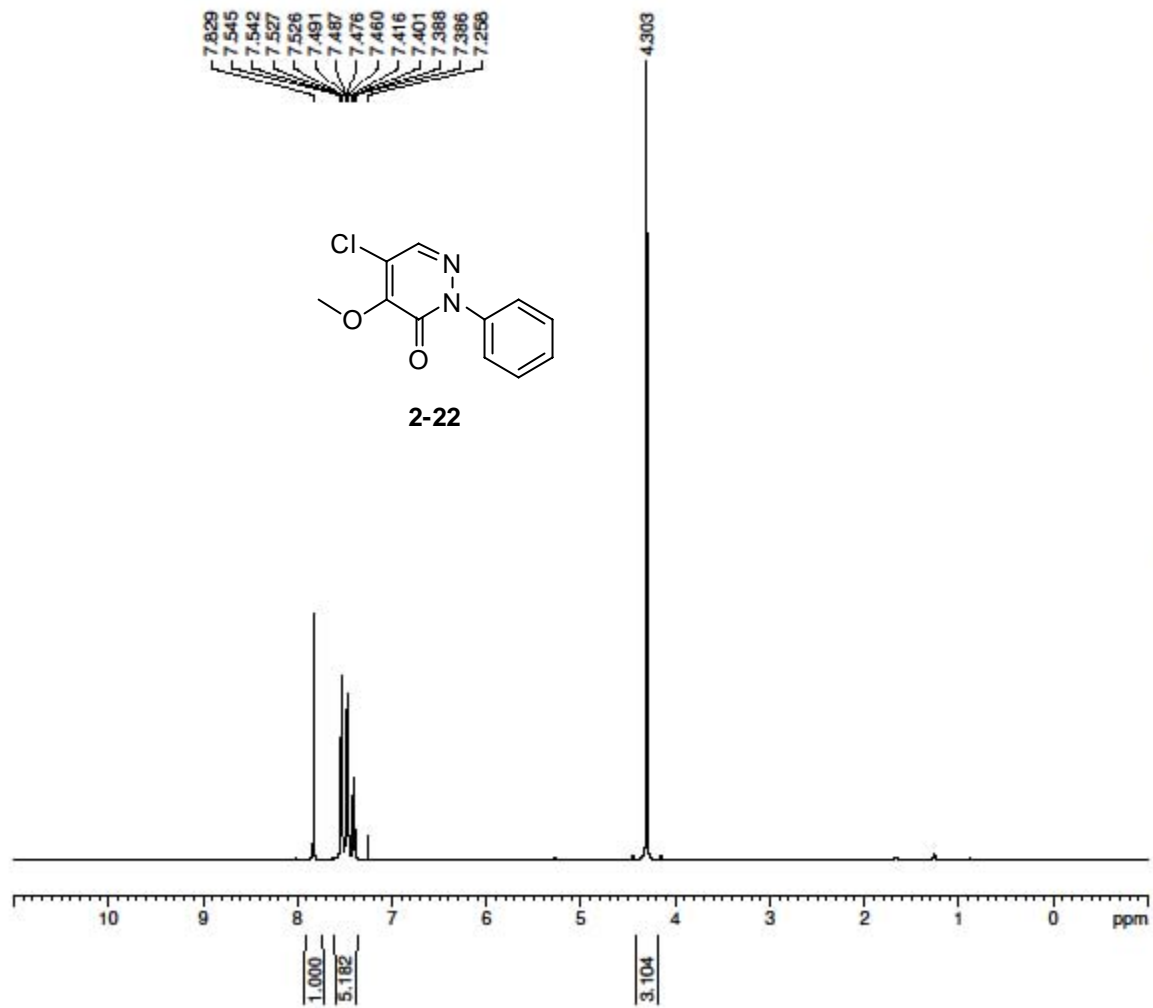

Current Data Parameters  
 NAME Ph\_OMe\_A\_re  
 EXPNO 1  
 PROCNO 1

F2 - Acquisition Parameters  
 Date\_ 20081030  
 Time 11.12  
 INSTRUM avance500  
 PROBHD 5 mm bb-Z 2800  
 PULPROG zg30  
 TD 32768  
 SOLVENT CDCl3  
 NS 8  
 DS 0  
 SWH 10000.000 Hz  
 FIDRES 0.305176 Hz  
 AQ 1.6385000 sec  
 RG 71.8  
 DW 50.000 usec  
 DE 6.00 usec  
 TE 295.3 K  
 D1 2.00000000 sec  
 MCREST 0.00000000 sec  
 MCWRK 0.01500000 sec

CHANNEL f1  
 NUC1 1H  
 P1 12.00 usec  
 PL1 0.00 dB  
 SFO1 500.3330020 MHz

F2 - Processing parameters  
 SI 32768  
 SF 500.3300220 MHz  
 WDW EM  
 SSB 0  
 LB 0.30 Hz  
 GB 0  
 PC 1.00

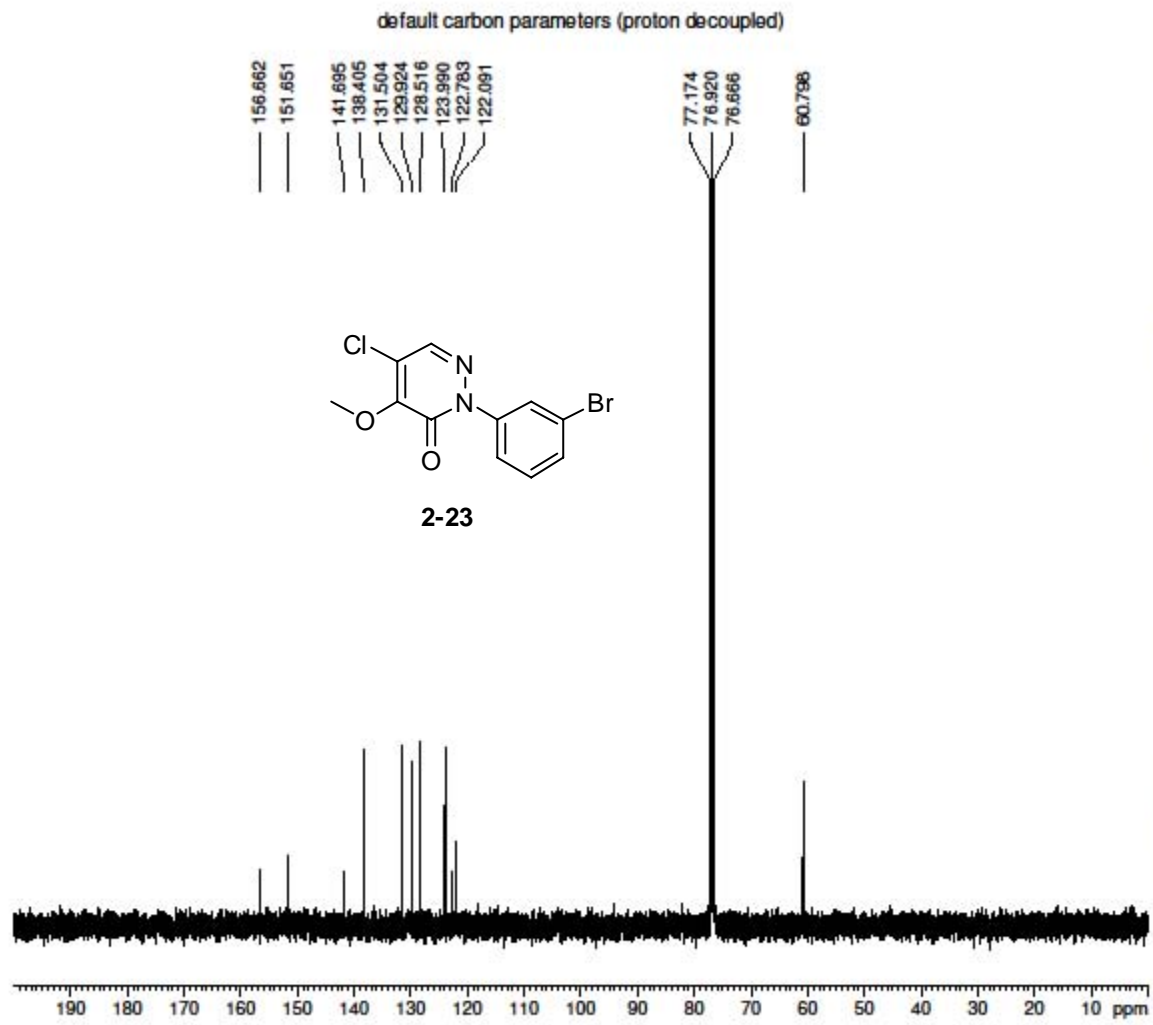

Current Data Parameters  
 NAME 3BrPh\_OMe\_A  
 EXPNO 2  
 PROCNO 1

F2 - Acquisition Parameters  
 Date\_ 20081030  
 Time 11.21  
 INSTRUM avance500  
 PROBHD 5 mm bb-Z 2800  
 PULPROG zgpg30  
 TD 65536  
 SOLVENT CDCl3  
 NS 47  
 DS 0  
 SWH 32679.738 Hz  
 FIDRES 0.498653 Hz  
 AQ 1.0027661 sec  
 RG 13004  
 DW 15.300 usec  
 DE 6.00 usec  
 TE 295.4 K  
 D1 2.00000000 sec  
 d11 0.03000000 sec  
 MCREST 0.00000000 sec  
 MCWRK 0.01500000 sec

----- CHANNEL f1 -----  
 NUC1 13C  
 P1 5.25 usec  
 PL1 0.00 dB  
 SFO1 125.8231939 MHz

----- CHANNEL f2 -----  
 CPDPRG2 waltz16  
 NUC2 1H  
 PCPD2 105.00 usec  
 PL2 120.00 dB  
 PL12 19.00 dB  
 SFO2 500.3320013 MHz

F2 - Processing parameters  
 SI 65536  
 SF 125.8080969 MHz  
 WDW EM  
 SSB 0  
 LB 1.00 Hz  
 GB 0  
 PC 1.40

default proton parameters

7.835  
7.749  
7.745  
7.742  
7.544  
7.542  
7.530  
7.528  
7.527  
7.362  
7.346  
7.330  
7.258

4.307

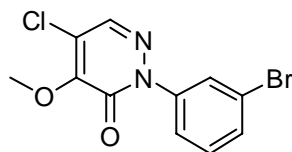

2-23

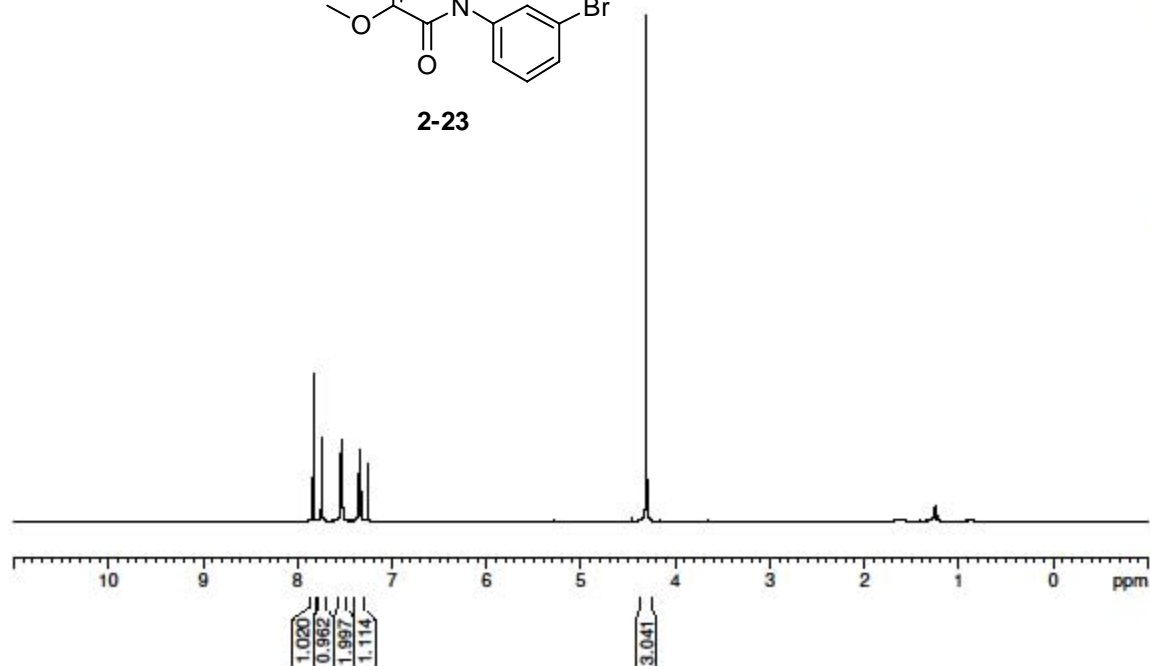

Current Data Parameters  
NAME 3BrPh\_OMe\_A  
EXPNO 1  
PROCNO 1

F2 - Acquisition Parameters  
Date\_ 20081030  
Time 11.19  
INSTRUM avance500  
PROBHD 5 mm bb-Z 2800  
PULPROG zg30  
TD 32768  
SOLVENT CDCl3  
NS 4  
DS 0  
SWH 10000.000 Hz  
FIDRES 0.305176 Hz  
AQ 1.6385000 sec  
RG 128  
DW 50.000 usec  
DE 6.00 usec  
TE 295.2 K  
D1 2.00000000 sec  
MCREST 0.00000000 sec  
MCWRK 0.01500000 sec

CHANNEL f1  
NUC1 1H  
P1 12.00 usec  
PL1 0.00 dB  
SFO1 500.3330020 MHz

F2 - Processing parameters  
SI 32768  
SF 500.3300220 MHz  
WDW EM  
SSB 0  
LB 0.30 Hz  
GB 0  
PC 1.00

default carbon parameters (proton decoupled)

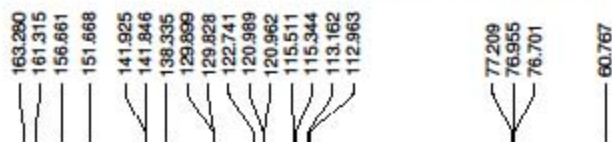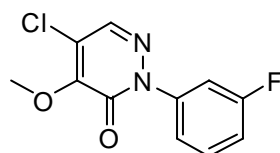

2-24

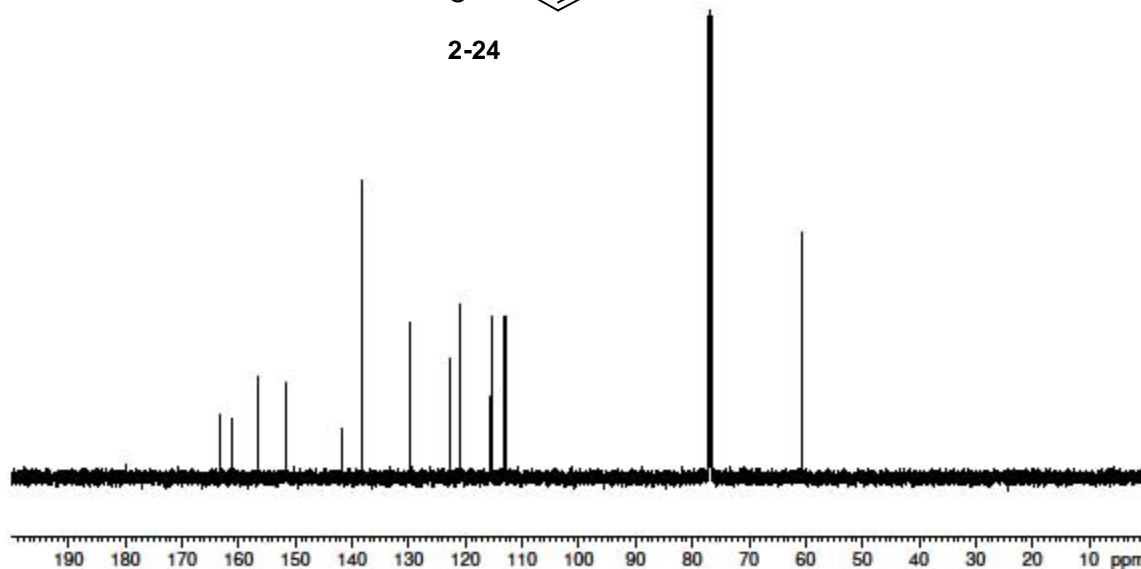

Current Data Parameters  
NAME 3F-Ph\_OMe\_A  
EXPNO 2  
PROCNO 1

F2 - Acquisition Parameters  
Date\_ 20081030  
Time 11.27  
INSTRUM avance500  
PROBHD 5 mm bb-Z 2800  
PULPROG zgpg30  
TD 65536  
SOLVENT CDCl3  
NS 45  
DS 0  
SWH 32679.738 Hz  
FIDRES 0.498653 Hz  
AQ 1.0027661 sec  
RG 4096  
DW 15.300 usec  
DE 6.00 usec  
TE 295.4 K  
D1 2.00000000 sec  
d11 0.03000000 sec  
MCREST 0.00000000 sec  
MCWRK 0.01500000 sec

----- CHANNEL f1 -----  
NUC1 13C  
P1 5.25 usec  
PL1 0.00 dB  
SFO1 125.8231939 MHz

----- CHANNEL f2 -----  
CPDPRG2 waltz16  
NUC2 1H  
PCPD2 105.00 usec  
PL2 120.00 dB  
PL12 19.00 dB  
SFO2 500.3320013 MHz

F2 - Processing parameters  
SI 65536  
SF 125.8080969 MHz  
WDW EM  
SSB 0  
LB 1.00 Hz  
GB 0  
PC 1.40



default proton parameters

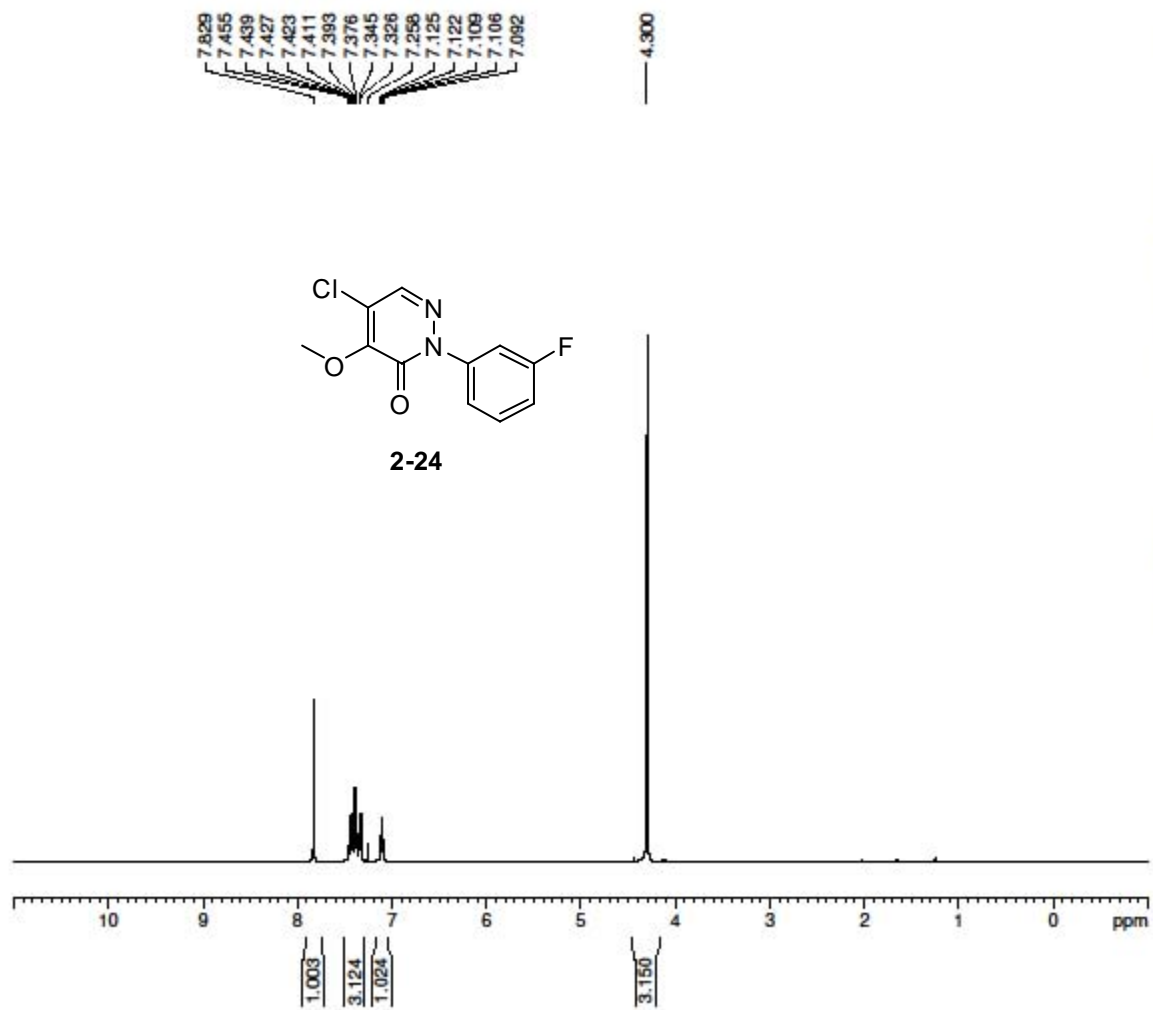

Current Data Parameters  
NAME 3F-Ph\_OMe\_A  
EXPNO 1  
PROCNO 1

F2 - Acquisition Parameters  
Date\_ 20081030  
Time 11.25  
INSTRUM avance500  
PROBHD 5 mm bb-Z 2800  
PULPROG zg30  
TD 32768  
SOLVENT CDCl3  
NS 4  
DS 0  
SWH 10000.000 Hz  
FIDRES 0.305176 Hz  
AQ 1.6385000 sec  
RG 90.5  
DW 50.000 usec  
DE 6.00 usec  
TE 295.3 K  
D1 2.00000000 sec  
MCREST 0.00000000 sec  
MCWRK 0.01500000 sec

CHANNEL f1  
NUC1 1H  
P1 12.00 usec  
PL1 0.00 dB  
SFO1 500.3330020 MHz

F2 - Processing parameters  
SI 32768  
SF 500.3300220 MHz  
WDW EM  
SSB 0  
LB 0.30 Hz  
GB 0  
PC 1.00

default carbon parameters (proton decoupled)

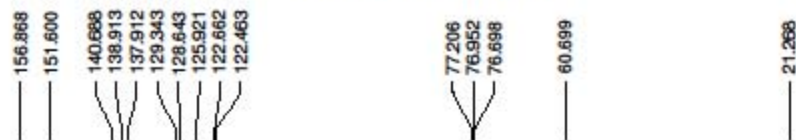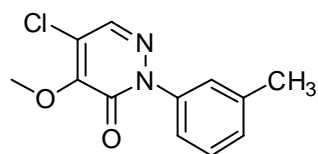

2-25

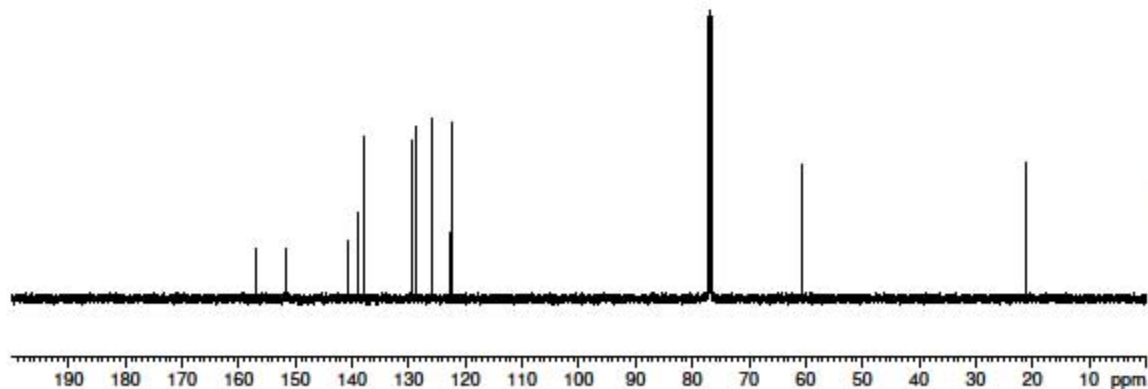

Current Data Parameters  
NAME 3Tolyl\_OMe\_A  
EXPNO 2  
PROCNO 1

F2 - Acquisition Parameters  
Date\_ 20081030  
Time 10.29  
INSTRUM avance500  
PROBHD 5 mm bb-Z 2800  
PULPROG zgpg30  
TD 65536  
SOLVENT CDCl3  
NS 78  
DS 0  
SWH 32679.738 Hz  
FIDRES 0.498653 Hz  
AQ 1.0027661 sec  
RG 4096  
DW 15.300 usec  
DE 6.00 usec  
TE 295.4 K  
D1 2.00000000 sec  
d11 0.03000000 sec  
MCREST 0.00000000 sec  
MCWRK 0.01500000 sec

----- CHANNEL f1 -----  
NUC1 13C  
P1 5.25 usec  
PL1 0.00 dB  
SFO1 125.8231939 MHz

----- CHANNEL f2 -----  
CPDPRG2 waltz16  
NUC2 1H  
PCPD2 105.00 usec  
PL2 120.00 dB  
PL12 19.00 dB  
SFO2 500.3320013 MHz

F2 - Processing parameters  
SI 65536  
SF 125.8080969 MHz  
WDW EM  
SSB 0  
LB 1.00 Hz  
GB 0  
PC 1.40

default proton parameters

7.822  
7.379  
7.364  
7.349  
7.329  
7.305  
7.258  
7.228  
7.213

4.306

2.408

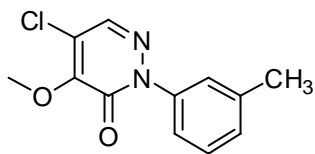

2-25

10 9 8 7 6 5 4 3 2 1 0 ppm

1.004  
3.224  
0.998

3.207

3.266

Current Data Parameters  
NAME 3Tolyl\_OMe\_A  
EXPNO 1  
PROCNO 1

F2 - Acquisition Parameters  
Date\_ 20081030  
Time 10.25  
INSTRUM avance500  
PROBHD 5 mm bb-Z 2800  
PULPROG zg30  
TD 32768  
SOLVENT CDCl3  
NS 8  
DS 0  
SWH 10000.000 Hz  
FIDRES 0.305176 Hz  
AQ 1.6385000 sec  
RG 90.5  
DW 50.000 usec  
DE 6.00 usec  
TE 295.1 K  
D1 2.00000000 sec  
MCREST 0.00000000 sec  
MCWRK 0.01500000 sec

CHANNEL f1  
NUC1 1H  
P1 12.00 usec  
PL1 0.00 dB  
SFO1 500.3330020 MHz

F2 - Processing parameters  
SI 32768  
SF 500.3300220 MHz  
WDW EM  
SSB 0  
LB 0.30 Hz  
GB 0  
PC 1.00

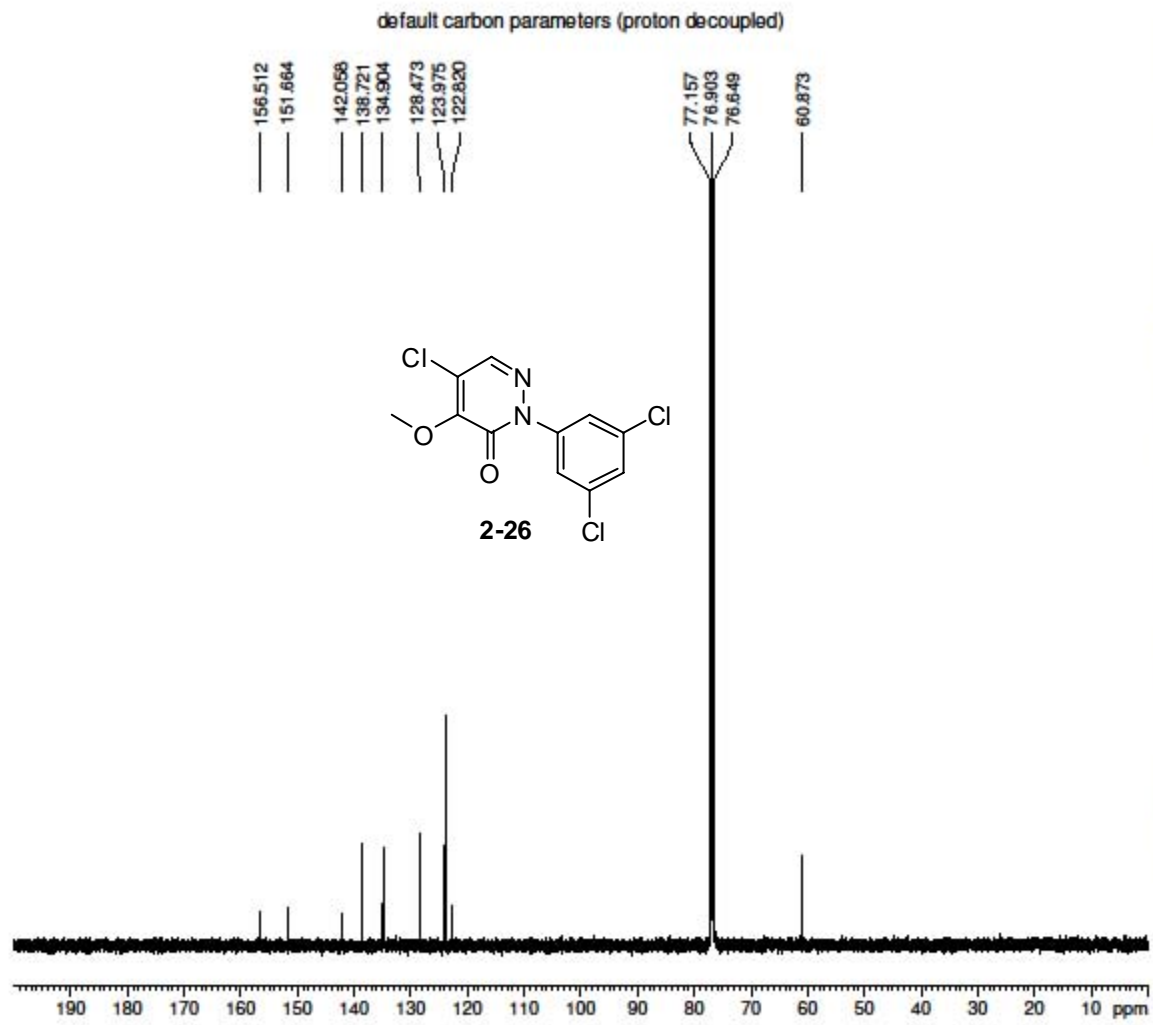

Current Data Parameters  
 NAME 3,5-Dichloro\_OMe\_A  
 EXPNO 2  
 PROCNO 1

F2 - Acquisition Parameters  
 Date\_ 20081030  
 Time 10.44  
 INSTRUM avance500  
 PROBHD 5 mm bb-Z 2800  
 PULPROG zgpg30  
 TD 65536  
 SOLVENT CDCl3  
 NS 496  
 DS 0  
 SWH 32679.738 Hz  
 FIDRES 0.498653 Hz  
 AQ 1.0027661 sec  
 RG 4096  
 DW 15.300 usec  
 DE 6.00 usec  
 TE 295.3 K  
 D1 2.00000000 sec  
 d11 0.03000000 sec  
 MCREST 0.00000000 sec  
 MCWRK 0.01500000 sec

----- CHANNEL f1 -----  
 NUC1 13C  
 P1 5.25 usec  
 PL1 0.00 dB  
 SFO1 125.8231939 MHz

----- CHANNEL f2 -----  
 CPDPRG2 waltz16  
 NUC2 1H  
 PCPD2 105.00 usec  
 PL2 120.00 dB  
 PL12 19.00 dB  
 SFO2 500.3320013 MHz

F2 - Processing parameters  
 SI 65536  
 SF 125.8080969 MHz  
 WDW EM  
 SSB 0  
 LB 1.00 Hz  
 GB 0  
 PC 1.40

default proton parameters

7.840  
7.561  
7.557  
7.400  
7.397  
7.384  
7.258

4.311

1.554  
1.250

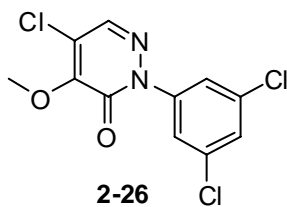

Current Data Parameters  
NAME 3,5-Dichloro\_OMe\_A  
EXPNO 1  
PROCNO 1

F2 - Acquisition Parameters  
Date\_ 20081030  
Time 10.42  
INSTRUM avance500  
PROBHD 5 mm bb-Z 2800  
PULPROG zg30  
TD 32768  
SOLVENT CDCl3  
NS 8  
DS 0  
SWH 10000.000 Hz  
FIDRES 0.305176 Hz  
AQ 1.6385000 sec  
RG 181  
DW 50.000 usec  
DE 6.00 usec  
TE 295.2 K  
D1 2.00000000 sec  
MCREST 0.00000000 sec  
MCWRK 0.01500000 sec

CHANNEL f1  
NUC1 1H  
P1 12.00 usec  
PL1 0.00 dB  
SFO1 500.3330020 MHz

F2 - Processing parameters  
SI 32768  
SF 500.3300220 MHz  
WDW EM  
SSB 0  
LB 0.30 Hz  
GB 0  
PC 1.00

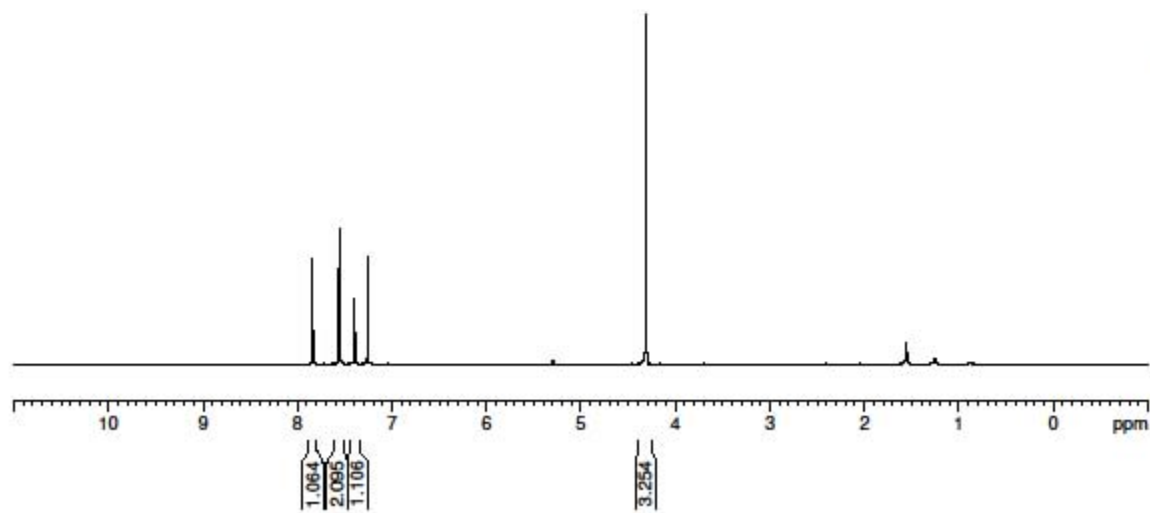

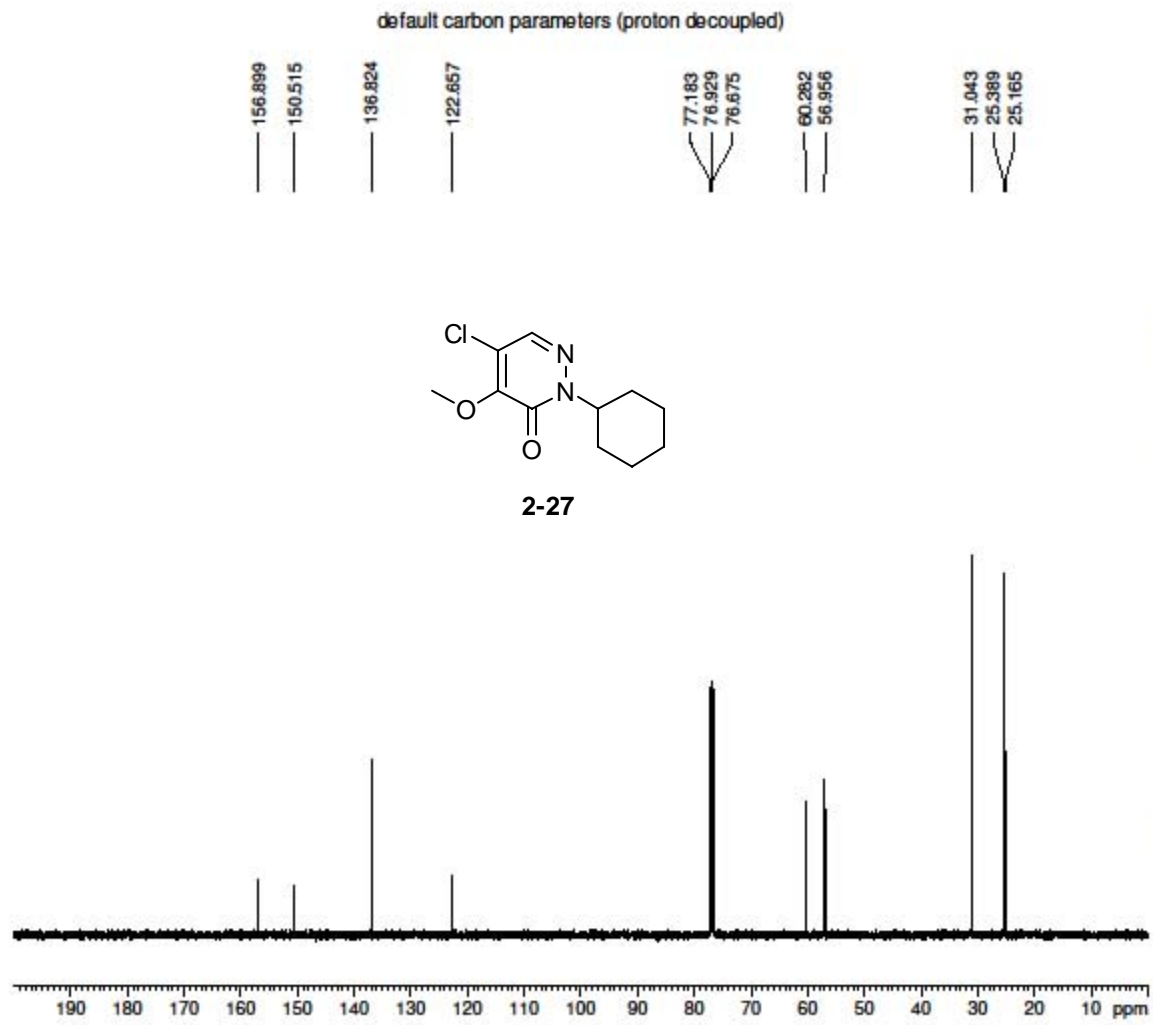

Current Data Parameters  
 NAME Cyclohexyl\_OMe\_A  
 EXPNO 2  
 PROCNO 1

F2 - Acquisition Parameters  
 Date\_ 20081030  
 Time 10.37  
 INSTRUM avance500  
 PROBHD 5 mm bb-Z 2800  
 PULPROG zgpg30  
 TD 65536  
 SOLVENT CDCl3  
 NS 62  
 DS 0  
 SWH 32679.738 Hz  
 FIDRES 0.498653 Hz  
 AQ 1.0027661 sec  
 RG 4096  
 DW 15.300 usec  
 DE 6.00 usec  
 TE 295.4 K  
 D1 2.00000000 sec  
 d11 0.03000000 sec  
 MCREST 0.00000000 sec  
 MCWRK 0.01500000 sec

----- CHANNEL f1 -----  
 NUC1 13C  
 P1 5.25 usec  
 PL1 0.00 dB  
 SFO1 125.8231939 MHz

----- CHANNEL f2 -----  
 CPDPRG2 waltz16  
 NUC2 1H  
 PCPD2 105.00 usec  
 PL2 120.00 dB  
 PL12 19.00 dB  
 SFO2 500.3320013 MHz

F2 - Processing parameters  
 SI 65536  
 SF 125.8080969 MHz  
 WDW EM  
 SSB 0  
 LB 1.00 Hz  
 GB 0  
 PC 1.40

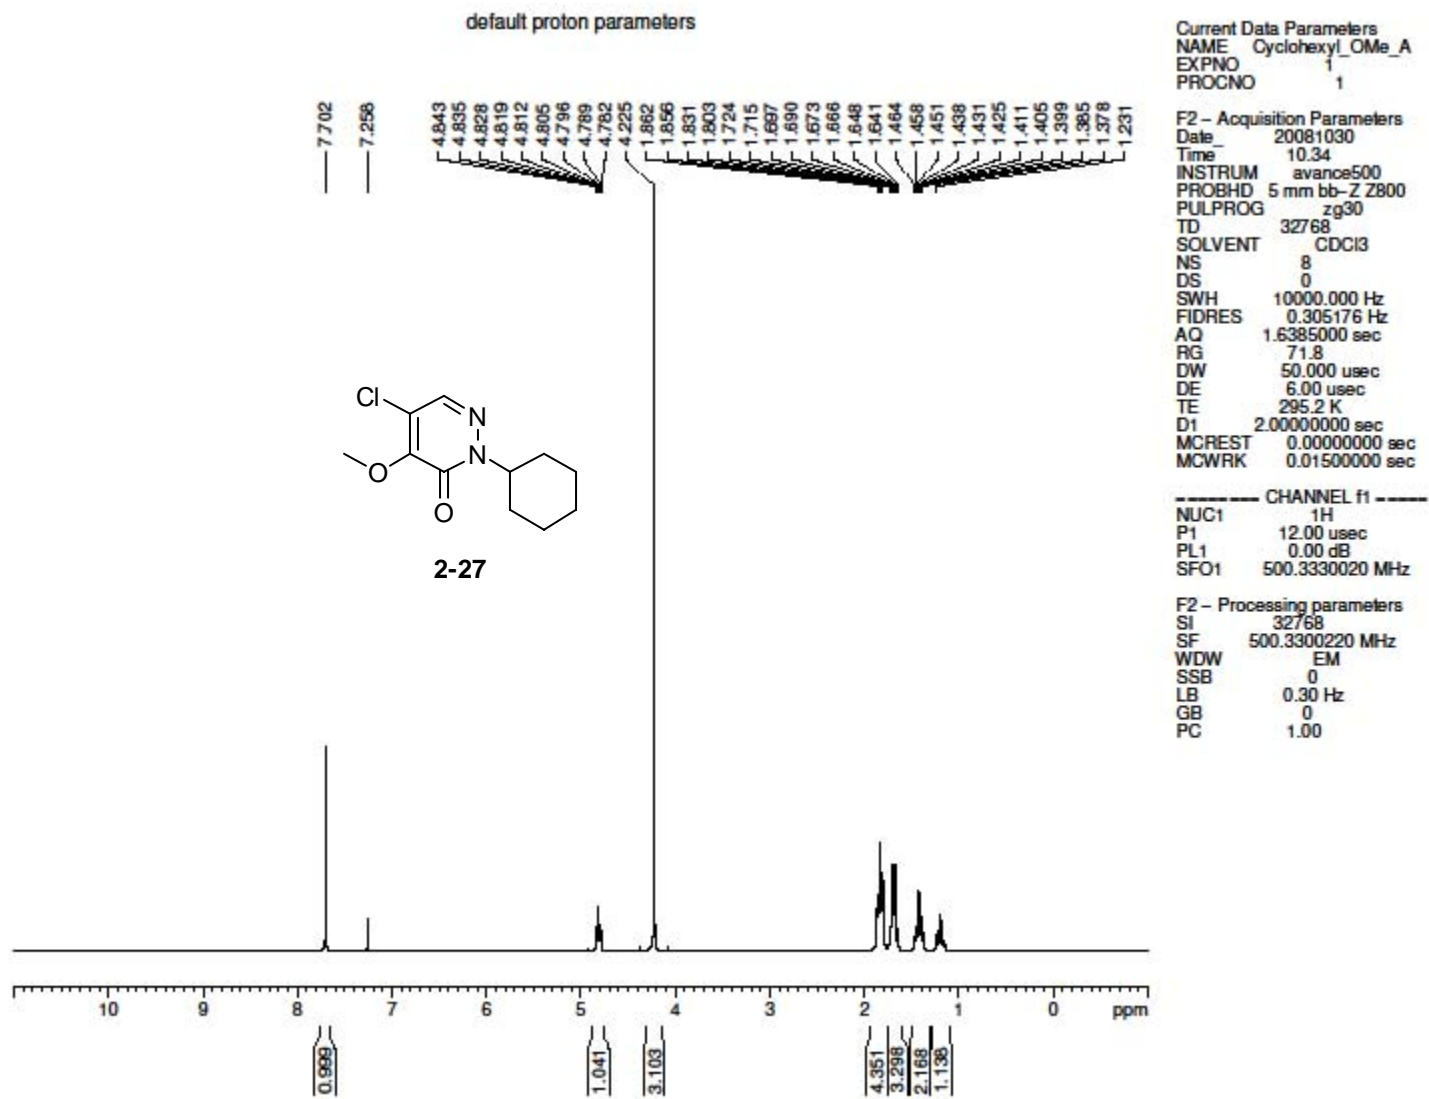

Account no. MEJM16  
Ph\_OEt\_A

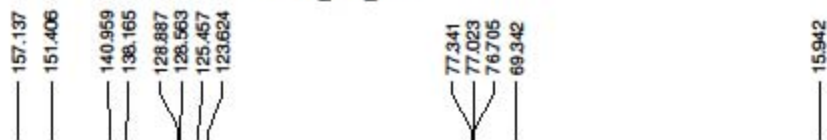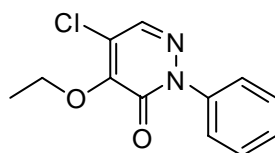

2-28

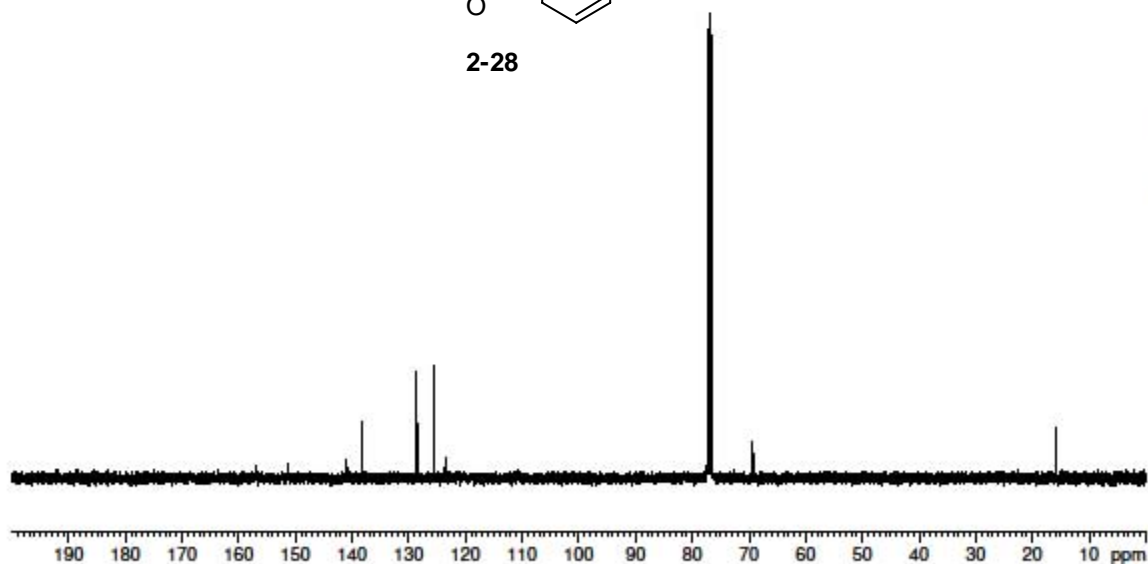

Current Data Parameters  
NAME 101608  
EXPNO 121  
PROCNO 1

F2 - Acquisition Parameters  
Date\_ 20081016  
Time 13.07  
INSTRUM arx400  
PROBHD 5 mm QNP 1H  
PULPROG zgpg30  
TD 65536  
SOLVENT CDCl3  
NS 256  
DS 0  
SWH 27777.777 Hz  
FIDRES 0.423855 Hz  
AQ 1.1796980 sec  
RG 32768  
DW 18.000 usec  
DE 25.71 usec  
TE 300.0 K  
D12 0.0000200 sec  
DL5 23.50 dB  
CPDPRG waltz16  
P31 100.00 usec  
D1 2.0000000 sec  
P1 8.25 usec  
SFO1 100.6248445 MHz  
NUCLEUS 13C  
D11 0.0300000 sec

F2 - Processing parameters  
SI 65536  
SF 100.6127710 MHz  
WDW EM  
SSB 0  
LB 1.00 Hz  
GB 0  
PC 1.40



Account no. MEJM16  
Ph\_OEt\_A

Current Data Parameters  
NAME 101608  
EXPNO 120  
PROCNO 1

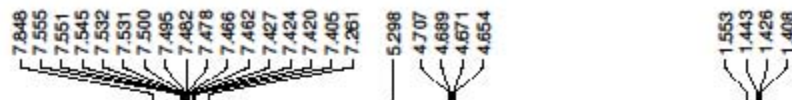

F2 - Acquisition Parameters  
Date\_ 20081016  
Time 12.53  
INSTRUM ax400  
PROBHD 5 mm QNP 1H  
PULPROG zg30  
TD 65536  
SOLVENT CDCl3  
NS 8  
DS 0  
SWH 8064.516 Hz  
FIDRES 0.123055 Hz  
AQ 4.0632820 sec  
RG 2048  
DW 62.000 usec  
DE 88.57 usec  
TE 300.0 K  
D1 2.0000000 sec  
P1 7.50 usec  
SFO1 400.1324008 MHz  
NUCLEUS 1H

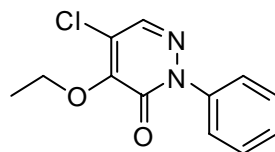

2-28

F2 - Processing parameters  
SI 65536  
SF 400.1300173 MHz  
WDW EM  
SSB 0  
LB 0.30 Hz  
GB 0  
PC 1.00

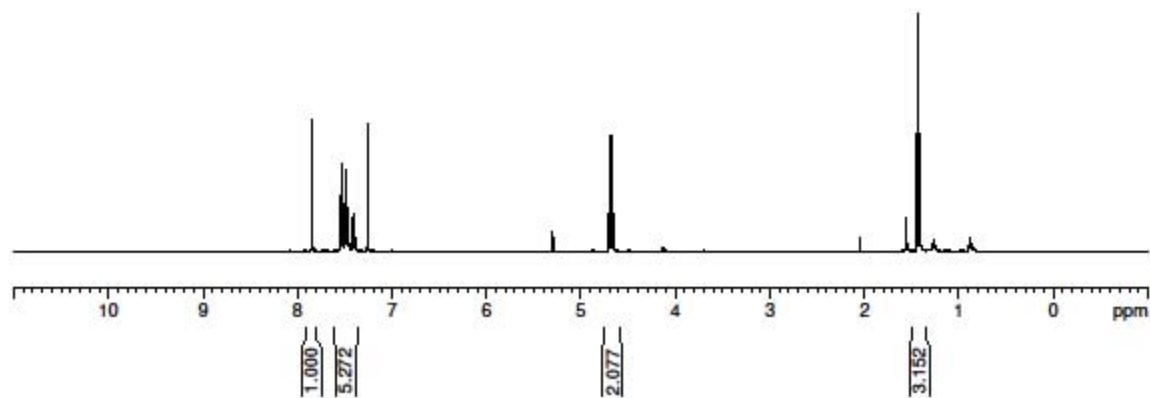

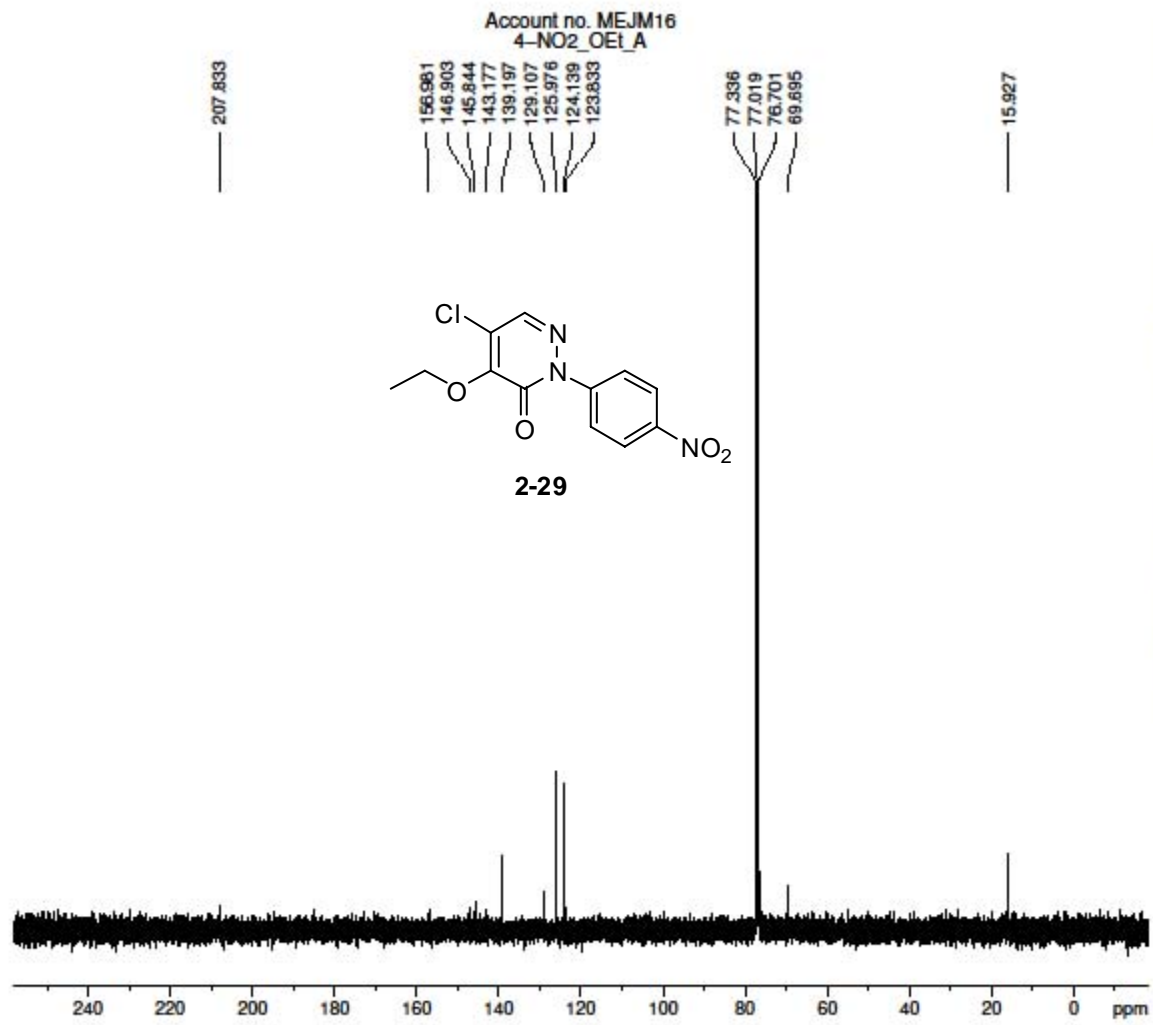

Current Data Parameters  
 NAME 102108  
 EXPNO 81  
 PROCNO 1

F2 - Acquisition Parameters  
 Date\_ 20081021  
 Time 15.33  
 INSTRUM arx400  
 PROBHD 5 mm QNP 1H  
 PULPROG zgpg30  
 TD 65536  
 SOLVENT CDCl3  
 NS 256  
 DS 0  
 SWH 27777.777 Hz  
 FIDRES 0.423855 Hz  
 AQ 1.1796980 sec  
 RG 32768  
 DW 18.000 usec  
 DE 25.71 usec  
 TE 300.0 K  
 D12 0.0000200 sec  
 DL5 23.50 dB  
 CPDPRG waltz16  
 P31 100.00 usec  
 D1 2.0000000 sec  
 P1 8.25 usec  
 SFO1 100.6248445 MHz  
 NUCLEUS 13C  
 D11 0.0300000 sec

F2 - Processing parameters  
 SI 65536  
 SF 100.6127710 MHz  
 WDW EM  
 SSB 0  
 LB 1.00 Hz  
 GB 0  
 PC 1.40

Account no. MEJM16  
4-NO<sub>2</sub>\_OEt\_A

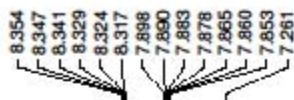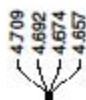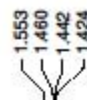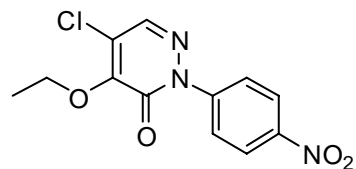

2-29

Current Data Parameters  
NAME 102108  
EXPNO 80  
PROCNO 1

F2 - Acquisition Parameters  
Date\_ 20081021  
Time 15.19  
INSTRUM arx400  
PROBHD 5 mm QNP 1H  
PULPROG zg30  
TD 65536  
SOLVENT CDCl<sub>3</sub>  
NS 8  
DS 0  
SWH 8064.516 Hz  
FIDRES 0.123055 Hz  
AQ 4.0632820 sec  
RG 4096  
DW 62.000 usec  
DE 88.57 usec  
TE 300.0 K  
D1 2.0000000 sec  
P1 7.50 usec  
SFO1 400.1324008 MHz  
NUCLEUS 1H

F2 - Processing parameters  
SI 65536  
SF 400.1300173 MHz  
WDW EM  
SSB 0  
LB 0.30 Hz  
GB 0  
PC 1.00

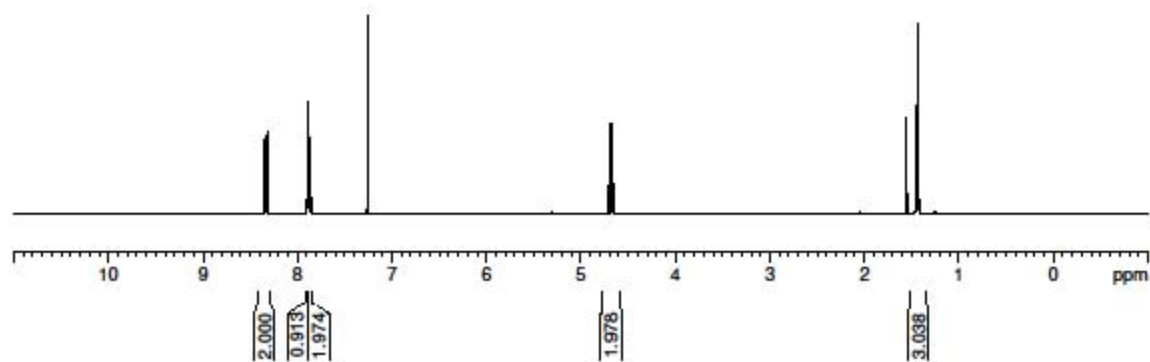

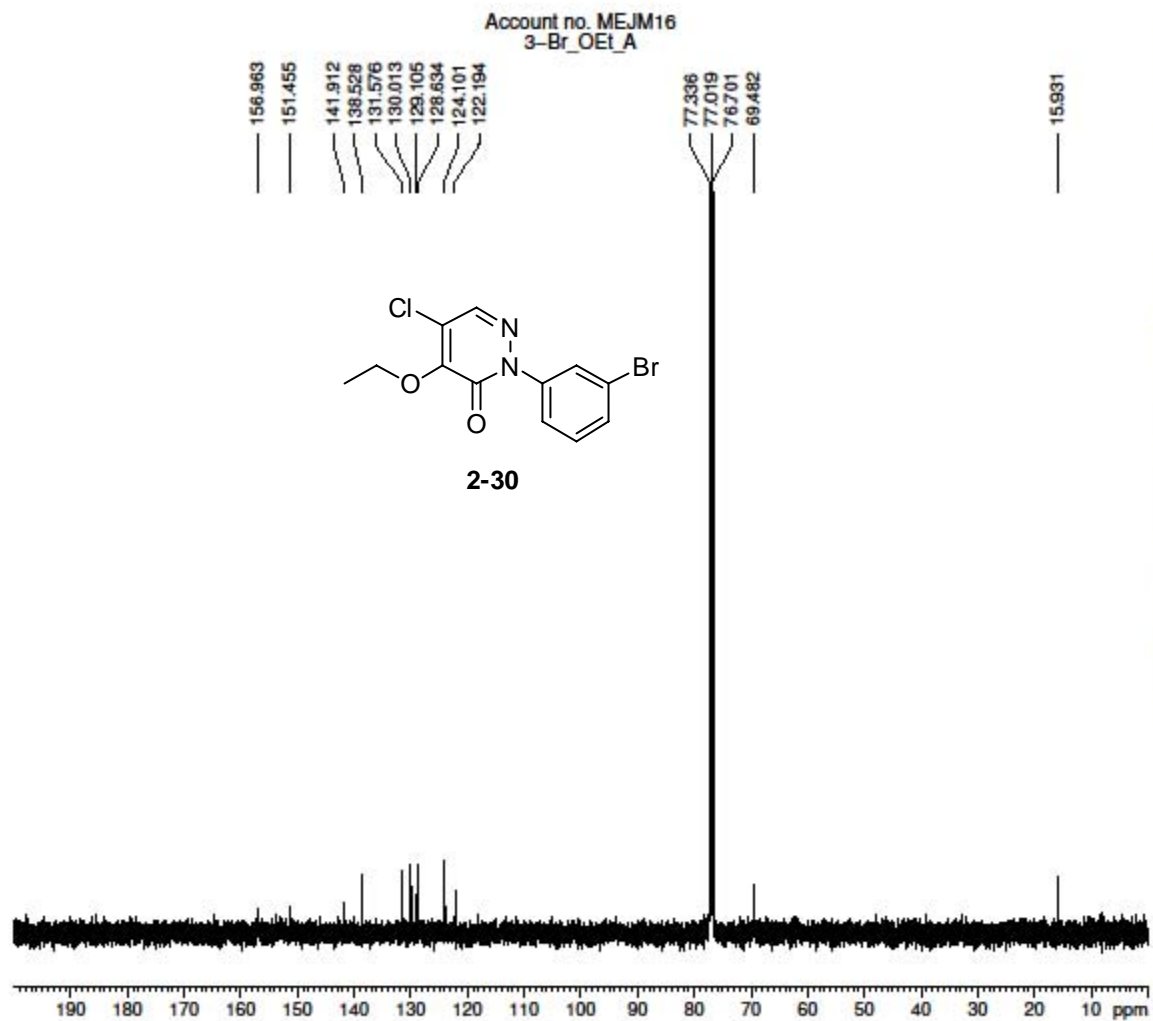

Current Data Parameters  
NAME 102108  
EXPNO 91  
PROCNO 1

F2 - Acquisition Parameters  
Date\_ 20081021  
Time 15.54  
INSTRUM ax400  
PROBHD 5 mm QNP 1H  
PULPROG zgpg30  
TD 65536  
SOLVENT CDCl3  
NS 256  
DS 0  
SWH 27777.777 Hz  
FIDRES 0.423855 Hz  
AQ 1.1796980 sec  
RG 32768  
DW 18.000 usec  
DE 25.71 usec  
TE 300.0 K  
D12 0.0000200 sec  
DL5 23.50 dB  
CPDPRG waltz16  
P31 100.00 usec  
D1 2.0000000 sec  
P1 8.25 usec  
SFO1 100.6248445 MHz  
NUCLEUS 13C  
D11 0.0300000 sec

F2 - Processing parameters  
SI 65536  
SF 100.6127710 MHz  
WDW EM  
SSB 0  
LB 1.00 Hz  
GB 0  
PC 1.40

Account no. MEJM16  
3-Br\_OEt\_A

Current Data Parameters  
NAME 102108  
EXPNO 90  
PROCNO 1

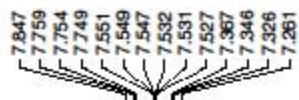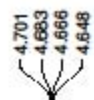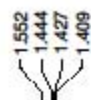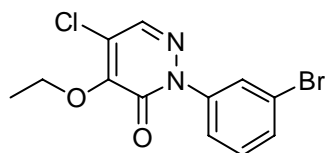

2-30

F2 - Acquisition Parameters  
Date\_ 20081021  
Time 15.40  
INSTRUM ax400  
PROBHD 5 mm QNP 1H  
PULPROG zg30  
TD 65536  
SOLVENT CDCl3  
NS 8  
DS 0  
SWH 8064.516 Hz  
FIDRES 0.123055 Hz  
AQ 4.0632820 sec  
RG 4096  
DW 62.000 usec  
DE 88.57 usec  
TE 300.0 K  
D1 2.0000000 sec  
P1 7.50 usec  
SFO1 400.1324008 MHz  
NUCLEUS 1H

F2 - Processing parameters  
SI 65536  
SF 400.1300173 MHz  
WDW EM  
SSB 0  
LB 0.30 Hz  
GB 0  
PC 1.00

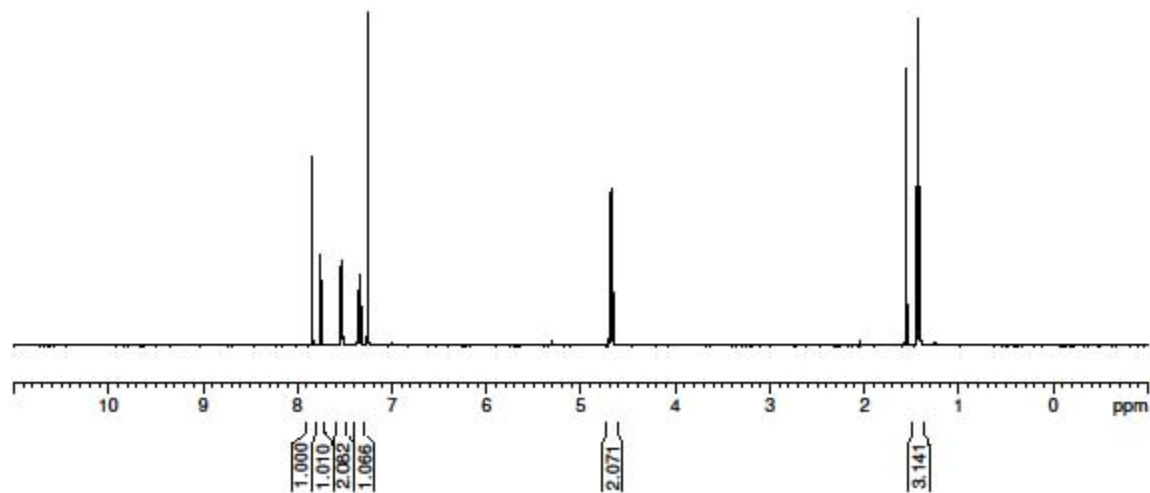

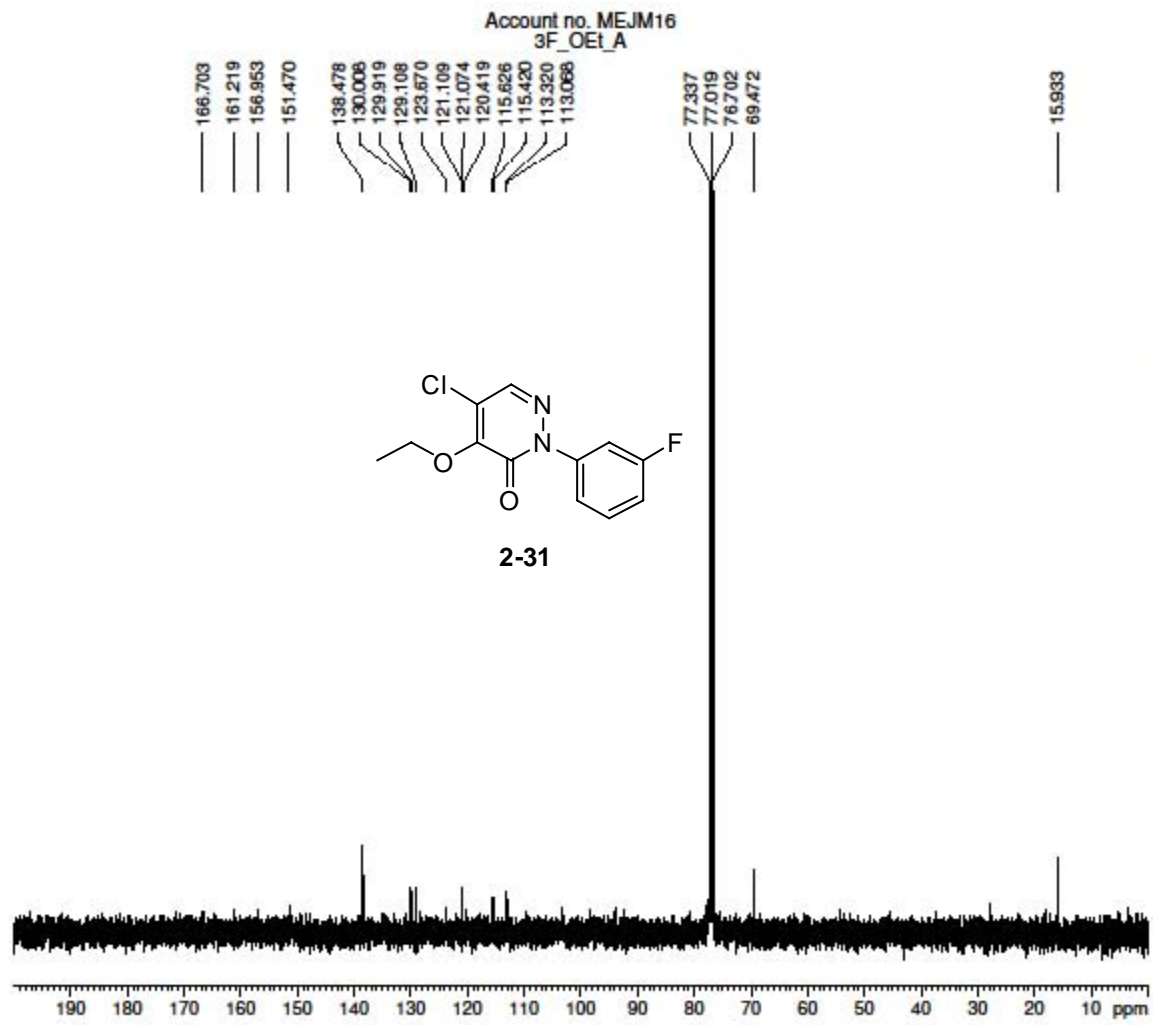

Current Data Parameters  
NAME 102108  
EXPNO 301  
PROCNO 1

F2 - Acquisition Parameters  
Date\_ 20081020  
Time 23.53  
INSTRUM arx400  
PROBHD 5 mm QNP 1H  
PULPROG zgpg30  
TD 65536  
SOLVENT CDCl3  
NS 256  
DS 0  
SWH 27777.777 Hz  
FIDRES 0.423855 Hz  
AQ 1.1796980 sec  
RG 32768  
DW 18.000 usec  
DE 25.71 usec  
TE 300.0 K  
D12 0.0000200 sec  
DL5 23.50 dB  
CPDPRG waltz16  
P31 100.00 usec  
D1 2.0000000 sec  
P1 8.25 usec  
SFO1 100.6248445 MHz  
NUCLEUS 13C  
D11 0.0300000 sec

F2 - Processing parameters  
SI 65536  
SF 100.6127710 MHz  
WDW EM  
SSB 0  
LB 1.00 Hz  
GB 0  
PC 1.40

Account no. MEJM16  
3F\_OEt\_A

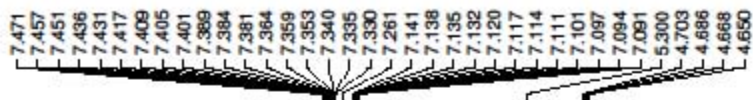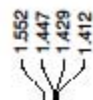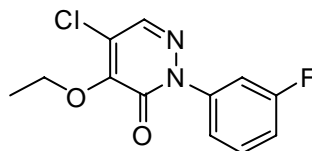

2-31

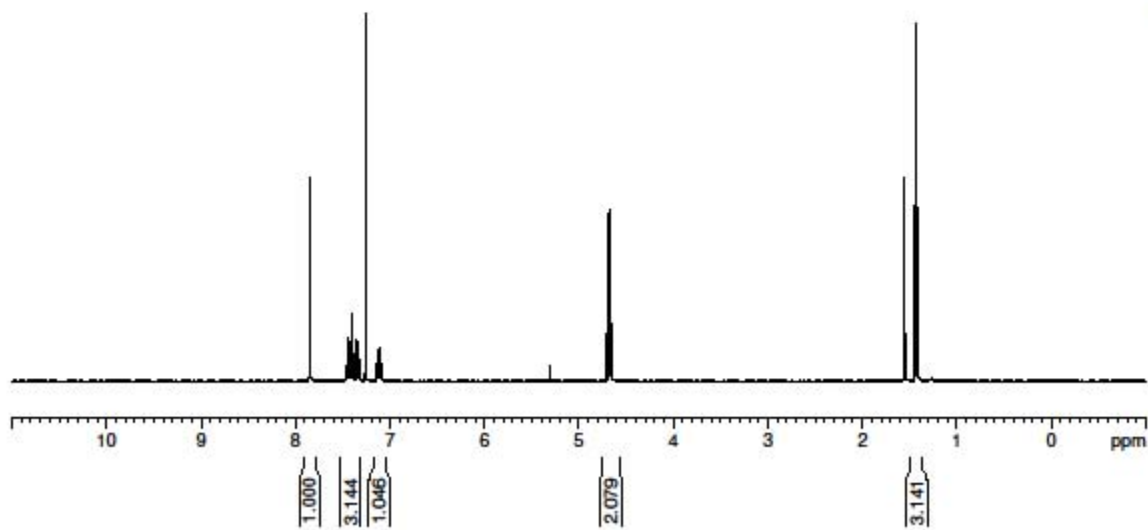

Current Data Parameters  
NAME 102108  
EXPNO 300  
PROCNO 1

F2 - Acquisition Parameters  
Date\_ 20081020  
Time 23.39  
INSTRUM ax400  
PROBHD 5 mm QNP 1H  
PULPROG zg30  
TD 65536  
SOLVENT CDCl3  
NS 8  
DS 0  
SWH 8064.516 Hz  
FIDRES 0.123055 Hz  
AQ 4.0632820 sec  
RG 4096  
DW 62.000 usec  
DE 88.57 usec  
TE 300.0 K  
D1 2.00000000 sec  
P1 7.50 usec  
SFO1 400.1324008 MHz  
NUCLEUS 1H

F2 - Processing parameters  
SI 65536  
SF 400.1300173 MHz  
WDB EM  
SSB 0  
LB 0.30 Hz  
GB 0  
PC 1.00

Account no. MEJM16  
3Toly\_OEt\_A

157.149  
151.366  
140.881  
139.011  
138.043  
129.418  
129.101  
128.742  
126.095  
123.595  
122.573

77.349  
77.031  
76.713  
69.315

21.377  
15.943

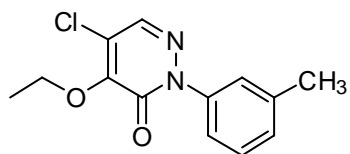

2-32

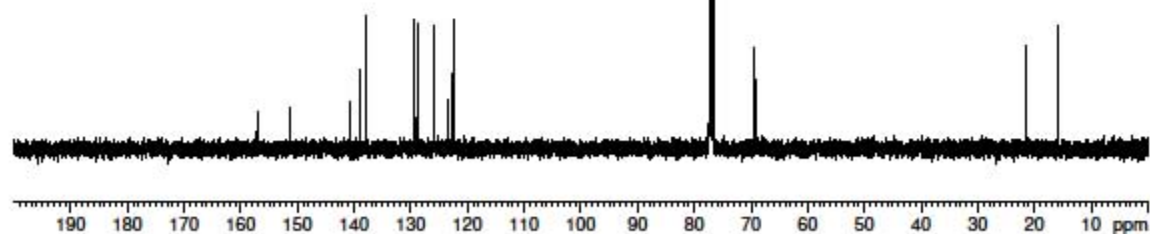

Current Data Parameters  
NAME 102108  
EXPNO 311  
PROCNO 1

F2 - Acquisition Parameters  
Date\_ 20081021  
Time 0.14  
INSTRUM arx400  
PROBHD 5 mm QNP 1H  
PULPROG zgpg30  
TD 65536  
SOLVENT CDCl3  
NS 256  
DS 0  
SWH 27777.777 Hz  
FIDRES 0.423855 Hz  
AQ 1.1796980 sec  
RG 32768  
DW 18.000 usec  
DE 25.71 usec  
TE 300.0 K  
D12 0.0000200 sec  
DL5 23.50 dB  
CPDPRG waltz16  
P31 100.00 usec  
D1 2.0000000 sec  
P1 8.25 usec  
SFO1 100.6248445 MHz  
NUCLEUS 13C  
D11 0.0300000 sec

F2 - Processing parameters  
SI 65536  
SF 100.6127710 MHz  
WDW EM  
SSB 0  
LB 1.00 Hz  
GB 0  
PC 1.40



Account no. MEJM16  
3Toly\_OEL\_A

Current Data Parameters  
NAME 102108  
EXPNO 310  
PROCNO 1

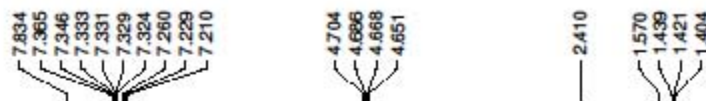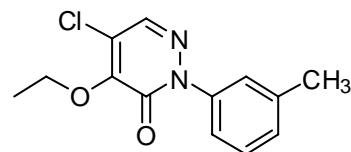

2-32

F2 - Acquisition Parameters  
Date\_ 20081021  
Time 0.00  
INSTRUM anx400  
PROBHD 5 mm QNP 1H  
PULPROG zg30  
TD 65536  
SOLVENT CDCl3  
NS 8  
DS 0  
SWH 8064.516 Hz  
FIDRES 0.123055 Hz  
AQ 4.0632820 sec  
RG 2048  
DW 62.000 usec  
DE 88.57 usec  
TE 300.0 K  
D1 2.00000000 sec  
P1 7.50 usec  
SFO1 400.1324008 MHz  
NUCLEUS 1H

F2 - Processing parameters  
SI 65536  
SF 400.1300173 MHz  
WDW EM  
SSB 0  
LB 0.30 Hz  
GB 0  
PC 1.00

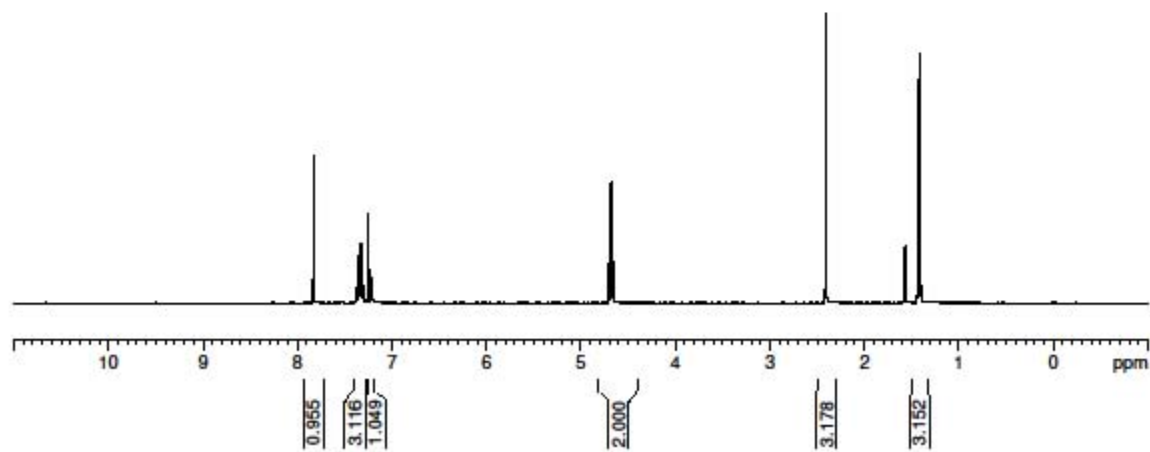

Account no. MEJM16  
3,5-dichloro\_OEt\_A

163.740  
156.797  
151.436  
142.258  
138.848  
136.000  
129.100  
128.540  
124.065  
123.740

77.339  
77.022  
76.704  
69.606

15.922

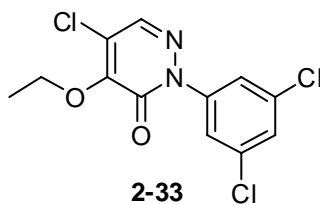

Current Data Parameters  
NAME 102108  
EXPNO 331  
PROCNO 1

F2 - Acquisition Parameters  
Date\_ 20081021  
Time 0.56  
INSTRUM anx400  
PROBHD 5 mm QNP 1H  
PULPROG zgpg30  
TD 65536  
SOLVENT CDCl3  
NS 256  
DS 0  
SWH 27777.777 Hz  
FIDRES 0.423855 Hz  
AQ 1.1796980 sec  
RG 32768  
DW 18.000 usec  
DE 25.71 usec  
TE 300.0 K  
D12 0.0000200 sec  
DL5 23.50 dB  
CPDPRG waltz16  
P31 100.00 usec  
D1 2.0000000 sec  
P1 8.25 usec  
SFO1 100.6248445 MHz  
NUCLEUS 13C  
D11 0.0300000 sec

F2 - Processing parameters  
SI 65536  
SF 100.6127710 MHz  
WDW EM  
SSB 0  
LB 1.00 Hz  
GB 0  
PC 1.40

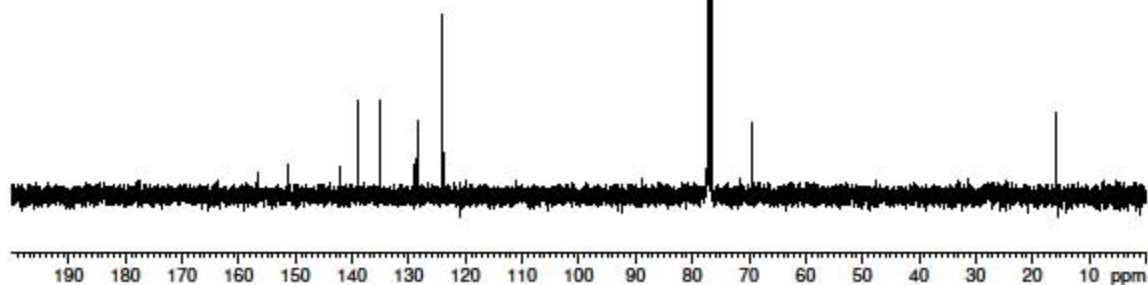

Account no. MEJM16  
3,5-dichloro\_OEt\_A

Current Data Parameters  
NAME 102108  
EXPNO 330  
PROCNO 1

7.849  
7.568  
7.563  
7.394  
7.261

4.681  
4.664

1.446  
1.429  
1.411

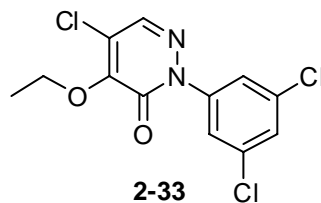

F2 - Acquisition Parameters  
Date\_ 20081021  
Time 0.42  
INSTRUM anx400  
PROBHD 5 mm QNP 1H  
PULPROG zg30  
TD 65536  
SOLVENT CDCl3  
NS 8  
DS 0  
SWH 8064.516 Hz  
FIDRES 0.123055 Hz  
AQ 4.0632820 sec  
RG 2860  
DW 62.000 usec  
DE 88.57 usec  
TE 300.0 K  
D1 2.00000000 sec  
P1 7.50 usec  
SFO1 400.1324008 MHz  
NUCLEUS 1H

F2 - Processing parameters  
SI 65536  
SF 400.1300173 MHz  
WDW EM  
SSB 0  
LB 0.30 Hz  
GB 0  
PC 1.00

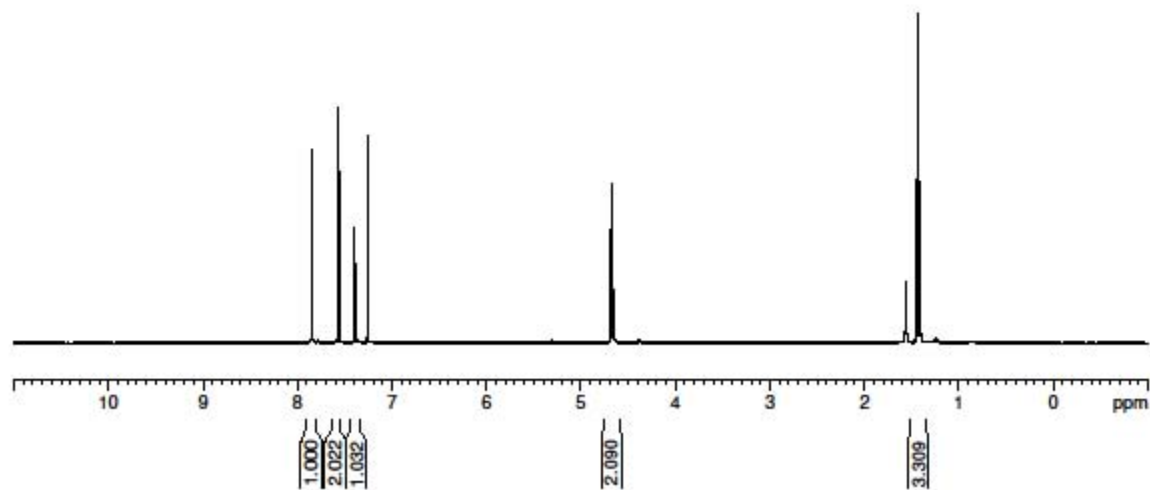

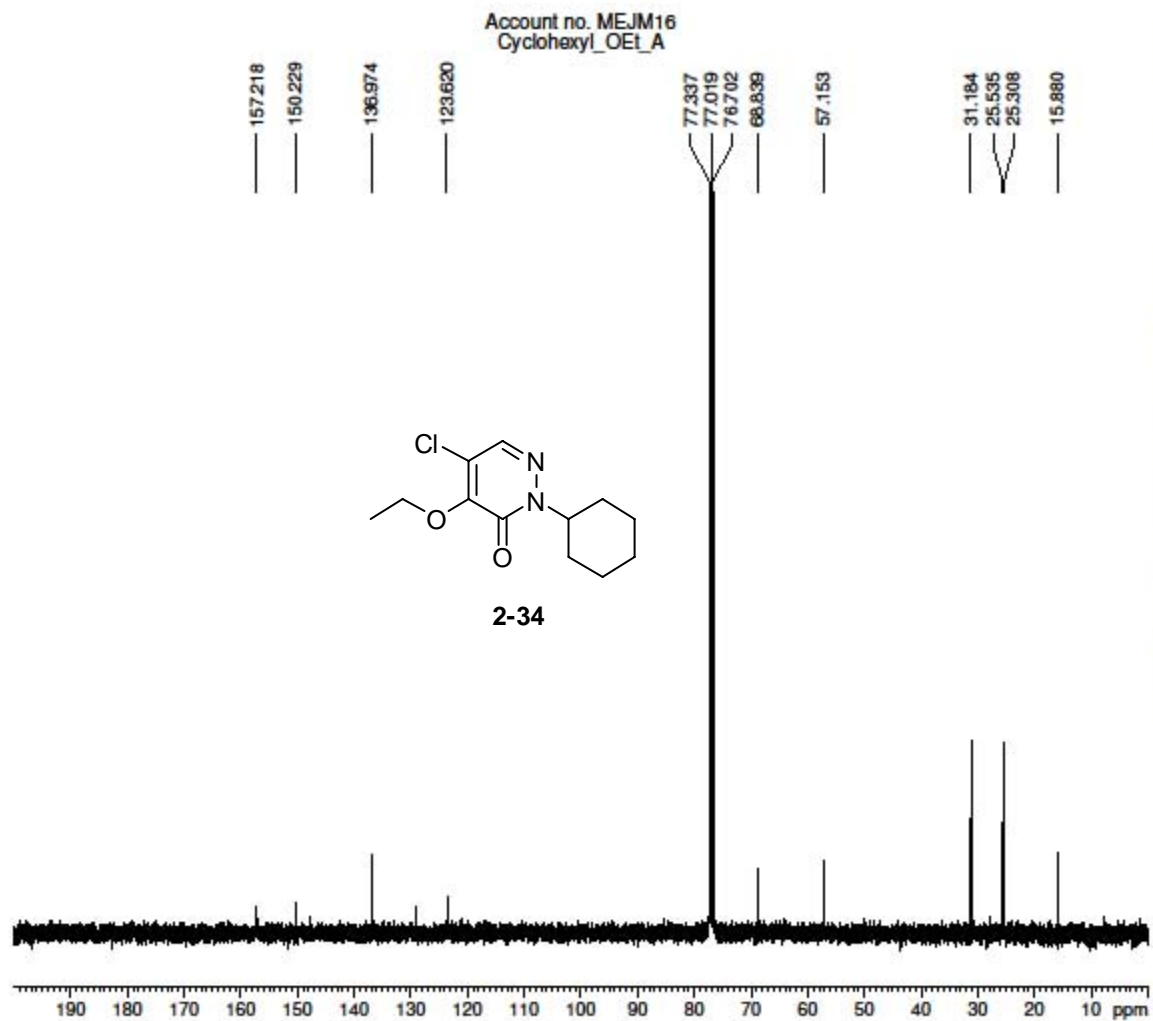

Current Data Parameters  
NAME 102108  
EXPNO 321  
PROCNO 1

F2 - Acquisition Parameters  
Date\_ 20081021  
Time 0.35  
INSTRUM anx400  
PROBHD 5 mm QNP 1H  
PULPROG zgpg30  
TD 65536  
SOLVENT CDCl3  
NS 256  
DS 0  
SWH 27777.777 Hz  
FIDRES 0.423855 Hz  
AQ 1.1796980 sec  
RG 32768  
DW 18.000 usec  
DE 25.71 usec  
TE 300.0 K  
D12 0.0000200 sec  
DL5 23.50 dB  
CPDPRG waltz16  
P31 100.00 usec  
D1 2.0000000 sec  
P1 8.25 usec  
SFO1 100.6248445 MHz  
NUCLEUS 13C  
D11 0.0300000 sec

F2 - Processing parameters  
SI 65536  
SF 100.6127710 MHz  
WDW EM  
SSB 0  
LB 1.00 Hz  
GB 0  
PC 1.40

Account no. MEJM16  
Cyclohexyl\_OEt\_A

Current Data Parameters  
NAME 102108  
EXPNO 320  
PROCNO 1

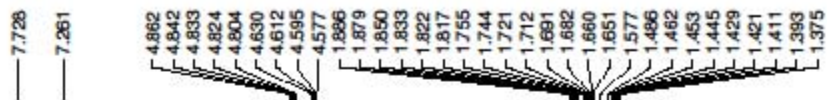

F2 - Acquisition Parameters  
Date\_ 20081021  
Time 0.21  
INSTRUM arx400  
PROBHD 5 mm QNP 1H  
PULPROG zg30  
TD 65536  
SOLVENT CDCl3  
NS 8  
DS 0  
SWH 8064.516 Hz  
FIDRES 0.123055 Hz  
AQ 4.0632820 sec  
RG 2048  
DW 62.000 usec  
DE 88.57 usec  
TE 300.0 K  
D1 2.00000000 sec  
P1 7.50 usec  
SFO1 400.1324008 MHz  
NUCLEUS 1H

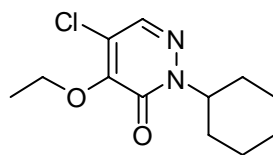

2-34

F2 - Processing parameters  
SI 65536  
SF 400.1300173 MHz  
WDW EM  
SSB 0  
LB 0.30 Hz  
GB 0  
PC 1.00

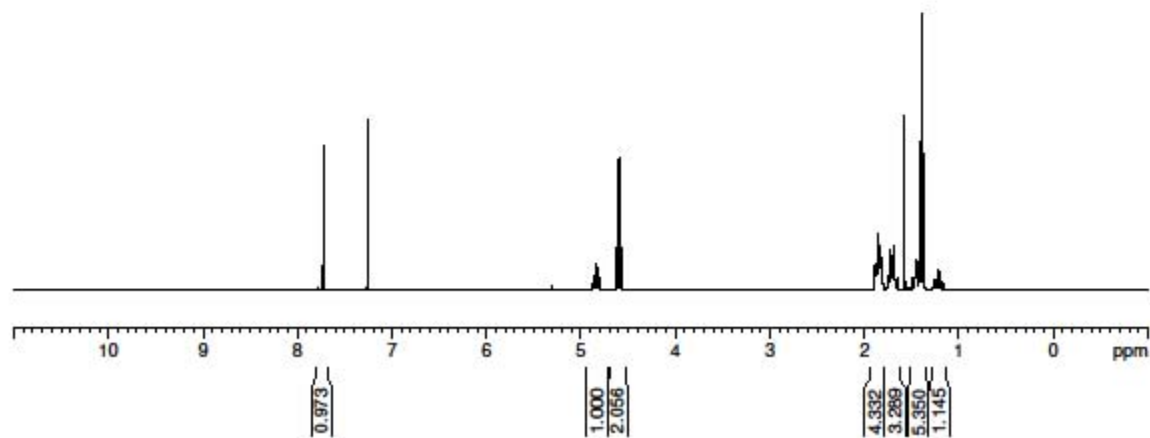

Account no. MEJM16  
Ph\_OEt\_B

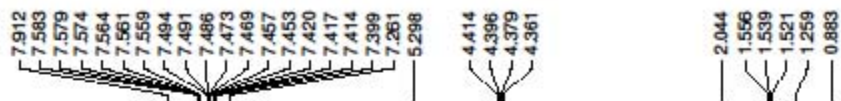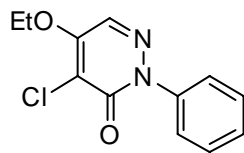

2-35

Current Data Parameters  
NAME 101608  
EXPNO 130  
PROCNO 1

F2 - Acquisition Parameters  
Date\_ 20081016  
Time 13.14  
INSTRUM ax400  
PROBHD 5 mm QNP 1H  
PULPROG zg30  
TD 65536  
SOLVENT CDCl3  
NS 8  
DS 0  
SWH 8064.516 Hz  
FIDRES 0.123055 Hz  
AQ 4.0632820 sec  
RG 2860  
DW 62.000 usec  
DE 88.57 usec  
TE 300.0 K  
D1 2.00000000 sec  
P1 7.50 usec  
SFO1 400.1324008 MHz  
NUCLEUS 1H

F2 - Processing parameters  
SI 65536  
SF 400.1300173 MHz  
WDW EM  
SSB 0  
LB 0.30 Hz  
GB 0  
PC 1.00

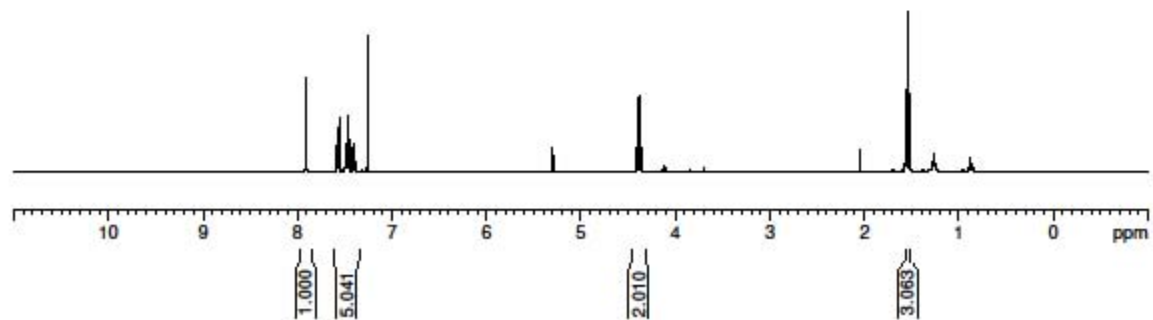

Account no. MEJM16  
4-NO2\_OET\_B

Current Data Parameters  
NAME 102208  
EXPNO 370  
PROCNO 1

8.347  
8.324  
7.980  
7.917  
7.894  
7.261

5.300  
4.435  
4.417

1.575  
1.558  
1.544  
1.540  
0.883

F2 - Acquisition Parameters  
Date\_ 20081022  
Time 18.37  
INSTRUM ax400  
PROBHD 5 mm QNP 1H  
PULPROG zg30  
TD 65536  
SOLVENT CDCl3  
NS 32  
DS 0  
SWH 8064.516 Hz  
FIDRES 0.123055 Hz  
AQ 4.0632820 sec  
RG 11400  
DW 62.000 usec  
DE 88.57 usec  
TE 300.0 K  
D1 2.0000000 sec  
P1 7.50 usec  
SFO1 400.1324008 MHz  
NUCLEUS 1H

F2 - Processing parameters  
SI 65536  
SF 400.1300173 MHz  
WDW EM  
SSB 0  
LB 0.30 Hz  
GB 0  
PC 1.00

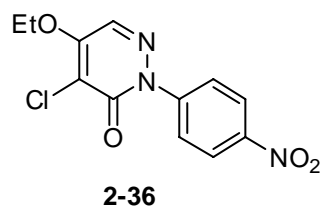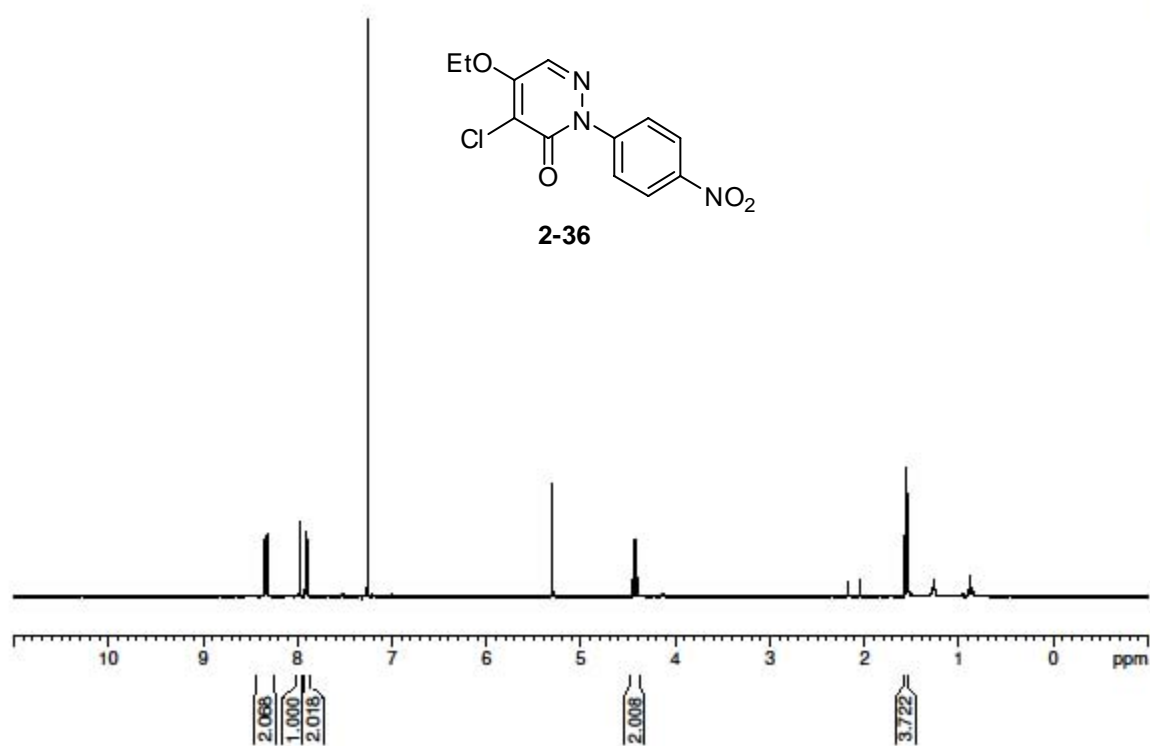

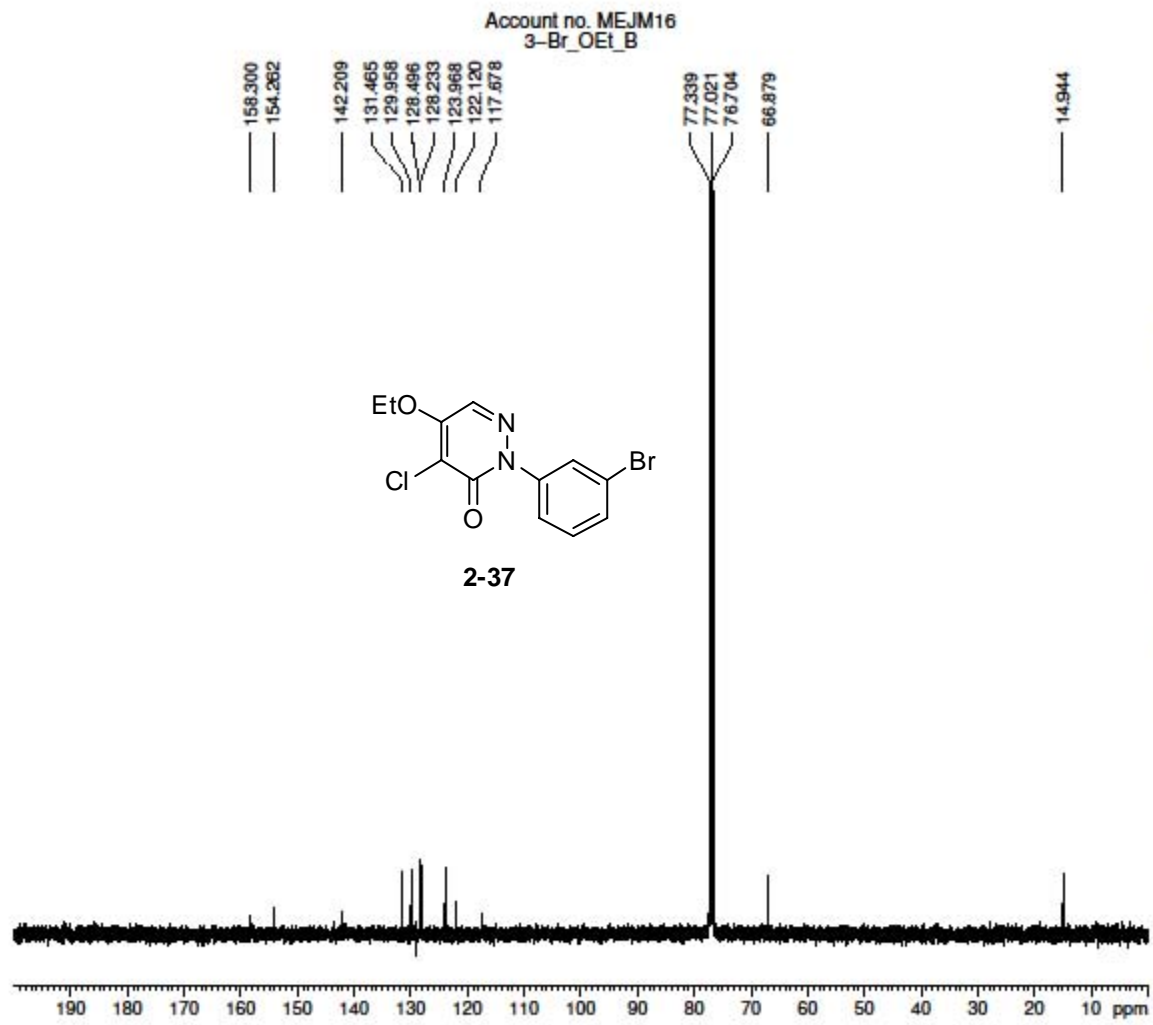

Current Data Parameters  
NAME 102208  
EXPNO 381  
PROCNO 1

F2 - Acquisition Parameters  
Date\_ 20081022  
Time 19.42  
INSTRUM arx400  
PROBHD 5 mm QNP 1H  
PULPROG zgpg30  
TD 65536  
SOLVENT CDCl3  
NS 512  
DS 0  
SWH 27777.777 Hz  
FIDRES 0.423855 Hz  
AQ 1.1796980 sec  
RG 32768  
DW 18.000 usec  
DE 25.71 usec  
TE 300.0 K  
D12 0.0000200 sec  
DL5 23.50 dB  
CPDPRG waltz16  
P31 100.00 usec  
D1 2.0000000 sec  
P1 8.25 usec  
SFO1 100.6248445 MHz  
NUCLEUS 13C  
D11 0.0300000 sec

F2 - Processing parameters  
SI 65536  
SF 100.6127710 MHz  
WDW EM  
SSB 0  
LB 1.00 Hz  
GB 0  
PC 1.40



Account no. MEJM16  
3-Br\_OEt\_B

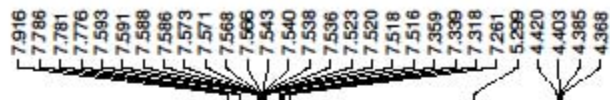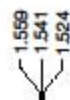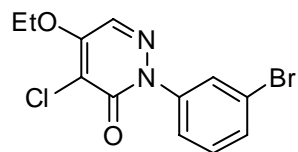

2-37

Current Data Parameters  
NAME 102208  
EXPNO 380  
PROCNO 1

F2 - Acquisition Parameters  
Date\_ 20081022  
Time 19.14  
INSTRUM ax400  
PROBHD 5 mm QNP 1H  
PULPROG zg30  
TD 65536  
SOLVENT CDCl3  
NS 32  
DS 0  
SWH 8064.516 Hz  
FIDRES 0.123055 Hz  
AQ 4.0632820 sec  
RG 4096  
DW 62.000 usec  
DE 88.57 usec  
TE 300.0 K  
D1 2.00000000 sec  
P1 7.50 usec  
SFO1 400.1324008 MHz  
NUCLEUS 1H

F2 - Processing parameters  
SI 65536  
SF 400.1300173 MHz  
WDW EM  
SSB 0  
LB 0.30 Hz  
GB 0  
PC 1.00

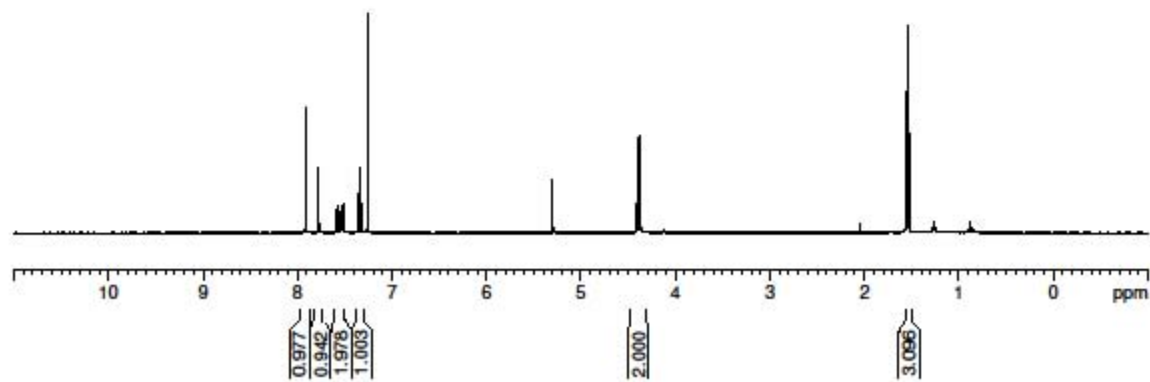

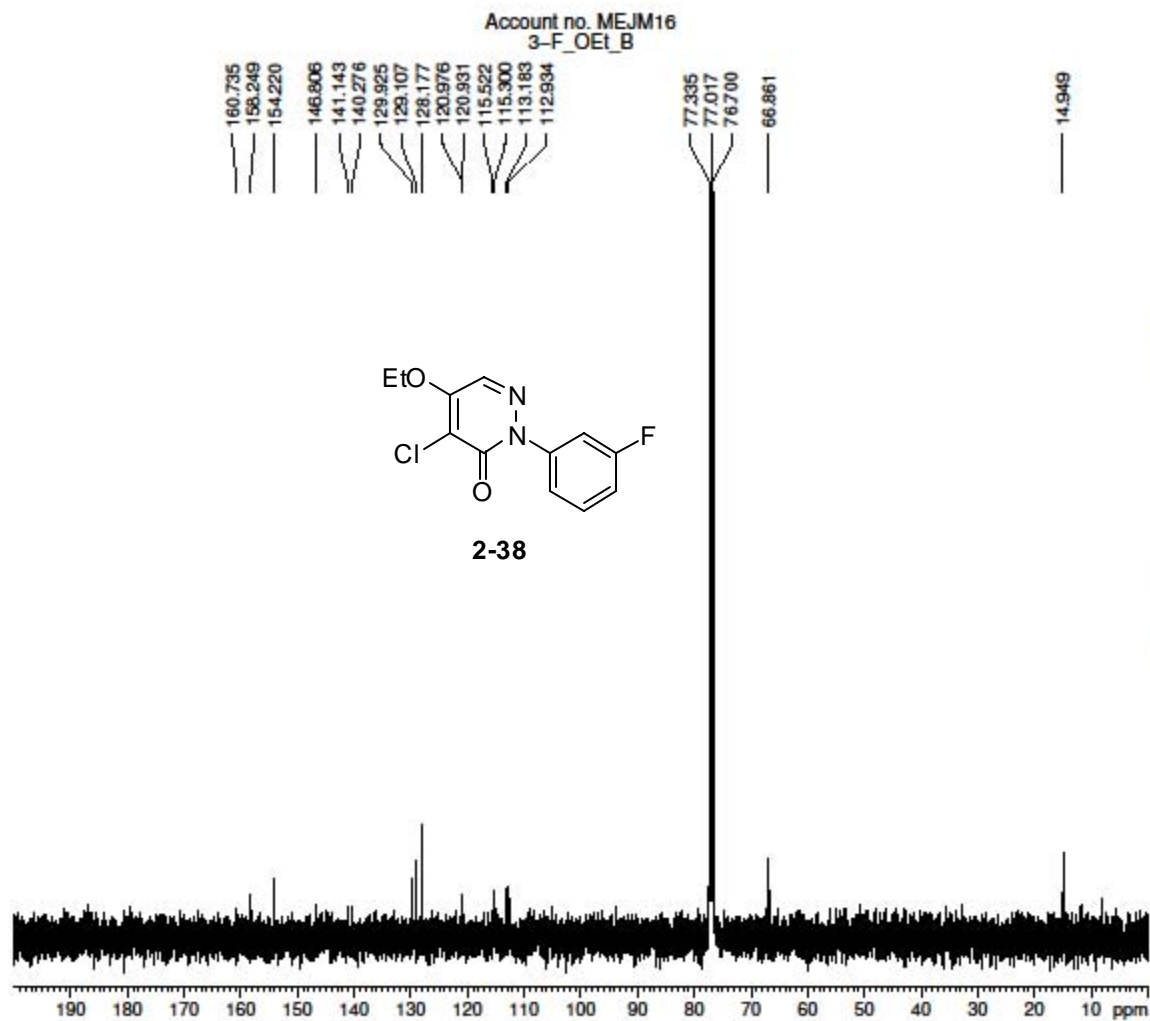

Current Data Parameters  
NAME 102208  
EXPNO 391  
PROCNO 1

F2 - Acquisition Parameters  
Date\_ 20081022  
Time 20.19  
INSTRUM anx400  
PROBHD 5 mm QNP 1H  
PULPROG zgpg30  
TD 65536  
SOLVENT CDCl3  
NS 512  
DS 0  
SWH 27777.777 Hz  
FIDRES 0.423855 Hz  
AQ 1.1796980 sec  
RG 32768  
DW 18.000 usec  
DE 25.71 usec  
TE 300.0 K  
D12 0.0000200 sec  
DL5 23.50 dB  
CPDPRG waltz16  
P31 100.00 usec  
D1 2.0000000 sec  
P1 8.25 usec  
SFO1 100.6248445 MHz  
NUCLEUS 13C  
D11 0.0300000 sec

F2 - Processing parameters  
SI 65536  
SF 100.6127710 MHz  
WDW EM  
SSB 0  
LB 1.00 Hz  
GB 0  
PC 1.40

Account no. MEJM16  
3-F\_OEt\_B

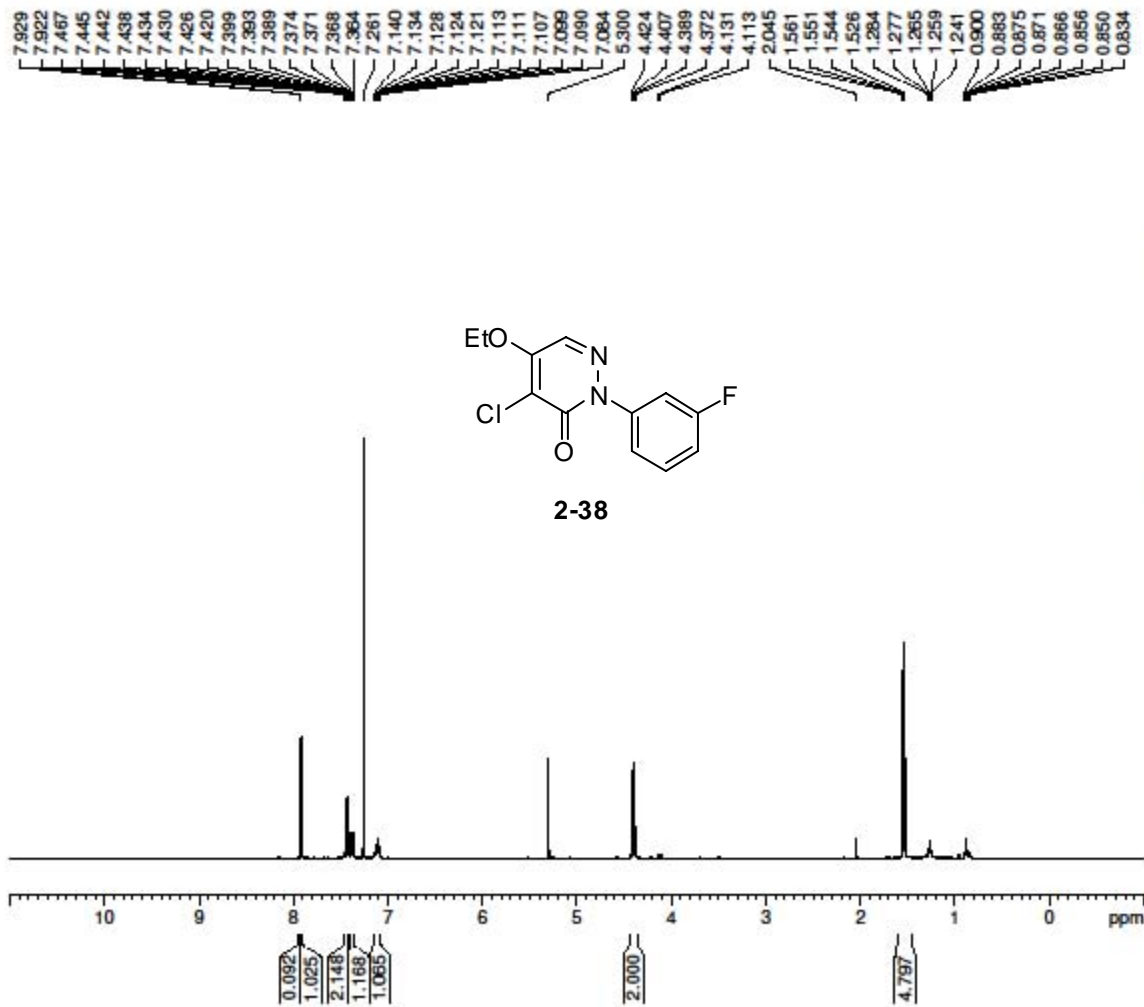

Current Data Parameters  
NAME 102208  
EXPNO 390  
PROCNO 1

F2 - Acquisition Parameters  
Date\_ 20081022  
Time 19.51  
INSTRUM ax400  
PROBHD 5 mm QNP 1H  
PULPROG zg30  
TD 65536  
SOLVENT CDCl3  
NS 32  
DS 0  
SWH 8064.516 Hz  
FIDRES 0.123055 Hz  
AQ 4.0632820 sec  
RG 5700  
DW 62.000 usec  
DE 88.57 usec  
TE 300.0 K  
D1 2.00000000 sec  
P1 7.50 usec  
SFO1 400.1324008 MHz  
NUCLEUS 1H

F2 - Processing parameters  
SI 65536  
SF 400.1300173 MHz  
WDW EM  
SSB 0  
LB 0.30 Hz  
GB 0  
PC 1.00

Account no. MEJM16  
3Tolyl\_OEt\_B

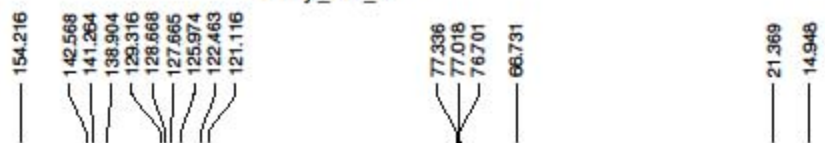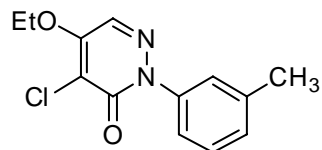

2-39

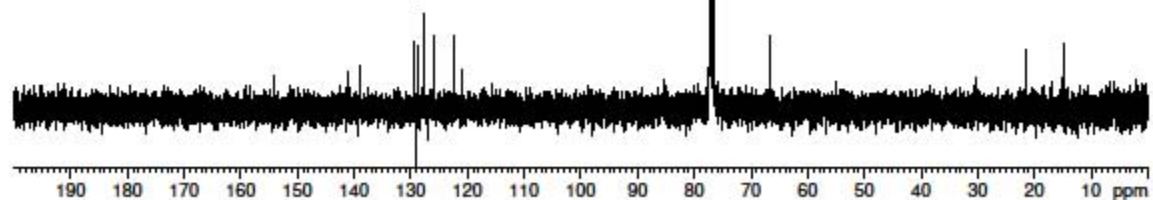

Current Data Parameters  
NAME 102208  
EXPNO 401  
PROCNO 1

F2 - Acquisition Parameters  
Date\_ 20081022  
Time 20.55  
INSTRUM arx400  
PROBHD 5 mm QNP 1H  
PULPROG zgpg30  
TD 65536  
SOLVENT CDCl3  
NS 512  
DS 0  
SWH 27777.777 Hz  
FIDRES 0.423855 Hz  
AQ 1.1796980 sec  
RG 32768  
DW 18.000 usec  
DE 25.71 usec  
TE 300.0 K  
D12 0.0000200 sec  
DL5 23.50 dB  
CPDPRG waltz16  
P31 100.00 usec  
D1 2.0000000 sec  
P1 8.25 usec  
SFO1 100.6248445 MHz  
NUCLEUS 13C  
D11 0.0300000 sec

F2 - Processing parameters  
SI 65536  
SF 100.6127710 MHz  
WDW EM  
SSB 0  
LB 1.00 Hz  
GB 0  
PC 1.40

Account no. MEJM16  
3Tolyl\_OEL\_B

Current Data Parameters  
NAME 102208  
EXPNO 400  
PROCNO 1

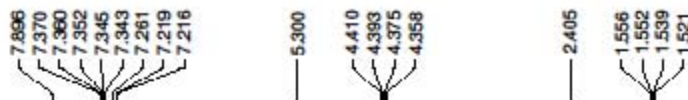

F2 - Acquisition Parameters  
Date\_ 20081022  
Time 20.27  
INSTRUM ax400  
PROBHD 5 mm QNP 1H  
PULPROG zg30  
TD 65536  
SOLVENT CDCl3  
NS 16  
DS 0  
SWH 8064.516 Hz  
FIDRES 0.123055 Hz  
AQ 4.0632820 sec  
RG 5700  
DW 62.000 usec  
DE 88.57 usec  
TE 300.0 K  
D1 2.00000000 sec  
P1 7.50 usec  
SFO1 400.1324008 MHz  
NUCLEUS 1H

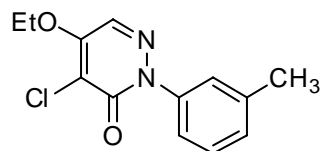

2-39

F2 - Processing parameters  
SI 65536  
SF 400.1300173 MHz  
WDW EM  
SSB 0  
LB 0.30 Hz  
GB 0  
PC 1.00

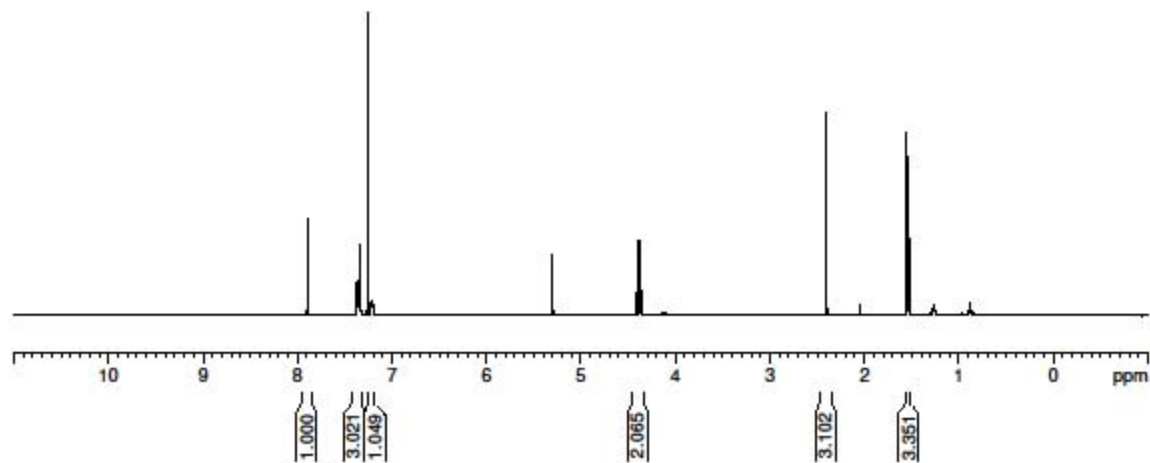

Account no. MEJM16  
3,5-DiCl\_OEL\_B\_re

7.923  
7.605  
7.601  
7.391  
7.387  
7.382  
7.260

5.299  
4.428  
4.411  
4.393  
4.376

1.562  
1.544  
1.527

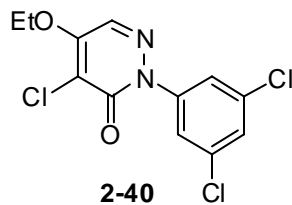

Current Data Parameters  
NAME 102308  
EXPNO 21  
PROCNO 1

F2 - Acquisition Parameters  
Date\_ 20081023  
Time 10.02  
INSTRUM ax400  
PROBHD 5 mm QNP 1H  
PULPROG zg30  
TD 65536  
SOLVENT CDCl3  
NS 8  
DS 0  
SWH 8064.516 Hz  
FIDRES 0.123055 Hz  
AQ 4.0632820 sec  
RG 5700  
DW 62.000 usec  
DE 88.57 usec  
TE 300.0 K  
D1 2.00000000 sec  
P1 7.50 usec  
SFO1 400.1324008 MHz  
NUCLEUS 1H

F2 - Processing parameters  
SI 65536  
SF 400.1300173 MHz  
WDW EM  
SSB 0  
LB 0.30 Hz  
GB 0  
PC 1.00

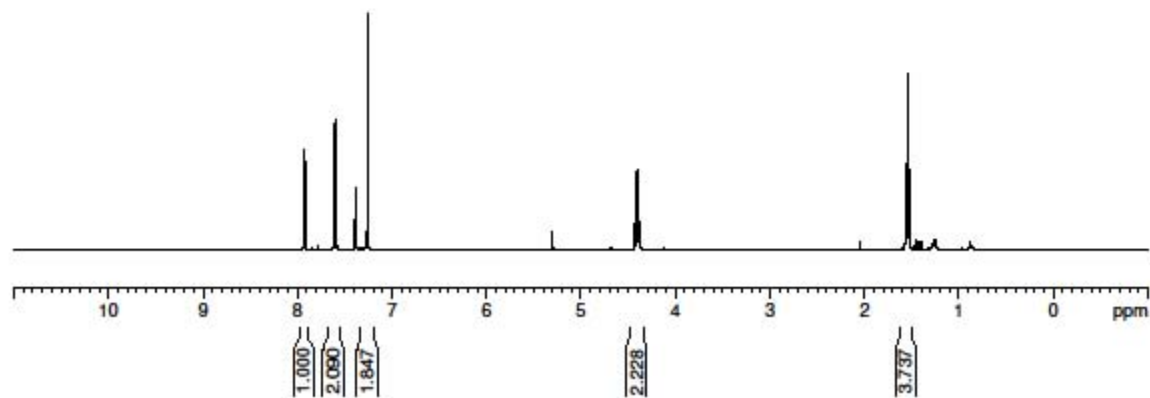

Account no. MEJM16  
Cyclohexyl\_OMe\_1

158.401  
154.284

125.592  
116.309

77.354  
77.087  
76.719

57.907  
57.469

31.286  
25.478  
25.326

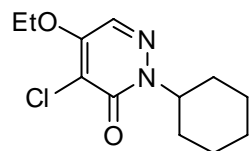

2-41

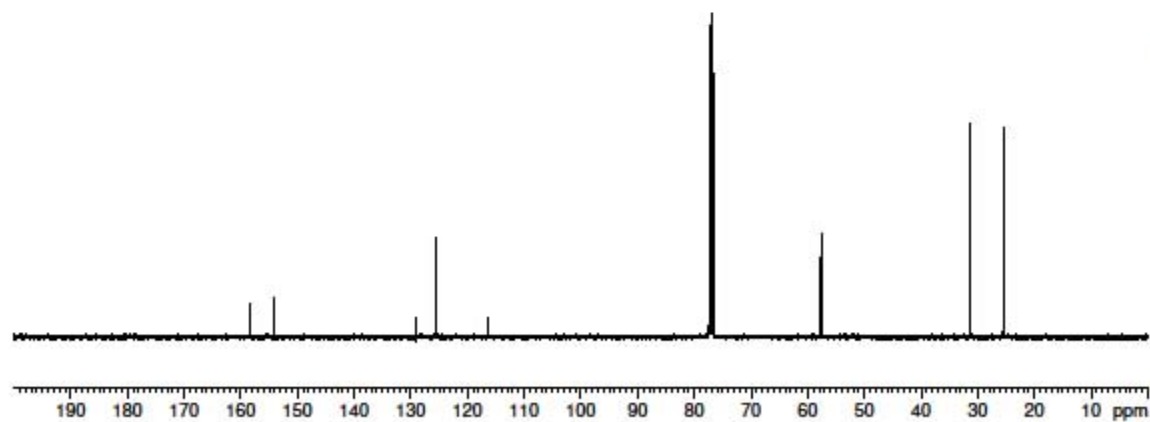

Current Data Parameters  
NAME 091808  
EXPNO 531  
PROCNO 1

F2 - Acquisition Parameters  
Date\_ 20080919  
Time 2.15  
INSTRUM arx400  
PROBHD 5 mm QNP 1H  
PULPROG zgpg30  
TD 65536  
SOLVENT CDCl3  
NS 1024  
DS 0  
SWH 27777.777 Hz  
FIDRES 0.423855 Hz  
AQ 1.1796980 sec  
RG 32768  
DW 18.000 usec  
DE 25.71 usec  
TE 300.0 K  
D12 0.0000200 sec  
DL5 23.50 dB  
CPDPRG waltz16  
P31 100.00 usec  
D1 2.0000000 sec  
P1 8.25 usec  
SFO1 100.6248445 MHz  
NUCLEUS 13C  
D11 0.0300000 sec

F2 - Processing parameters  
SI 65536  
SF 100.6127710 MHz  
WDW EM  
SSB 0  
LB 1.00 Hz  
GB 0  
PC 1.40

Account no. MEJM16  
Cyclohexyl\_OMe\_1

Current Data Parameters  
NAME 091808  
EXPNO 530  
PROCNO 1

F2 - Acquisition Parameters  
Date\_ 20080919  
Time 1.38  
INSTRUM arx400  
PROBHD 5 mm QNP 1H  
PULPROG zg30  
TD 65536  
SOLVENT CDCl3  
NS 8  
DS 0  
SWH 8064.516 Hz  
FIDRES 0.123055 Hz  
AQ 4.0632820 sec  
RG 1024  
DW 62.000 usec  
DE 88.57 usec  
TE 300.0 K  
D1 2.00000000 sec  
P1 7.50 usec  
SFO1 400.1324008 MHz  
NUCLEUS 1H

F2 - Processing parameters  
SI 65536  
SF 400.1300173 MHz  
WDW EM  
SSB 0  
LB 0.30 Hz  
GB 0  
PC 1.00

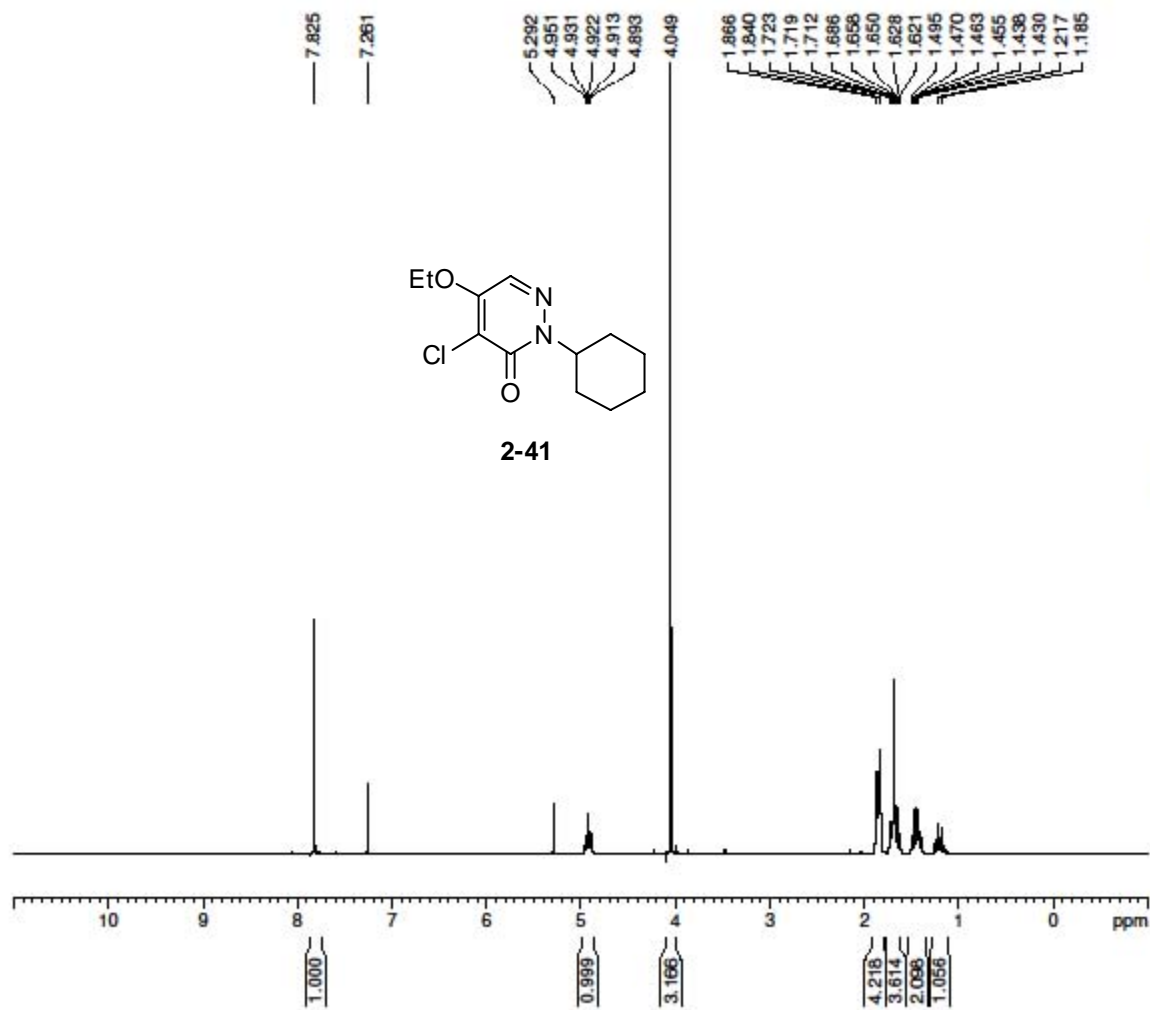



Account no. MEJM16  
Ph\_OEt\_SH\_Woogie\_re

155.755  
148.544  
141.164  
137.017  
128.796  
128.301  
125.506  
125.467

77.390  
77.072  
76.754  
68.727

16.116

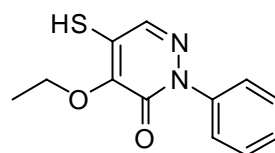

2-10

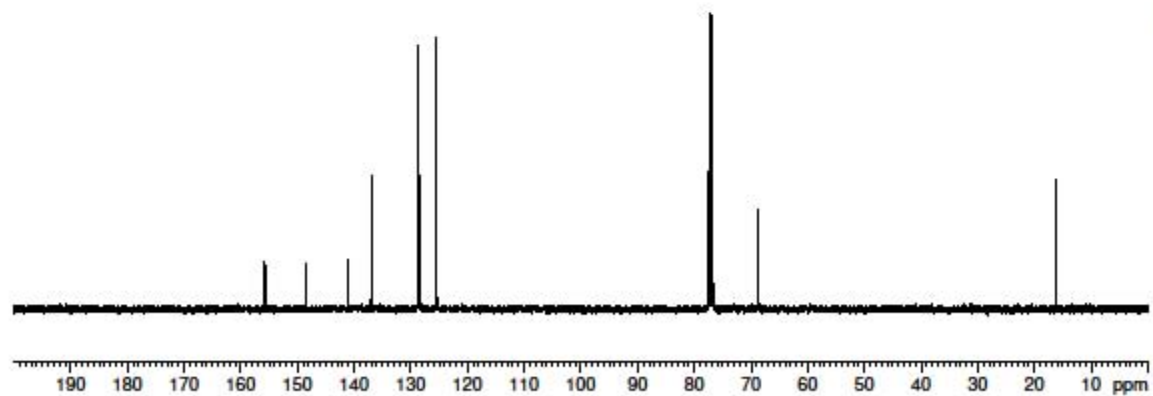

Current Data Parameters  
NAME 101608  
EXPNO 621  
PROCNO 1

F2 - Acquisition Parameters  
Date\_ 20081017  
Time 0.42  
INSTRUM arx400  
PROBHD 5 mm QNP 1H  
PULPROG zgpg30  
TD 65536  
SOLVENT CDCl3  
NS 256  
DS 0  
SWH 27777.777 Hz  
FIDRES 0.423855 Hz  
AQ 1.1796980 sec  
RG 32768  
DW 18.000 usec  
DE 25.71 usec  
TE 300.0 K  
D12 0.0000200 sec  
DL5 23.50 dB  
CPDPRG waltz16  
P31 100.00 usec  
D1 2.0000000 sec  
P1 8.25 usec  
SFO1 100.6248445 MHz  
NUCLEUS 13C  
D11 0.0300000 sec

F2 - Processing parameters  
SI 65536  
SF 100.6127710 MHz  
WDW EM  
SSB 0  
LB 1.00 Hz  
GB 0  
PC 1.40

Account no. MEJM16  
Ph\_OEt\_SH\_Woogie\_re

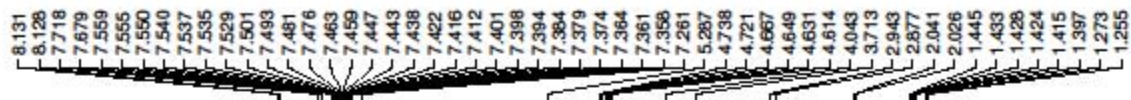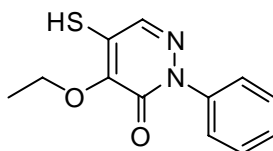

2-10

Current Data Parameters  
NAME 101608  
EXPNO 620  
PROCNO 1

F2 - Acquisition Parameters  
Date\_ 20081017  
Time 0.28  
INSTRUM arx400  
PROBHD 5 mm QNP 1H  
PULPROG zg30  
TD 65536  
SOLVENT CDCl3  
NS 8  
DS 0  
SWH 8064.516 Hz  
FIDRES 0.123055 Hz  
AQ 4.0632820 sec  
RG 512  
DW 62.000 usec  
DE 88.57 usec  
TE 300.0 K  
D1 2.00000000 sec  
P1 7.50 usec  
SFO1 400.1324008 MHz  
NUCLEUS 1H

F2 - Processing parameters  
SI 65536  
SF 400.1300173 MHz  
WDW EM  
SSB 0  
LB 0.30 Hz  
GB 0  
PC 1.00

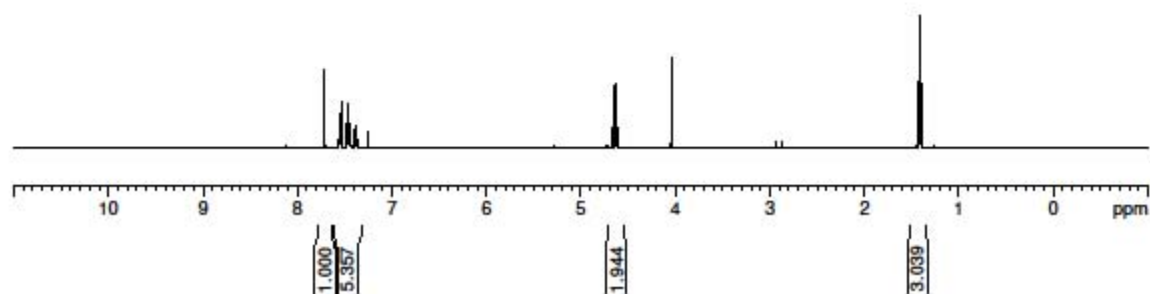

default proton parameters

8.329  
8.325  
8.315  
8.311  
7.893  
7.888  
7.878  
7.874  
7.775  
7.260

4.665  
4.651  
4.636  
4.622  
4.103

1.450  
1.440  
1.436  
1.430  
1.426  
1.414  
1.251  
0.068

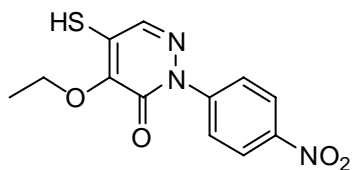

2-11

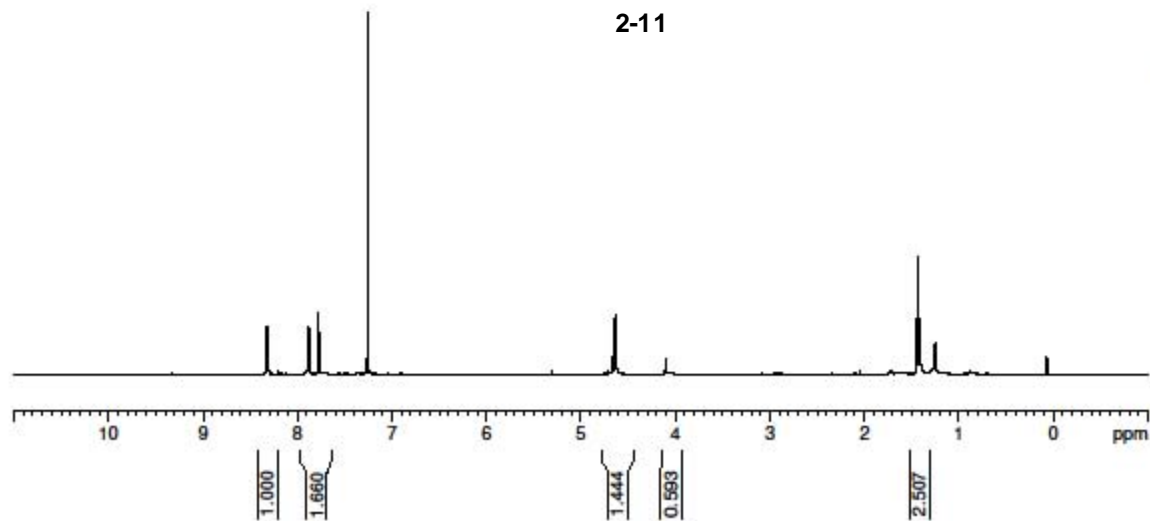

Current Data Parameters  
NAME 4NO2\_OEt\_SH\_A\_re  
EXPNO 1  
PROCNO 1

F2 - Acquisition Parameters  
Date\_ 20081024  
Time 8.06  
INSTRUM avance500  
PROBHD 5 mm bb-Z 2800  
PULPROG zg30  
TD 32768  
SOLVENT CDCl3  
NS 64  
DS 0  
SWH 10000.000 Hz  
FIDRES 0.305176 Hz  
AQ 1.6385000 sec  
RG 322.5  
DW 50.000 usec  
DE 6.00 usec  
TE 295.6 K  
D1 2.00000000 sec  
MCREST 0.00000000 sec  
MCWRK 0.01500000 sec

CHANNEL f1  
NUC1 1H  
P1 12.00 usec  
PL1 0.00 dB  
SFO1 500.3330020 MHz

F2 - Processing parameters  
SI 32768  
SF 500.3300220 MHz  
WDW EM  
SSB 0  
LB 0.30 Hz  
GB 0  
PC 1.00

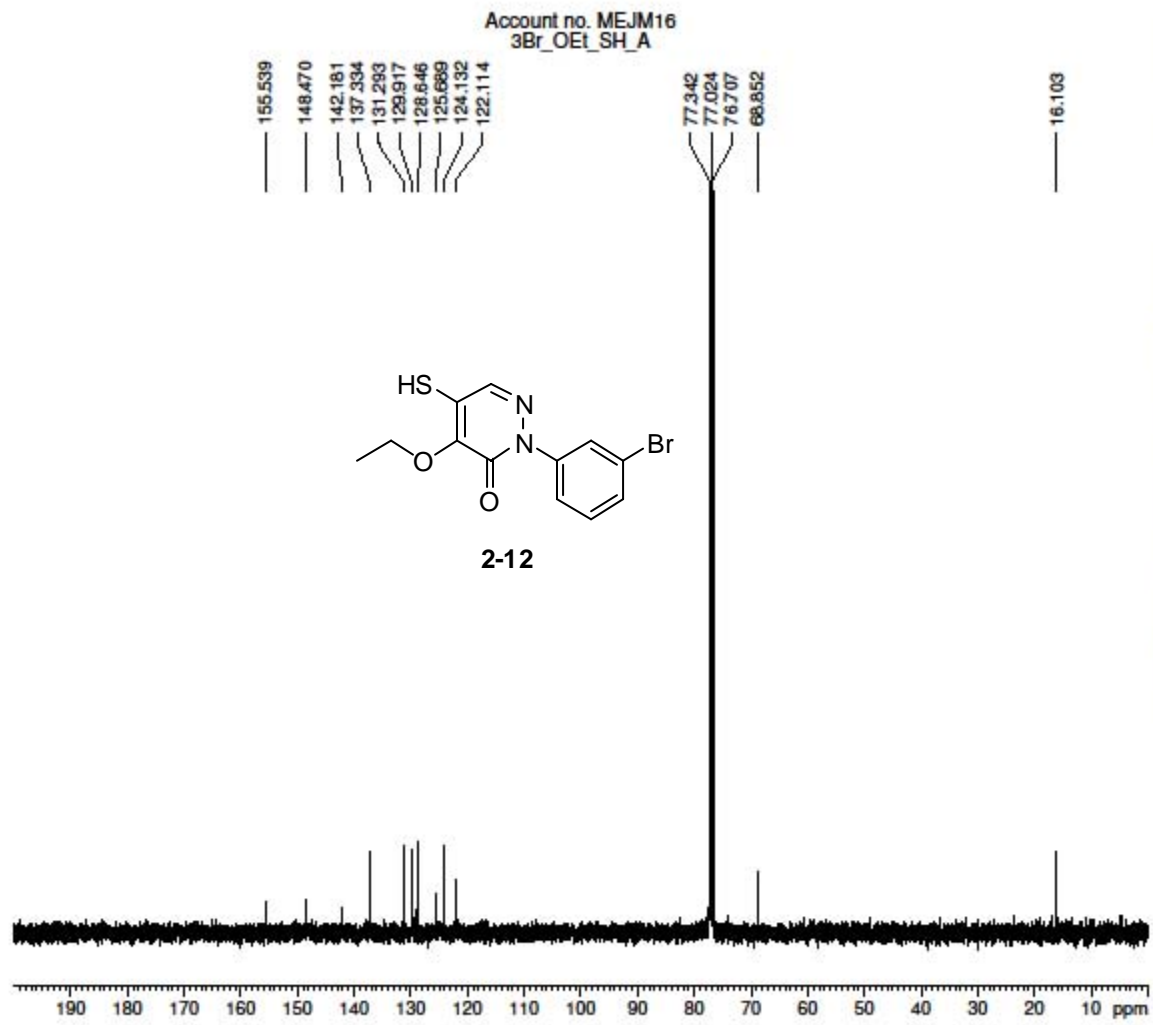

Current Data Parameters  
NAME 102408  
EXPNO 70  
PROCNO 1

F2 - Acquisition Parameters  
Date\_ 20081024  
Time 10.16  
INSTRUM arx400  
PROBHD 5 mm QNP 1H  
PULPROG zgpg30  
TD 65536  
SOLVENT CDCl3  
NS 256  
DS 0  
SWH 27777.777 Hz  
FIDRES 0.423855 Hz  
AQ 1.1796980 sec  
RG 32768  
DW 18.000 usec  
DE 25.71 usec  
TE 300.0 K  
D12 0.0000200 sec  
DL5 23.50 dB  
CPDPRG waltz16  
P31 100.00 usec  
D1 2.0000000 sec  
P1 8.25 usec  
SFO1 100.6248445 MHz  
NUCLEUS 13C  
D11 0.0300000 sec

F2 - Processing parameters  
SI 65536  
SF 100.6127710 MHz  
WDW EM  
SSB 0  
LB 1.00 Hz  
GB 0  
PC 1.40

Account no. MEJM16  
3Br\_OEt\_SH\_A

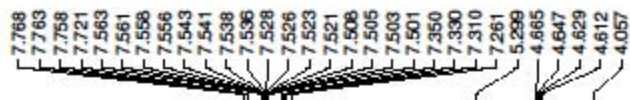

Current Data Parameters  
NAME 102308  
EXPNO 270  
PROCNO 1

F2 - Acquisition Parameters  
Date\_ 20081023  
Time 18.34  
INSTRUM ax400  
PROBHD 5 mm QNP 1H  
PULPROG zg30  
TD 65536  
SOLVENT CDCl3  
NS 32  
DS 0  
SWH 8064.516 Hz  
FIDRES 0.123055 Hz  
AQ 4.0632820 sec  
RG 2048  
DW 62.000 usec  
DE 88.57 usec  
TE 300.0 K  
D1 2.00000000 sec  
P1 7.50 usec  
SFO1 400.1324008 MHz  
NUCLEUS 1H

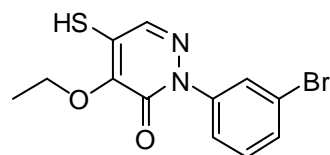

2-12

F2 - Processing parameters  
SI 65536  
SF 400.1300173 MHz  
WDW EM  
SSB 0  
LB 0.30 Hz  
GB 0  
PC 1.00

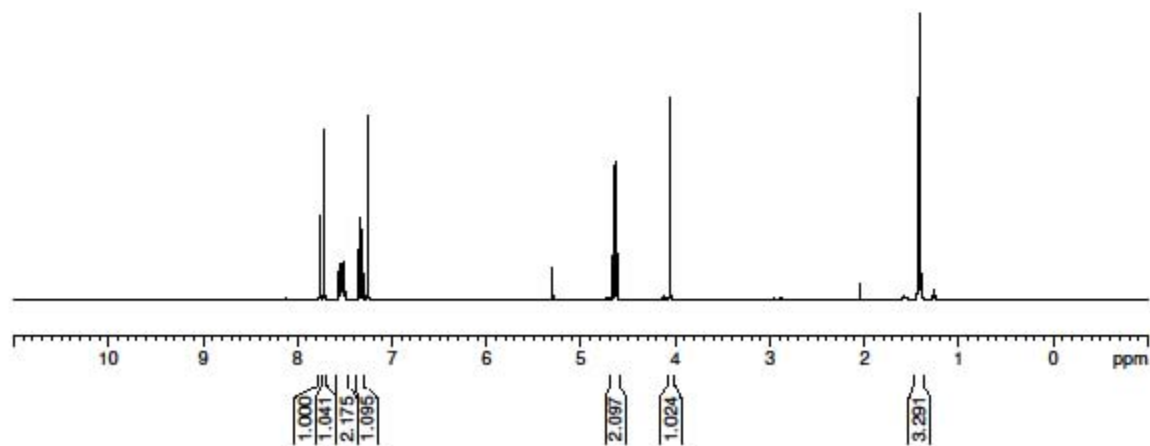

Account no. MEJM16  
3F\_OEL\_SH\_A

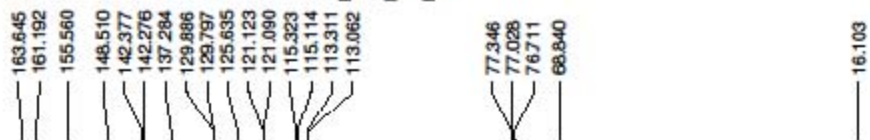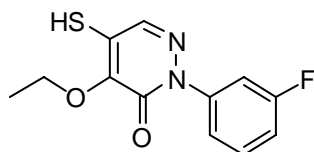

2-13

Current Data Parameters  
NAME 102308  
EXPNO 290  
PROCNO 1

F2 - Acquisition Parameters  
Date\_ 20081023  
Time 19.16  
INSTRUM arx400  
PROBHD 5 mm QNP 1H  
PULPROG zgpg30  
TD 65536  
SOLVENT CDCl3  
NS 512  
DS 0  
SWH 27777.777 Hz  
FIDRES 0.423855 Hz  
AQ 1.1796980 sec  
RG 32768  
DW 18.000 usec  
DE 25.71 usec  
TE 300.0 K  
D12 0.0000200 sec  
DL5 23.50 dB  
CPDPRG waltz16  
P31 100.00 usec  
D1 2.0000000 sec  
P1 8.25 usec  
SFO1 100.6248445 MHz  
NUCLEUS 13C  
D11 0.0300000 sec

F2 - Processing parameters  
SI 65536  
SF 100.6127710 MHz  
WDW EM  
SSB 0  
LB 1.00 Hz  
GB 0  
PC 1.40

190 180 170 160 150 140 130 120 110 100 90 80 70 60 50 40 30 20 10 ppm

Account no. MEJM16  
3F\_OEL\_SH\_A

7.724  
7.415  
7.410  
7.406  
7.403  
7.261

4.666  
4.648  
4.631  
4.613  
4.057

1.440  
1.422  
1.405

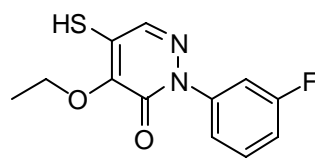

2-13

Current Data Parameters  
NAME 102308  
EXPNO 240  
PROCNO 1

F2 - Acquisition Parameters  
Date\_ 20081023  
Time 17.39  
INSTRUM ax400  
PROBHD 5 mm QNP 1H  
PULPROG zg30  
TD 65536  
SOLVENT CDCl3  
NS 32  
DS 0  
SWH 8064.516 Hz  
FIDRES 0.123055 Hz  
AQ 4.0632820 sec  
RG 2048  
DW 62.000 usec  
DE 88.57 usec  
TE 300.0 K  
D1 2.00000000 sec  
P1 7.50 usec  
SFO1 400.1324008 MHz  
NUCLEUS 1H

F2 - Processing parameters  
SI 65536  
SF 400.1300173 MHz  
WDW EM  
SSB 0  
LB 0.30 Hz  
GB 0  
PC 1.00

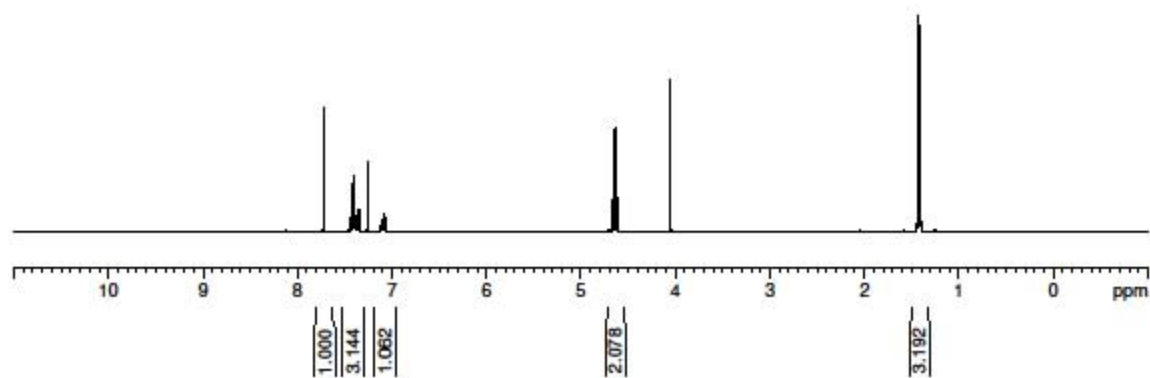

Account no. MEJM16  
3Tolyl\_OEt\_SH\_A

155.779  
148.532  
141.081  
138.882  
136.877  
129.164  
128.655  
126.090  
125.349  
122.630

77.353  
77.035  
76.718  
68.713

21.381  
16.111

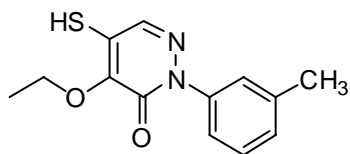

2-14

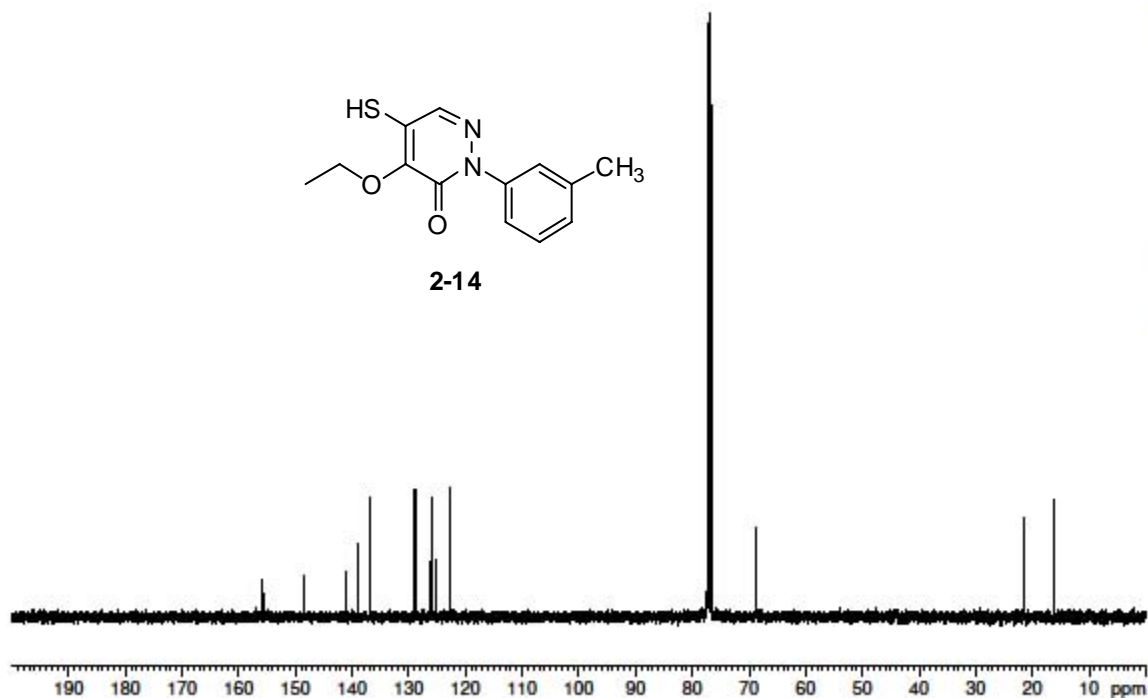

Current Data Parameters  
NAME 102308  
EXPNO 381  
PROCNO 1

F2 - Acquisition Parameters  
Date\_ 20081023  
Time 21.49  
INSTRUM ax400  
PROBHD 5 mm QNP 1H  
PULPROG zgpg30  
TD 65536  
SOLVENT CDCl3  
NS 512  
DS 0  
SWH 27777.777 Hz  
FIDRES 0.423855 Hz  
AQ 1.1796980 sec  
RG 32768  
DW 18.000 usec  
DE 25.71 usec  
TE 300.0 K  
D12 0.0000200 sec  
DL5 23.50 dB  
CPDPRG waltz16  
P31 100.00 usec  
D1 2.0000000 sec  
P1 8.25 usec  
SFO1 100.6248445 MHz  
NUCLEUS 13C  
D11 0.0300000 sec

F2 - Processing parameters  
SI 65536  
SF 100.6127710 MHz  
WDW EM  
SSB 0  
LB 1.00 Hz  
GB 0  
PC 1.40



Account no. MEJM16  
3Tolyl\_OEt\_SH\_A

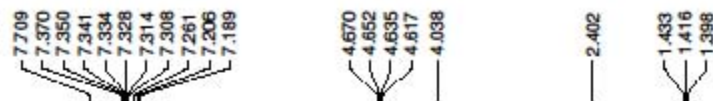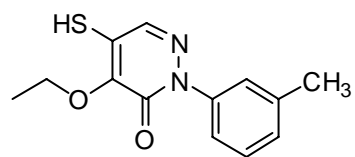

2-14

Current Data Parameters  
NAME 102308  
EXPNO 380  
PROCNO 1

F2 - Acquisition Parameters  
Date\_ 20081023  
Time 21.21  
INSTRUM arx400  
PROBHD 5 mm QNP 1H  
PULPROG zg30  
TD 65536  
SOLVENT CDCl3  
NS 32  
DS 0  
SWH 8064.516 Hz  
FIDRES 0.123055 Hz  
AQ 4.0632820 sec  
RG 1024  
DW 62.000 usec  
DE 88.57 usec  
TE 300.0 K  
D1 2.00000000 sec  
P1 7.50 usec  
SFO1 400.1324008 MHz  
NUCLEUS 1H

F2 - Processing parameters  
SI 65536  
SF 400.1300173 MHz  
WDSW EM  
SSB 0  
LB 0.30 Hz  
GB 0  
PC 1.00

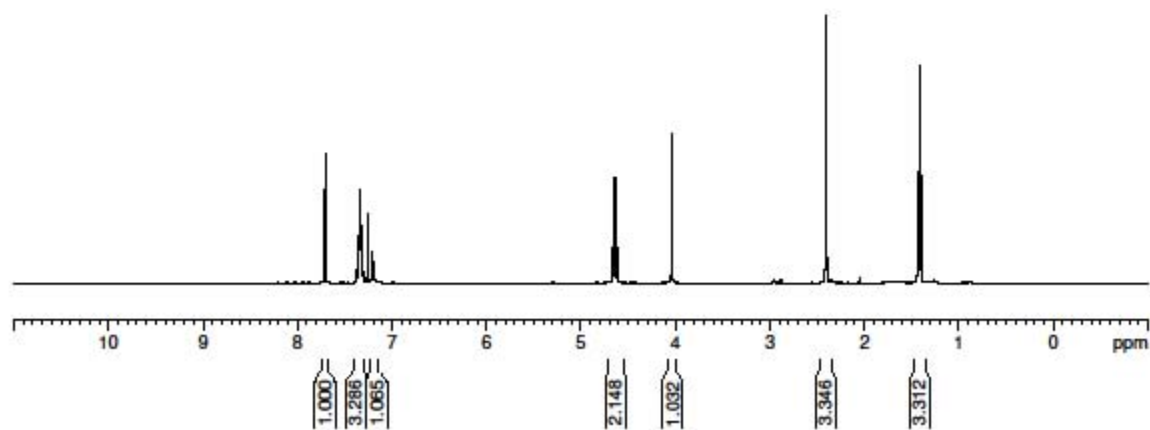

Account no. MEJM16  
3,5-Dichloro\_OEt\_SH\_A

155.375  
148.414  
142.509  
137.634  
134.876  
128.231  
125.896  
124.075

77.337  
77.020  
76.702  
68.960

16.092

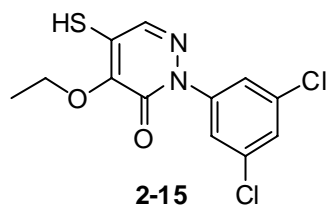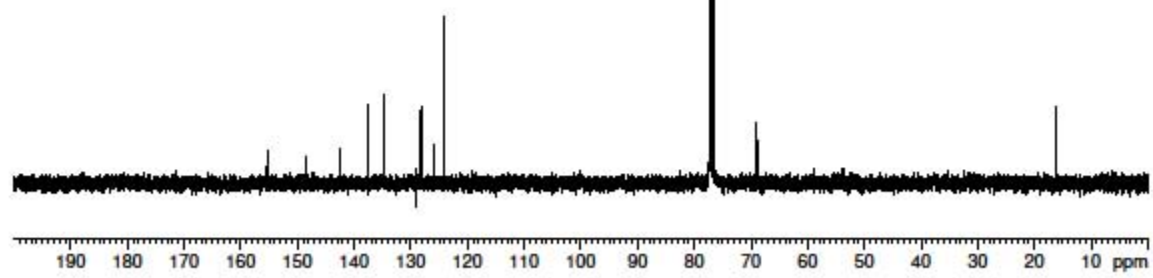

Current Data Parameters  
NAME 102308  
EXPNO 401  
PROCNO 1

F2 - Acquisition Parameters  
Date\_ 20081023  
Time 23.08  
INSTRUM ax400  
PROBHD 5 mm QNP 1H  
PULPROG zgpg30  
TD 65536  
SOLVENT CDCl3  
NS 512  
DS 0  
SWH 27777.777 Hz  
FIDRES 0.423855 Hz  
AQ 1.1796980 sec  
RG 32768  
DW 18.000 usec  
DE 25.71 usec  
TE 300.0 K  
D12 0.0000200 sec  
DL5 23.50 dB  
CPDPRG waltz16  
P31 100.00 usec  
D1 2.0000000 sec  
P1 8.25 usec  
SFO1 100.6248445 MHz  
NUCLEUS 13C  
D11 0.0300000 sec

F2 - Processing parameters  
SI 65536  
SF 100.6127710 MHz  
WDW EM  
SSB 0  
LB 1.00 Hz  
GB 0  
PC 1.40

Account no. MEJM16  
3,5-Dichloro\_OEt\_SH\_A

7.724  
7.582  
7.577  
7.376  
7.371  
7.366  
7.261

4.662  
4.644  
4.627  
4.609  
4.071

1.442  
1.424  
1.407

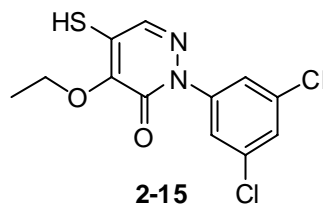

Current Data Parameters  
NAME 102308  
EXPNO 400  
PROCNO 1

F2 - Acquisition Parameters  
Date\_ 20081023  
Time 22.40  
INSTRUM ax400  
PROBHD 5 mm QNP 1H  
PULPROG zg30  
TD 65536  
SOLVENT CDCl3  
NS 32  
DS 0  
SWH 8064.516 Hz  
FIDRES 0.123055 Hz  
AQ 4.0632820 sec  
RG 4096  
DW 62.000 usec  
DE 88.57 usec  
TE 300.0 K  
D1 2.00000000 sec  
P1 7.50 usec  
SFO1 400.1324008 MHz  
NUCLEUS 1H

F2 - Processing parameters  
SI 65536  
SF 400.1300173 MHz  
WDW EM  
SSB 0  
LB 0.30 Hz  
GB 0  
PC 1.00

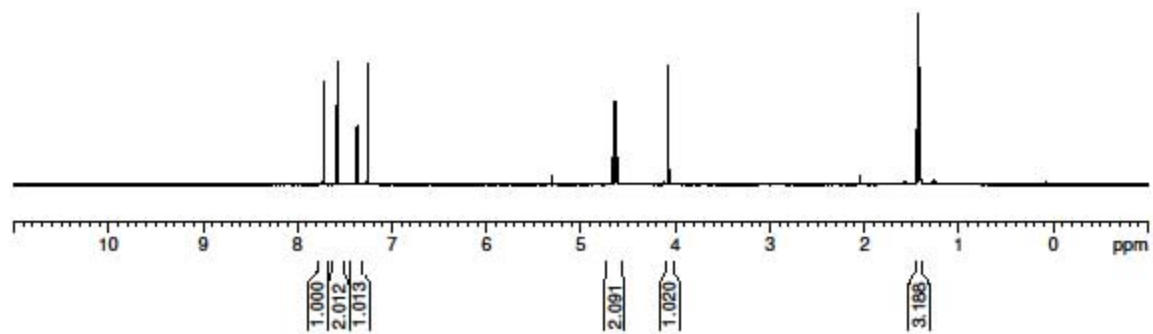

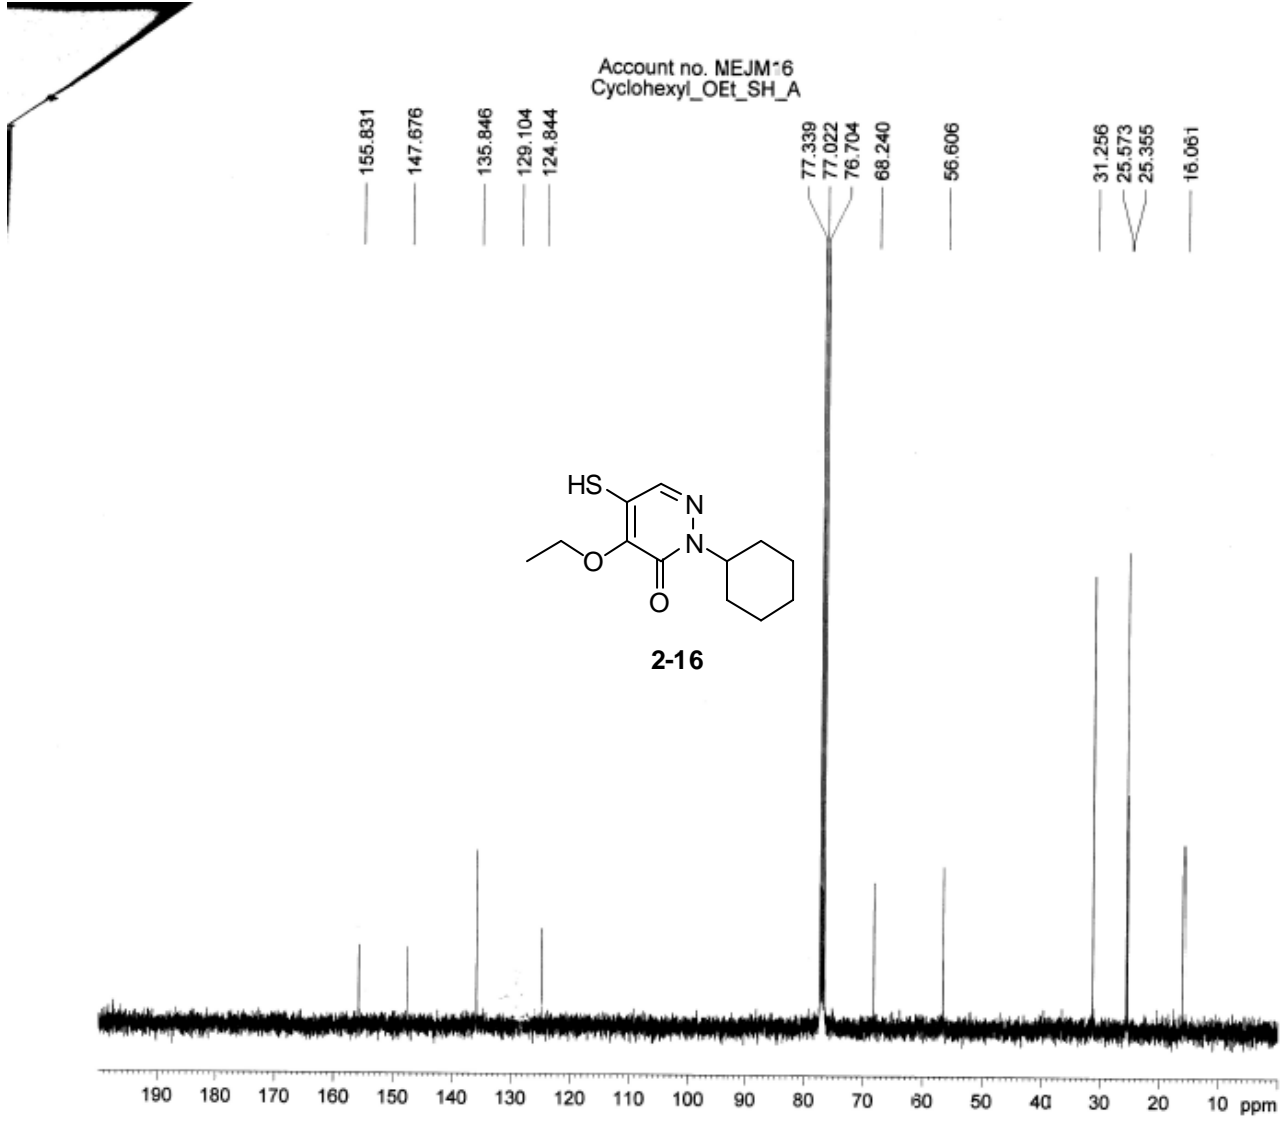

Current Data Parameters  
NAME 102308  
EXPNO 391  
PROCNO 1

F2 - Acquisition Parameters  
Date\_ 20081023  
Time 22.29  
INSTRUM arx400  
PROBHD 5 mm QNP 1H  
PULPROG zgdc30  
TD 65536  
SOLVENT CDCl3  
NS 512  
DS 0  
SWH 27777.777 Hz  
FIDRES 0.423855 Hz  
AQ 1.1796980 sec  
RG 32768  
DW 18.000 usec  
DE 25.71 usec  
TE 300.0 K  
D12 0.0000200 sec  
CL5 23.50 dB  
CPDPRG waltz16  
P31 100.00 usec  
C1 2.0000000 sec  
P1 8.25 usec  
SFO1 100.6248445 MHz  
NUCLEUS 13C  
D11 0.0300000 sec

F2 - Processing parameters  
SI 65536  
SF 100.6127710 MHz  
WDW EM  
SSB 0  
LB 1.00 Hz  
GB 0  
PC 1.40

Account no. MEJM16  
Cyclohexyl\_OEt\_SH\_A

7.607  
7.261  
4.863  
4.854  
4.843  
4.834  
4.825  
4.814  
4.805  
4.604  
4.586  
4.568  
4.551  
3.925  
1.875  
1.868  
1.841  
1.816  
1.740  
1.728  
1.706  
1.698  
1.677  
1.668  
1.645  
1.637  
1.490  
1.481  
1.457  
1.449  
1.440  
1.425  
1.416  
1.405

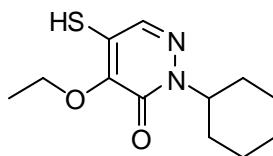

2-16

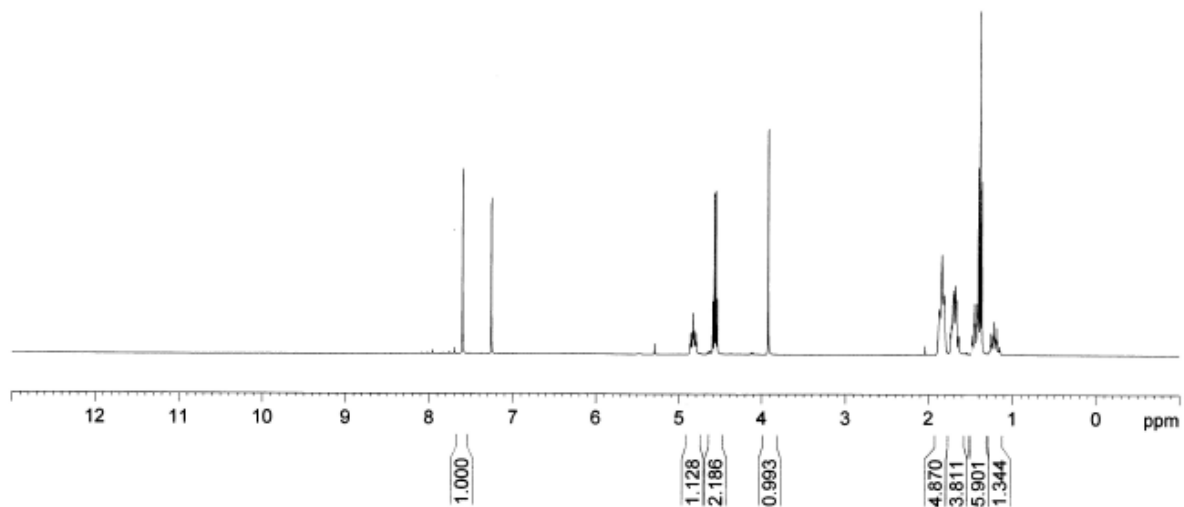

Current Data Parameters  
NAME 102308  
EXPNO 390  
PROCNO 1

F2 - Acquisition Parameters  
Date\_ 20081C23  
Time 22.00  
INSTRUM arx400  
PROBHD 5 mm QNP 1H  
PU\_PROG zg30  
TD 65536  
SOLVENT CDCl3  
NS 32  
DS 0  
SWH 8064.516 Hz  
FIDRES 0.123055 Hz  
AQ 4.0632820 sec  
RG 1024  
DW 62.000 usec  
DE 88.57 usec  
TE 300.0 K  
D1 2.00000000 sec  
P1 7.50 usec  
SFO1 400.1324008 MHz  
NUCLEUS 1H

F2 - Processing parameters  
SI 65536  
SF 400.1300173 MHz  
WCW EM  
SSB 0  
LB 0.30 Hz  
GB 0  
PC 1.00

Account no. MEJM16  
Ph\_OEt\_SH\_pure

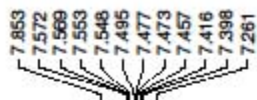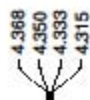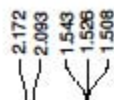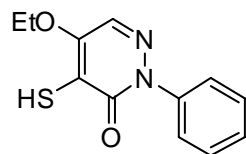

2-18

Current Data Parameters  
NAME 092708  
EXPNO 70  
PROCNO 1

F2 - Acquisition Parameters  
Date\_ 20080927  
Time 16.14  
INSTRUM ax400  
PROBHD 5 mm QNP 1H  
PULPROG zg30  
TD 65536  
SOLVENT CDCl3  
NS 8  
DS 0  
SWH 8064.516 Hz  
FIDRES 0.123055 Hz  
AQ 4.0632820 sec  
RG 2860  
DW 62.000 usec  
DE 88.57 usec  
TE 300.0 K  
D1 2.0000000 sec  
P1 7.50 usec  
SFO1 400.1324008 MHz  
NUCLEUS 1H

F2 - Processing parameters  
SI 65536  
SF 400.1300173 MHz  
WDW EM  
SSB 0  
LB 0.30 Hz  
GB 0  
PC 1.00

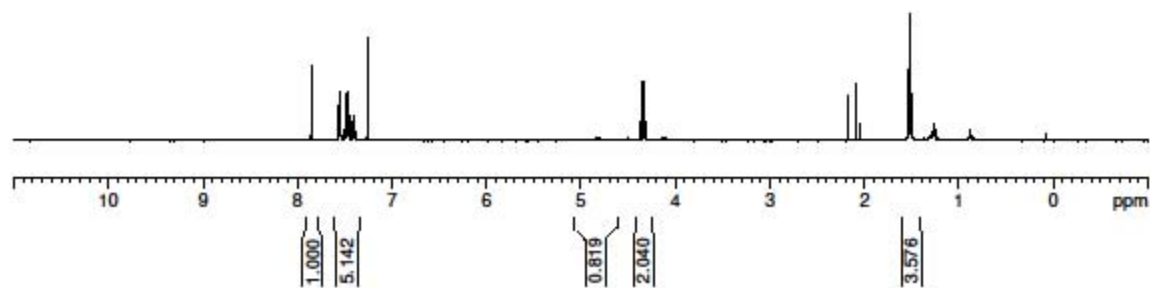

default proton parameters

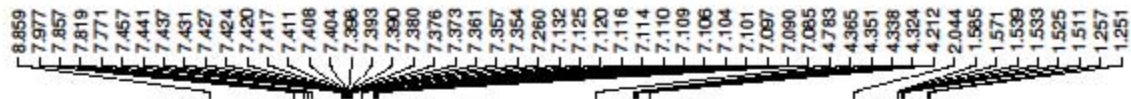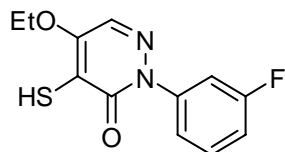

2-19

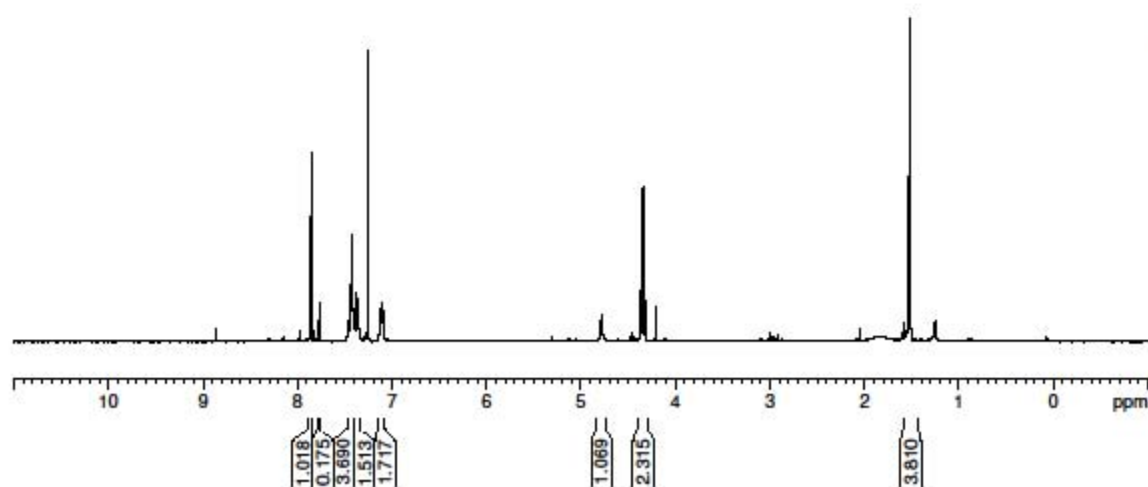

Current Data Parameters  
NAME 3Php\_OEt\_SH\_B\_re  
EXPNO 1  
PROCNO 1

F2 - Acquisition Parameters  
Date\_ 20081104  
Time 8.06  
INSTRUM avance500  
PROBHD 5 mm bb-Z 2800  
PULPROG zg30  
TD 32768  
SOLVENT CDCl3  
NS 8  
DS 0  
SWH 10000.000 Hz  
FIDRES 0.305176 Hz  
AQ 1.6385000 sec  
RG 1024  
DW 50.000 usec  
DE 6.00 usec  
TE 295.2 K  
D1 2.00000000 sec  
MCREST 0.00000000 sec  
MCWRK 0.01500000 sec

CHANNEL f1  
NUC1 1H  
P1 12.00 usec  
PL1 0.00 dB  
SFO1 500.3330020 MHz

F2 - Processing parameters  
SI 32768  
SF 500.3300220 MHz  
WDW EM  
SSB 0  
LB 0.30 Hz  
GB 0  
PC 1.00

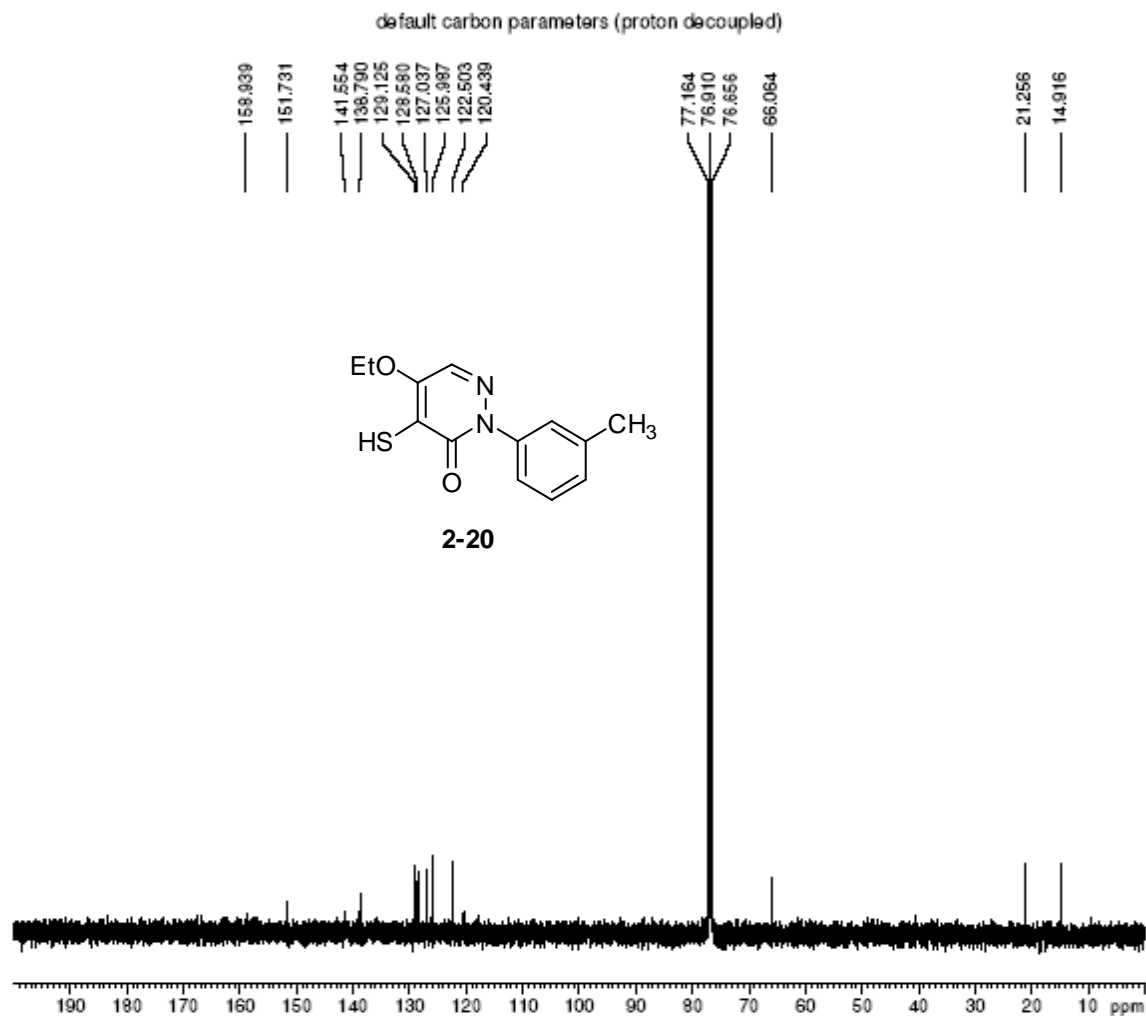

Current Data Parameters  
 NAME 3Tolyl\_OEt\_SH\_B\_re  
 EXPNO 2  
 PROCNO 1

F2 - Acquisition Parameters  
 Date\_ 20081104  
 Time 8.15  
 INSTRUM avance500  
 PROBHD 5 mm bb-Z Z800  
 PULPROG zgpg30  
 TD 65536  
 SOLVENT CDCl3  
 NS 128  
 DS 0  
 SWH 32679.738 Hz  
 FIDRES 0.498653 Hz  
 AQ 1.0027661 sec  
 RG 4096  
 DW 15.300 usec  
 DE 6.00 usec  
 TE 295.5 K  
 D1 2.00000000 sec  
 d11 0.03000000 sec  
 MCREST 0.00000000 sec  
 MCWRK 0.01500000 sec

----- CHANNEL f1 -----  
 NUC1 13C  
 P1 5.25 usec  
 PL1 0.00 dB  
 SFO1 125.8231939 MHz

----- CHANNEL f2 -----  
 CPDPRG2 waltz16  
 NUC2 1H  
 P-CPD2 105.00 usec  
 PL2 120.00 dB  
 PL12 19.00 dB  
 SFO2 500.3320013 MHz

F2 - Processing parameters  
 SI 65536  
 SF 125.8080969 MHz  
 WDW EM  
 SSB 0  
 LB 1.00 Hz  
 GB 0  
 PC 1.40



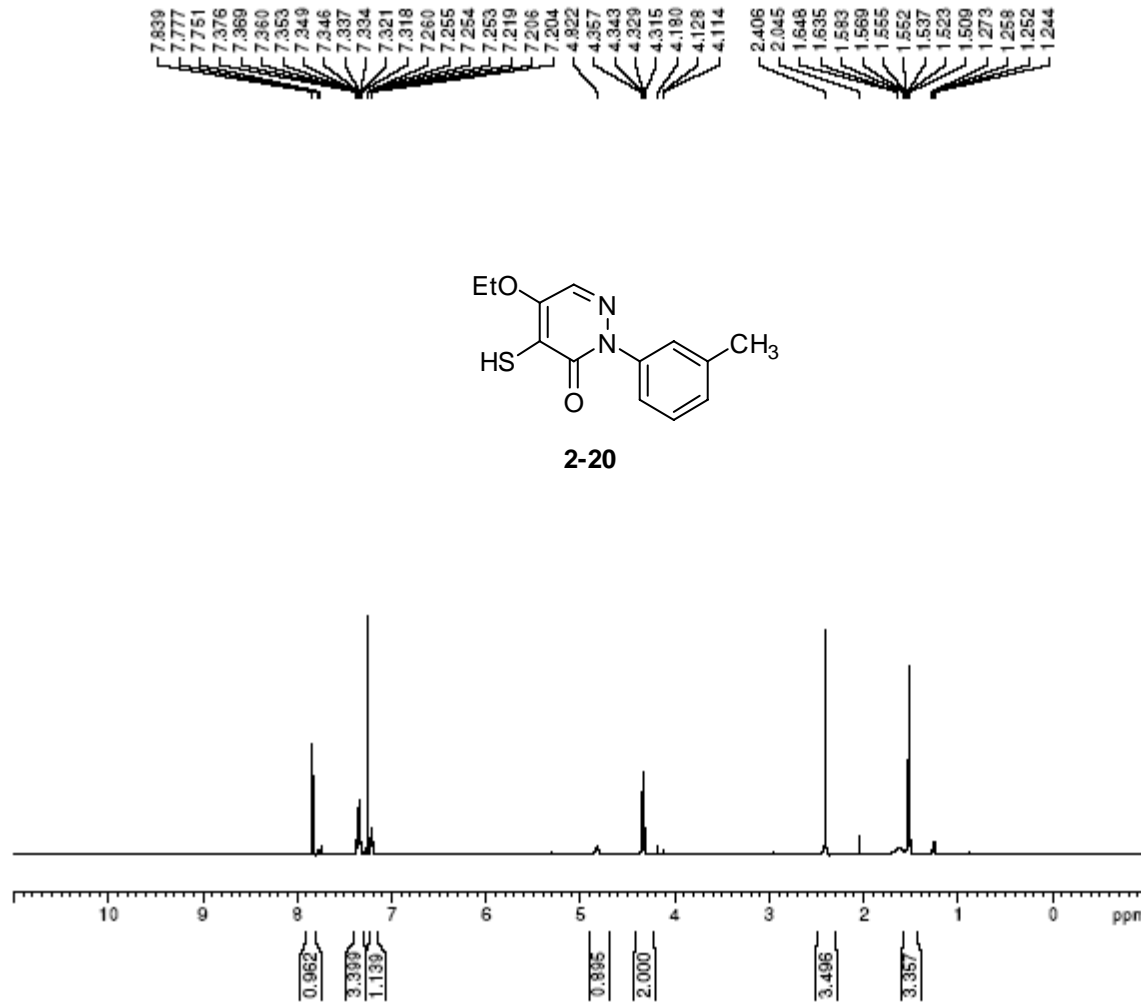

Current Data Parameters  
 NAME 3Tolyl\_OEt\_SH\_B\_re  
 EXPNO 1  
 PROCNO 1

F2 - Acquisition Parameters  
 Date\_ 20081104  
 Time 8.11  
 INSTRUM avance500  
 PROBHD 5 mm bb-Z Z800  
 PULPROG zg30  
 TD 32768  
 SOLVENT CDCl3  
 NS 8  
 DS 0  
 SWH 10000.000 Hz  
 FIDRES 0.305176 Hz  
 AQ 1.6385000 sec  
 RG 1024  
 DW 50.000 usec  
 DE 6.00 usec  
 TE 295.2 K  
 D1 2.00000000 sec  
 MCREST 0.00000000 sec  
 MCWRK 0.01500000 sec

----- CHANNEL f1 -----  
 NUC1 1H  
 P1 12.00 usec  
 PL1 0.00 dB  
 SFO1 500.3330020 MHz

F2 - Processing parameters  
 SI 32768  
 SF 500.33300220 MHz  
 WDW EM  
 SSB 0  
 LB 0.30 Hz  
 GB 0  
 PC 1.00

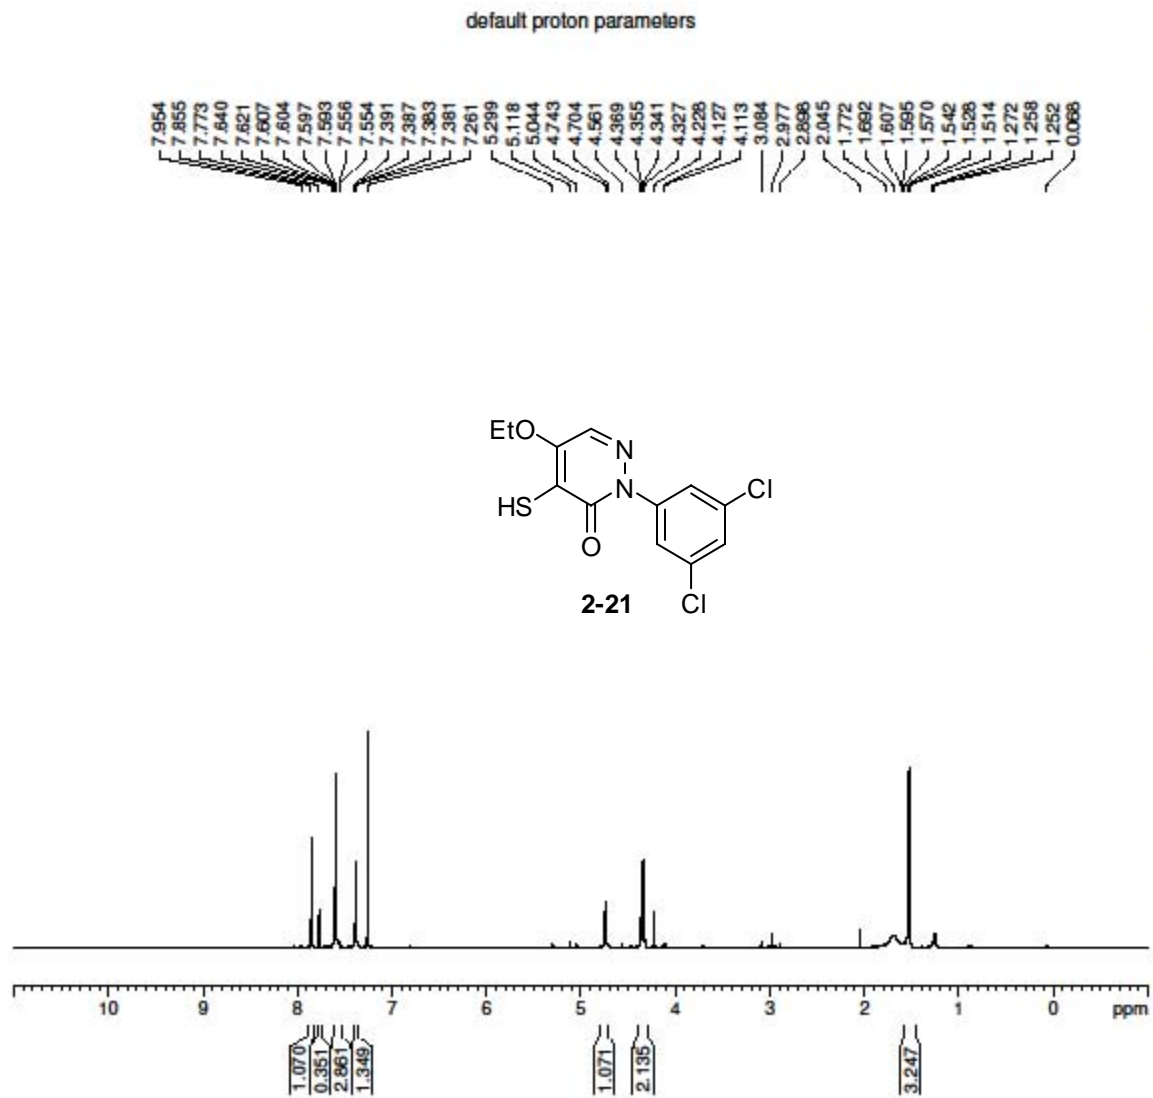

Current Data Parameters  
 NAME 3,5-dichloroPh\_OEt\_1  
 EXPNO 1  
 PROCNO 1

F2 - Acquisition Parameters  
 Date\_ 20081104  
 Time 8.30  
 INSTRUM avance500  
 PROBHD 5 mm bb-Z 2800  
 PULPROG zg30  
 TD 32768  
 SOLVENT CDCl3  
 NS 8  
 DS 0  
 SWH 10000.000 Hz  
 FIDRES 0.305176 Hz  
 AQ 1.6385000 sec  
 RG 1024  
 DW 50.000 usec  
 DE 6.00 usec  
 TE 295.3 K  
 D1 2.00000000 sec  
 MCREST 0.00000000 sec  
 MCWRK 0.01500000 sec

----- CHANNEL f1 -----  
 NUC1 1H  
 P1 12.00 usec  
 PL1 0.00 dB  
 SFO1 500.3330020 MHz

F2 - Processing parameters  
 SI 32768  
 SF 500.3300220 MHz  
 WDW EM  
 SSB 0  
 LB 0.30 Hz  
 GB 0  
 PC 1.00

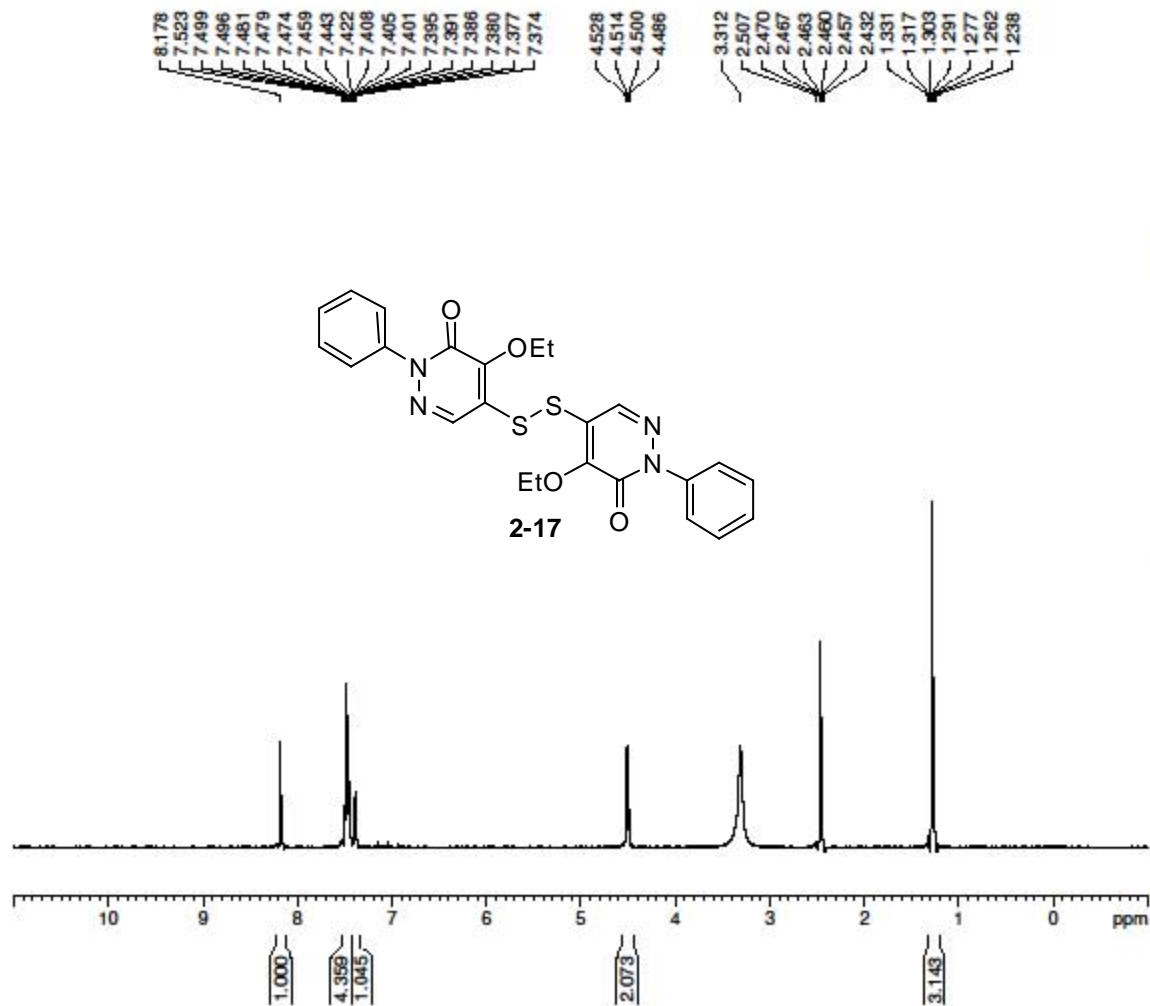

Current Data Parameters  
 NAME W1-YJ2-17-re  
 EXPNO 1  
 PROCNO 1

F2 - Acquisition Parameters  
 Date\_ 20090729  
 Time 9.18  
 INSTRUM avance500  
 PROBHD 5 mm bb-Z 2800  
 PULPROG zg30  
 TD 65536  
 SOLVENT DMSO  
 NS 2  
 DS 0  
 SWH 10000.000 Hz  
 FIDRES 0.152588 Hz  
 AQ 3.2769001 sec  
 RG 1024  
 DW 50.000 usec  
 DE 6.00 usec  
 TE 296.2 K  
 D1 2.00000000 sec  
 MCREST 0.00000000 sec  
 MCWRK 0.01500000 sec

CHANNEL f1  
 NUC1 1H  
 P1 12.00 usec  
 PL1 0.00 dB  
 SFO1 500.3330020 MHz

F2 - Processing parameters  
 SI 32768  
 SF 500.3300220 MHz  
 WDW EM  
 SSB 0  
 LB 0.30 Hz  
 GB 0  
 PC 1.00

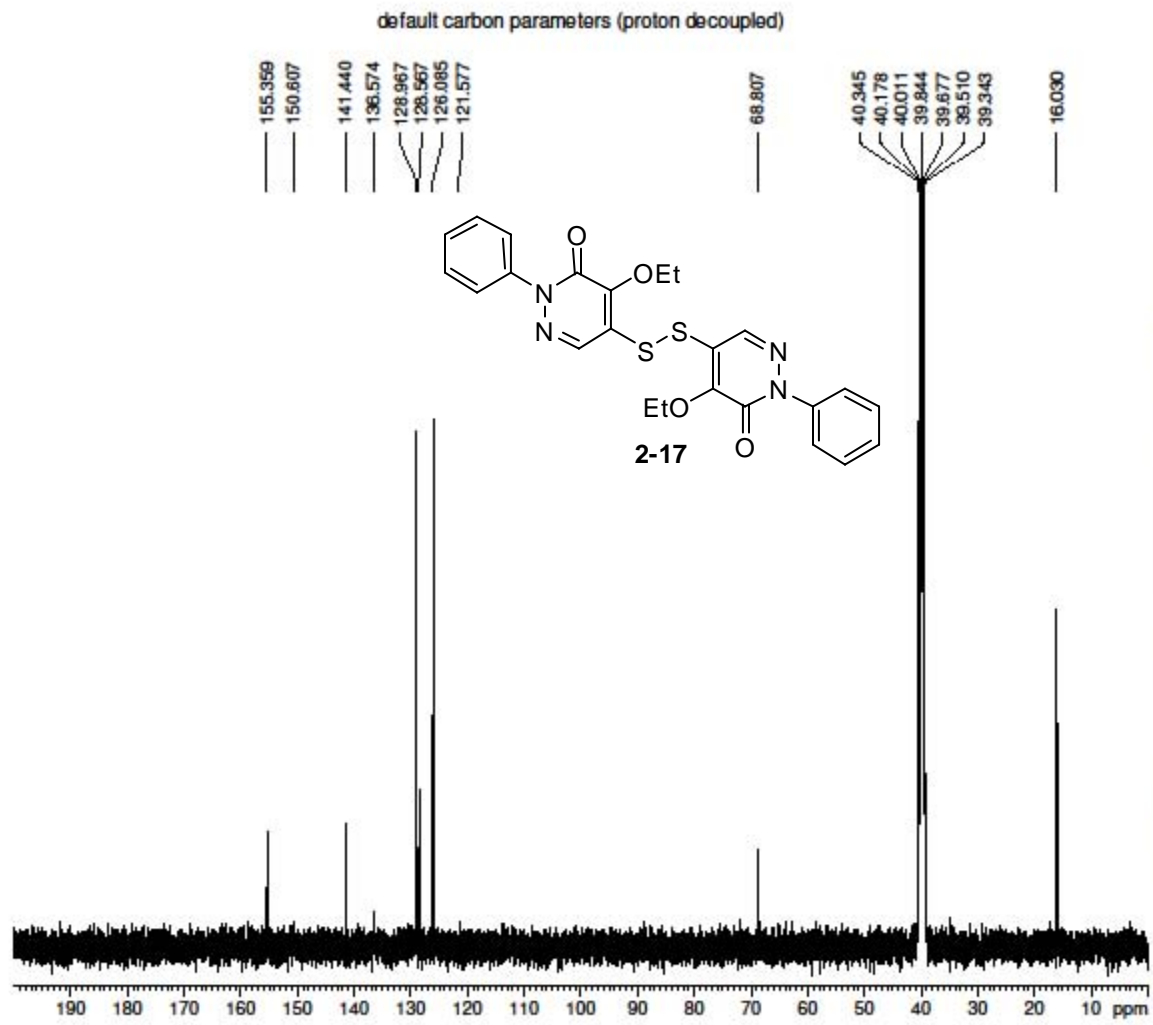

Current Data Parameters  
 NAME W1-YJ2-17-re  
 EXPNO 2  
 PROCNO 1

F2 - Acquisition Parameters  
 Date\_ 20090729  
 Time 9.23  
 INSTRUM avance500  
 PROBHD 5 mm bb-Z 2800  
 PULPROG zgpg30  
 TD 65536  
 SOLVENT DMSO  
 NS 640  
 DS 0  
 SWH 32679.738 Hz  
 FIDRES 0.498653 Hz  
 AQ 1.0027661 sec  
 RG 4096  
 DW 15.300 usec  
 DE 6.00 usec  
 TE 296.6 K  
 D1 2.00000000 sec  
 d11 0.03000000 sec  
 MCREST 0.00000000 sec  
 MCWRK 0.01500000 sec

----- CHANNEL f1 -----  
 NUC1 13C  
 P1 5.25 usec  
 PL1 0.00 dB  
 SFO1 125.8231939 MHz

----- CHANNEL f2 -----  
 CPDPRG2 waitz16  
 NUC2 1H  
 PCPD2 100.00 usec  
 PL2 120.00 dB  
 PL12 16.10 dB  
 SFO2 500.3320013 MHz

F2 - Processing parameters  
 SI 65536  
 SF 125.8080969 MHz  
 WDW EM  
 SSB 0  
 LB 1.00 Hz  
 GB 0  
 PC 1.40

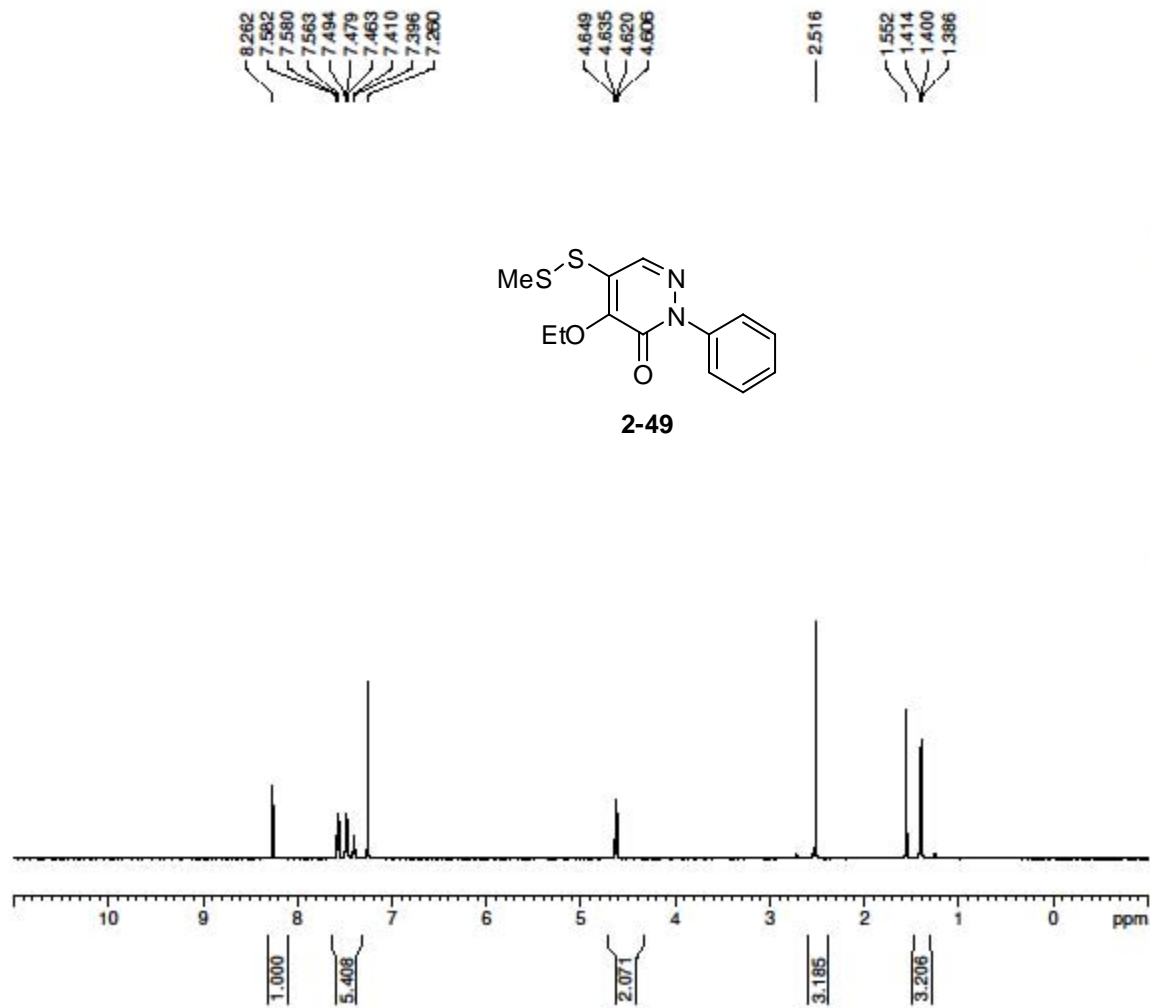

Current Data Parameters  
 NAME PhePh\_OEt\_SSMe\_A  
 EXPNO 1  
 PROCNO 1

F2 - Acquisition Parameters  
 Date\_ 20081209  
 Time 10.45  
 INSTRUM avance500  
 PROBHD 5 mm bb-Z 2800  
 PULPROG zg30  
 TD 32768  
 SOLVENT CDCl3  
 NS 8  
 DS 0  
 SWH 10000.000 Hz  
 FIDRES 0.305176 Hz  
 AQ 1.6385000 sec  
 RG 1024  
 DW 50.000 usec  
 DE 6.00 usec  
 TE 294.7 K  
 D1 2.00000000 sec  
 MCREST 0.00000000 sec  
 MCWRK 0.01500000 sec

----- CHANNEL f1 -----  
 NUC1 1H  
 P1 12.00 usec  
 PL1 0.00 dB  
 SFO1 500.3330020 MHz

F2 - Processing parameters  
 SI 32768  
 SF 500.3300220 MHz  
 WDW EM  
 SSB 0  
 LB 0.30 Hz  
 GB 0  
 PC 1.00

default carbon parameters (proton decoupled)

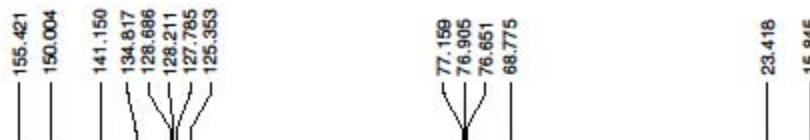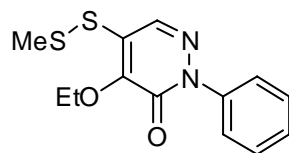

2-49

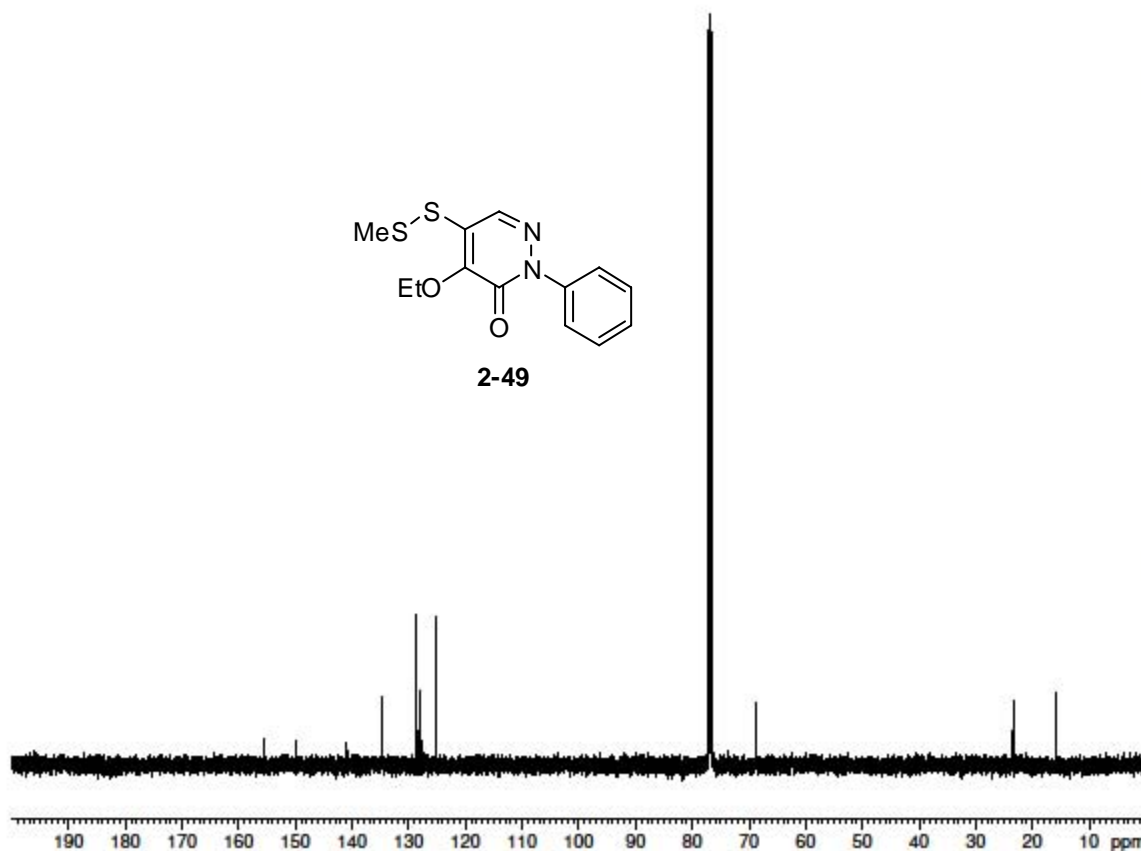

Current Data Parameters  
NAME W1-YJ2-49  
EXPNO 2  
PROCNO 1

F2 - Acquisition Parameters  
Date\_ 20090729  
Time 12.37  
INSTRUM avance500  
PROBHD 5 mm bb-Z 2800  
PULPROG zgpg30  
TD 65536  
SOLVENT CDCl3  
NS 128  
DS 0  
SWH 32679.738 Hz  
FIDRES 0.498653 Hz  
AQ 1.0027661 sec  
RG 8192  
DW 15.300 usec  
DE 6.00 usec  
TE 296.5 K  
D1 2.00000000 sec  
d11 0.03000000 sec  
MCREST 0.00000000 sec  
MCWRK 0.01500000 sec

----- CHANNEL f1 -----  
NUC1 13C  
P1 5.25 usec  
PL1 0.00 dB  
SFO1 125.8231939 MHz

----- CHANNEL f2 -----  
CPDPRG2 waltz16  
NUC2 1H  
PCPD2 100.00 usec  
PL2 120.00 dB  
PL12 16.10 dB  
SFO2 500.3320013 MHz

F2 - Processing parameters  
SI 65536  
SF 125.8080969 MHz  
WDW EM  
SSB 0  
LB 1.00 Hz  
GB 0  
PC 1.40

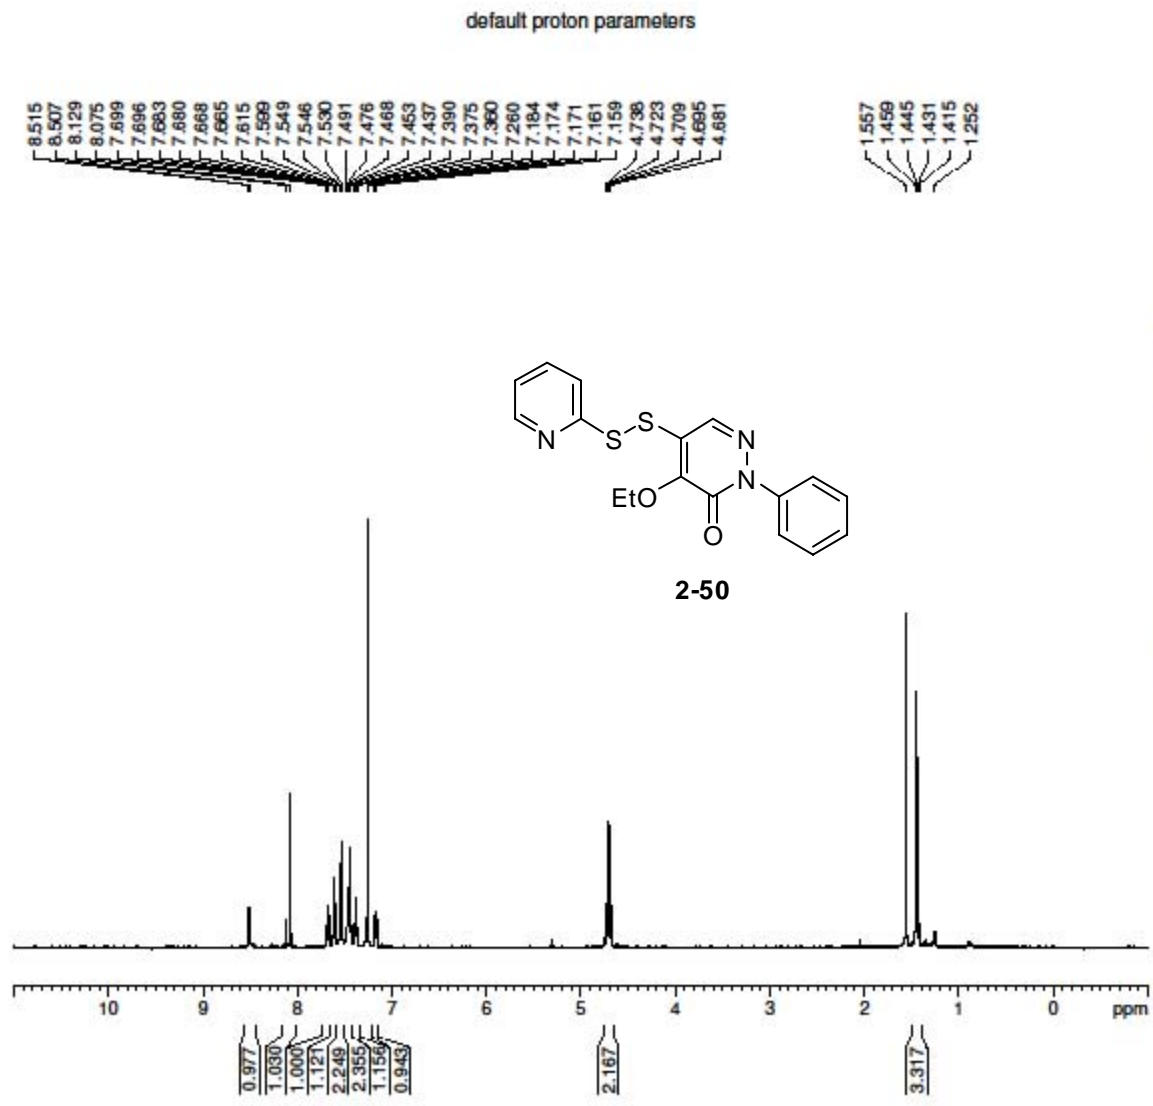

Current Data Parameters  
 NAME Ph\_OEt\_SSPyr\_A\_bo  
 EXPNO 1  
 PROCNO 1

F2 - Acquisition Parameters  
 Date\_ 20081209  
 Time 13.02  
 INSTRUM avance500  
 PROBHD 5 mm bb-Z 2800  
 PULPROG zg30  
 TD 32768  
 SOLVENT CDCl3  
 NS 8  
 DS 0  
 SWH 10000.000 Hz  
 FIDRES 0.305176 Hz  
 AQ 1.6385000 sec  
 RG 1024  
 DW 50.000 usec  
 DE 6.00 usec  
 TE 294.7 K  
 D1 2.00000000 sec  
 MCREST 0.00000000 sec  
 MCWRK 0.01500000 sec

----- CHANNEL f1 -----  
 NUC1 1H  
 P1 12.00 usec  
 PL1 0.00 dB  
 SFO1 500.3330020 MHz

F2 - Processing parameters  
 SI 32768  
 SF 500.3300220 MHz  
 WDW EM  
 SSB 0  
 LB 0.30 Hz  
 GB 0  
 PC 1.00

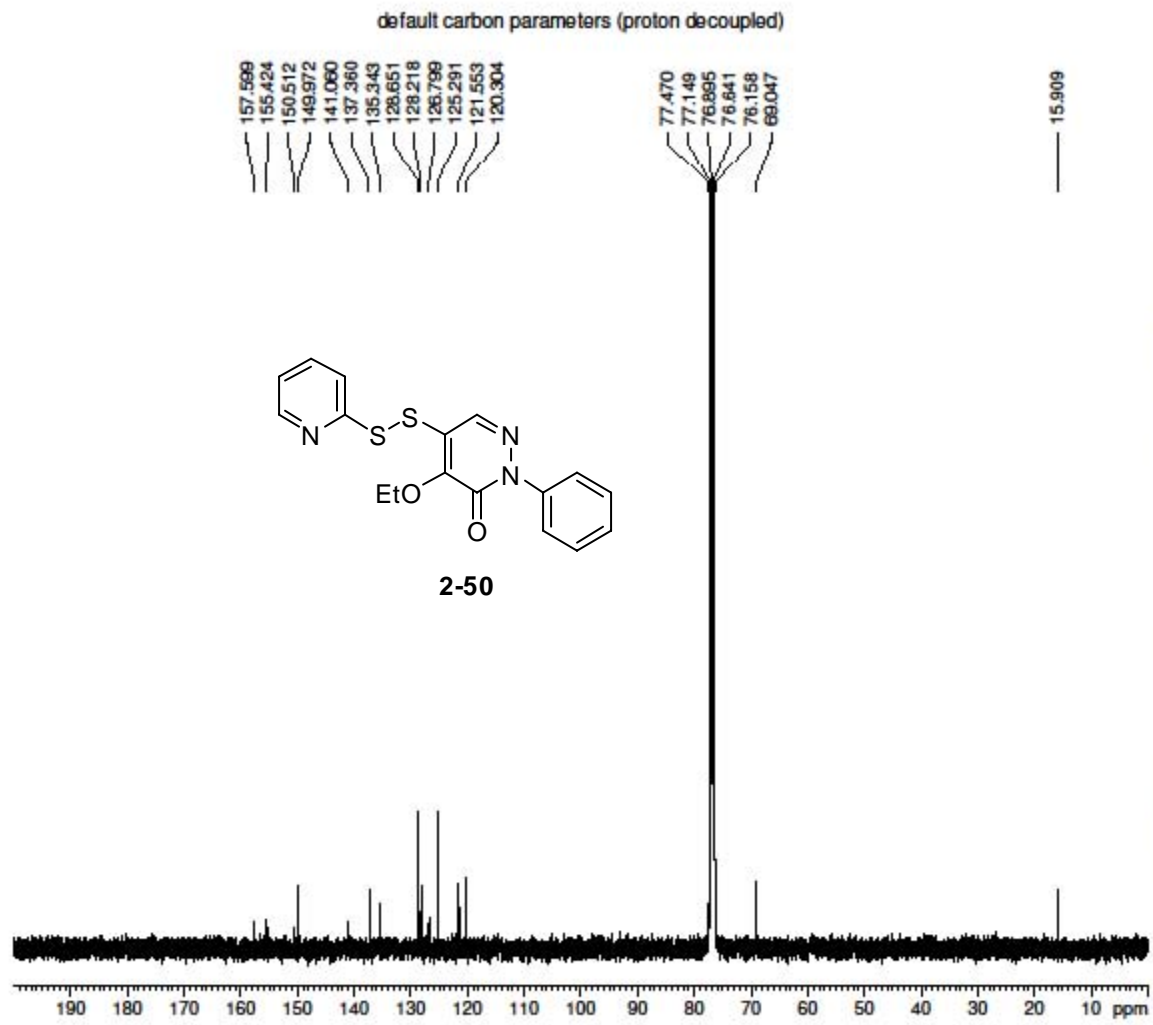

Current Data Parameters  
 NAME Woogie  
 EXPNO 1  
 PROCNO 1

F2 - Acquisition Parameters  
 Date\_ 20090729  
 Time 19.20  
 INSTRUM avance500  
 PROBHD 5 mm bb-Z 2800  
 PULPROG zgpg30  
 TD 65536  
 SOLVENT CDCl3  
 NS 10000  
 DS 0  
 SWH 32679.738 Hz  
 FIDRES 0.498653 Hz  
 AQ 1.0027661 sec  
 RG 4096  
 DW 15.300 usec  
 DE 6.00 usec  
 TE 296.2 K  
 D1 2.00000000 sec  
 d11 0.03000000 sec  
 MCREST 0.00000000 sec  
 MCWRK 0.01500000 sec

----- CHANNEL f1 -----  
 NUC1 13C  
 P1 5.25 usec  
 PL1 0.00 dB  
 SFO1 125.8231939 MHz

----- CHANNEL f2 -----  
 CPDPRG2 waltz16  
 NUC2 1H  
 PCPD2 100.00 usec  
 PL2 120.00 dB  
 PL12 16.10 dB  
 SFO2 500.3320013 MHz

F2 - Processing parameters  
 SI 65536  
 SF 125.8080969 MHz  
 WDW EM  
 SSB 0  
 LB 1.00 Hz  
 GB 0  
 PC 1.40



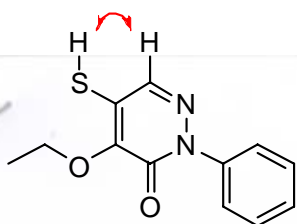

2-10

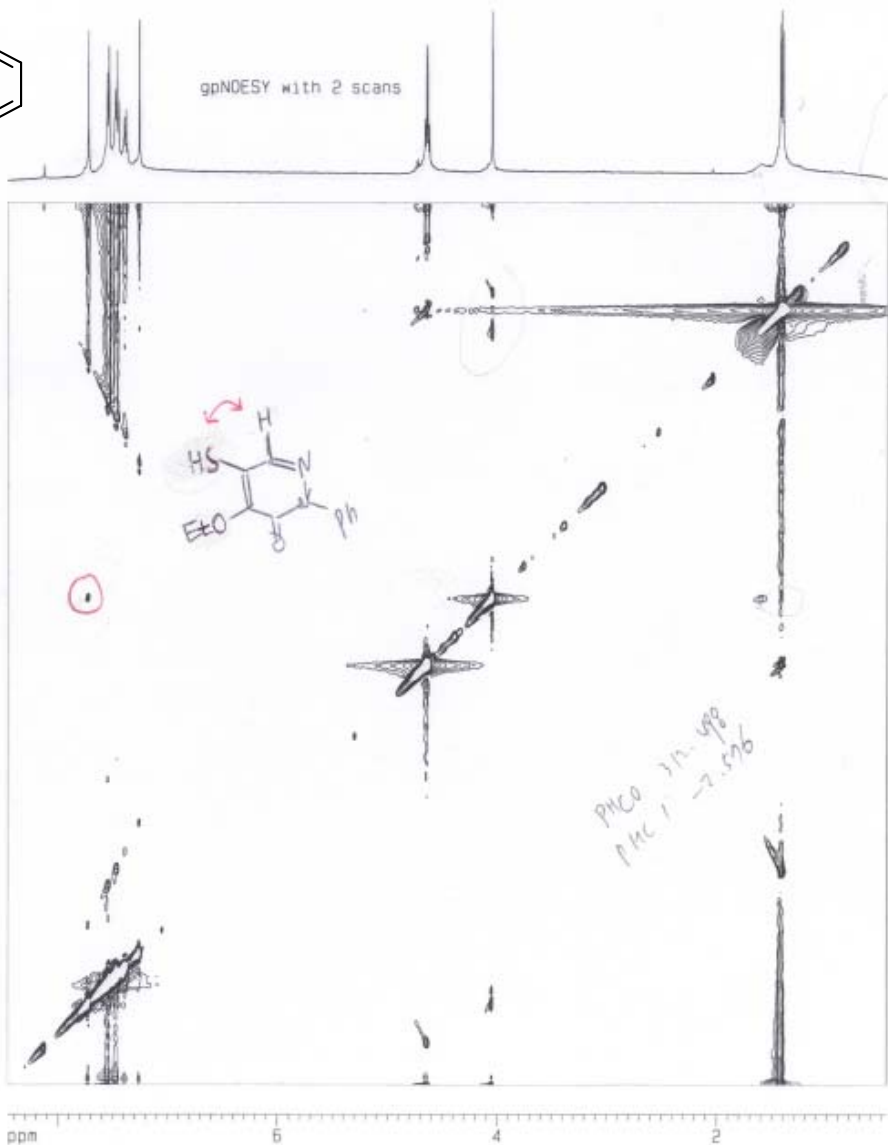

```

Current Data Parameters
NAME      NMR3_3-1_1r0101
EXPNO    1
PROCNO   1

F2 - Acquisition Parameters
Date_    20081012
Time     8:44
INSTRUM  avance300
PROBHD   5 mm cpz-1300
PULPROG  zgpg30
TD        65536
SOLVENT  CDCl3
NS        4
DS        16
SWH       4000.410 Hz
FIDRES    3.912510 Hz
AQ         0.1272100 sec
RG         181
DM         124.000 usec
DE         5.00 usec
TE         295.3 K
AQ         0.0000000 sec
D1         2.0000000 sec
D8         0.7500000 sec
d11        0.0300000 sec
D15        0.0010000 sec
G20        0.3740000 sec
IN0        0.0052460 sec
L3         128

----- CHANNEL f1 -----
NUC1      1H
P1         12.75 usec
P2         29.50 usec
PL1        0.00 dB
PL2        0.00 dB
SFO1      500.330515 MHz

----- GRADIENT CHANNEL -----
SPARE1    SINE 100
SPARE2    SINE 100
GPR1      0.10 %
GPR2      0.10 %
GPR3      0.00 %
GPR4      0.10 %
GPR5      0.10 %
GPR6      40.00 %
GPR7      -40.10 %
P15       1500.00 usec

F1 - Acquisition parameters
RG          1
TD          65536
SFO1        500.330515 MHz
FIDRES      15.850040 Hz
SW           5.001 GHz
FWDRES      undefined

F2 - Processing parameters
SI          65536
SF          500.330515 MHz
GFM         0.00 Hz
L8          0
PC          1.00

F1 - Processing parameters
SI          65536
SF          500.330515 MHz
GFM         0.00 Hz
L8          0

2D NMR plot parameters
CX2         15.00 cm
CY1         15.00 cm
F2PL2      0.450 ppm
F2L0        4232.00 Hz
F2H1        0.450 ppm
F2H0        206.27 Hz
F1P1        0.496 ppm
F1L0        4040.57 Hz
F1H1        0.473 ppm
F1H0        259.58 Hz
F2PRNCK    0.52394 ppm/Hz
F2D1CK     257.00300 Hz/cm
F1PRNCK    0.52394 ppm/Hz
F1D1CK     257.00300 Hz/cm
  
```

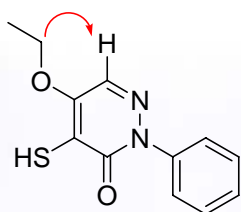

2-18

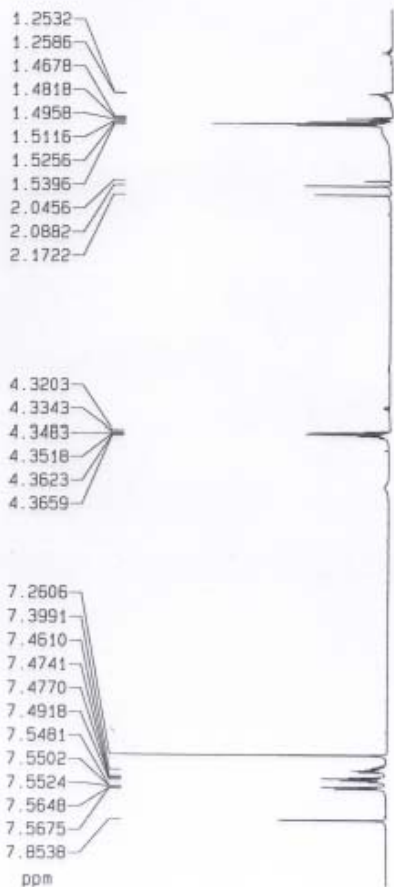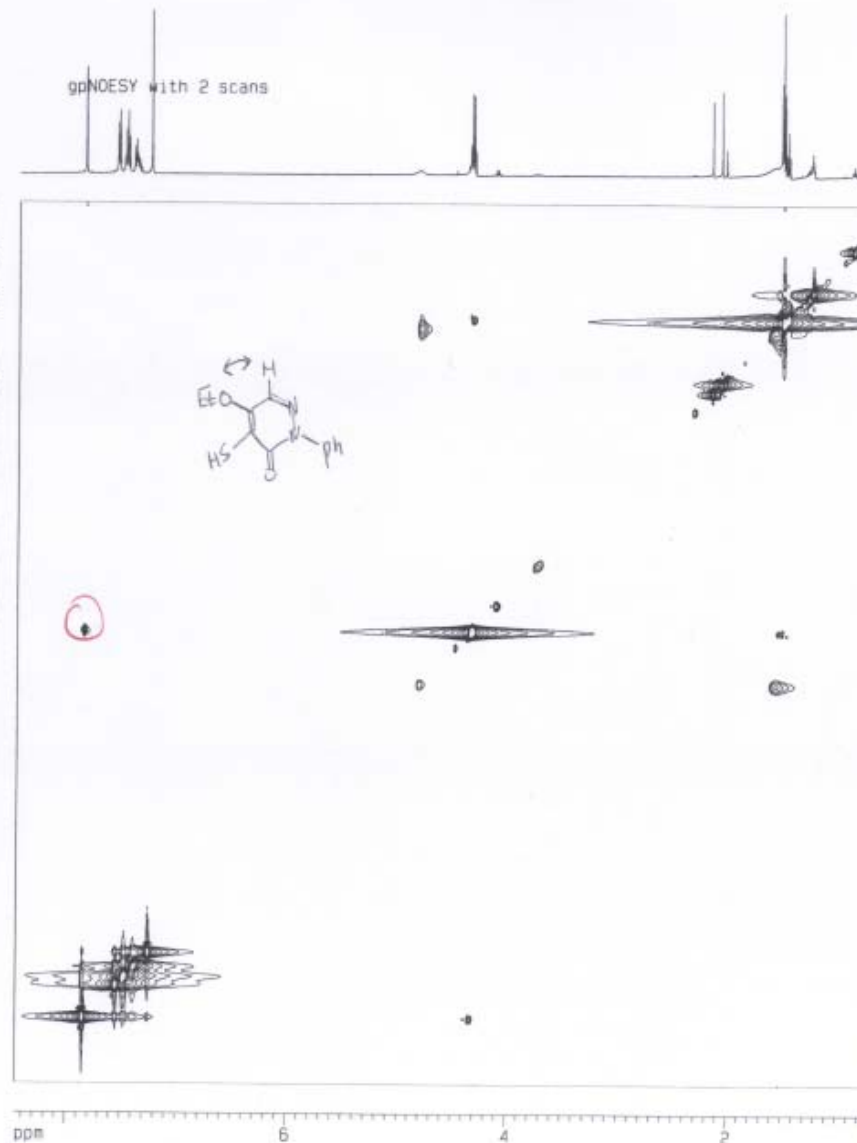

Current Data Parameters  
NAME: gqNOESY\_01\_01\_01\_01\_01\_01  
EXPNO: 1  
PROCNO: 1

F2 - Acquisition Parameters  
Date\_ : 20081010  
Time : 14.28  
INSTRUM : avance500  
PROBHD : 5 mm ssb-z BBOO  
PULPROG : zgpg30  
TD : 1674  
SOLVENT : CDCl3  
NS : 8  
DS : 16  
SWH : 4008.410 Hz  
FIDRES : 0.312512 Hz  
AQ : 0.127500 sec  
RG : 521  
IN : 174.800 usec  
TE : 0.00 usec  
IC : 295.0 K  
CO : 0.0000000 sec  
HI : 2.0000000 sec  
HO : 0.7000000 sec  
H1 : 0.0000000 sec  
H11 : 0.0001000 sec  
H2 : 0.0000000 sec  
H3 : 0.0000000 sec  
H4 : 0.0000000 sec  
H5 : 0.0000000 sec  
H6 : 0.0000000 sec  
H7 : 0.0000000 sec  
H8 : 0.0000000 sec  
H9 : 0.0000000 sec  
H10 : 0.0000000 sec  
H11 : 0.0000000 sec  
H12 : 0.0000000 sec  
H13 : 0.0000000 sec  
H14 : 0.0000000 sec  
H15 : 0.0000000 sec  
H16 : 0.0000000 sec  
H17 : 0.0000000 sec  
H18 : 0.0000000 sec  
H19 : 0.0000000 sec  
H20 : 0.0000000 sec  
H21 : 0.0000000 sec  
H22 : 0.0000000 sec  
H23 : 0.0000000 sec  
H24 : 0.0000000 sec  
H25 : 0.0000000 sec  
H26 : 0.0000000 sec  
H27 : 0.0000000 sec  
H28 : 0.0000000 sec  
H29 : 0.0000000 sec  
H30 : 0.0000000 sec  
H31 : 0.0000000 sec  
H32 : 0.0000000 sec  
H33 : 0.0000000 sec  
H34 : 0.0000000 sec  
H35 : 0.0000000 sec  
H36 : 0.0000000 sec  
H37 : 0.0000000 sec  
H38 : 0.0000000 sec  
H39 : 0.0000000 sec  
H40 : 0.0000000 sec  
H41 : 0.0000000 sec  
H42 : 0.0000000 sec  
H43 : 0.0000000 sec  
H44 : 0.0000000 sec  
H45 : 0.0000000 sec  
H46 : 0.0000000 sec  
H47 : 0.0000000 sec  
H48 : 0.0000000 sec  
H49 : 0.0000000 sec  
H50 : 0.0000000 sec  
H51 : 0.0000000 sec  
H52 : 0.0000000 sec  
H53 : 0.0000000 sec  
H54 : 0.0000000 sec  
H55 : 0.0000000 sec  
H56 : 0.0000000 sec  
H57 : 0.0000000 sec  
H58 : 0.0000000 sec  
H59 : 0.0000000 sec  
H60 : 0.0000000 sec  
H61 : 0.0000000 sec  
H62 : 0.0000000 sec  
H63 : 0.0000000 sec  
H64 : 0.0000000 sec  
H65 : 0.0000000 sec  
H66 : 0.0000000 sec  
H67 : 0.0000000 sec  
H68 : 0.0000000 sec  
H69 : 0.0000000 sec  
H70 : 0.0000000 sec  
H71 : 0.0000000 sec  
H72 : 0.0000000 sec  
H73 : 0.0000000 sec  
H74 : 0.0000000 sec  
H75 : 0.0000000 sec  
H76 : 0.0000000 sec  
H77 : 0.0000000 sec  
H78 : 0.0000000 sec  
H79 : 0.0000000 sec  
H80 : 0.0000000 sec  
H81 : 0.0000000 sec  
H82 : 0.0000000 sec  
H83 : 0.0000000 sec  
H84 : 0.0000000 sec  
H85 : 0.0000000 sec  
H86 : 0.0000000 sec  
H87 : 0.0000000 sec  
H88 : 0.0000000 sec  
H89 : 0.0000000 sec  
H90 : 0.0000000 sec  
H91 : 0.0000000 sec  
H92 : 0.0000000 sec  
H93 : 0.0000000 sec  
H94 : 0.0000000 sec  
H95 : 0.0000000 sec  
H96 : 0.0000000 sec  
H97 : 0.0000000 sec  
H98 : 0.0000000 sec  
H99 : 0.0000000 sec  
H100 : 0.0000000 sec
